# Supplementary material for: DIPPER, a spatiotemporal proteomics atlas of human intervertebral discs for exploring ageing and degeneration dynamics
Source: eLife journal article supplement (doi:10.7554/elife.64940), 2020-12-31
Supplement: supp [file elife_poa_e64940_Figure_1_figure_supplement_1.pdf › elife_poa_e64940_Figure_1_figure_supplement_1.pdf]

A

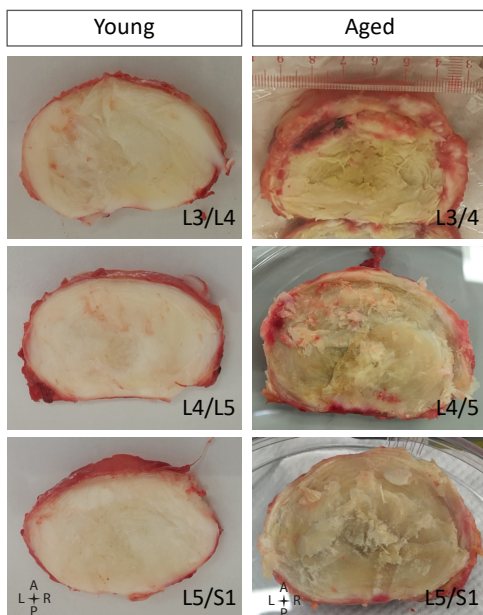

B

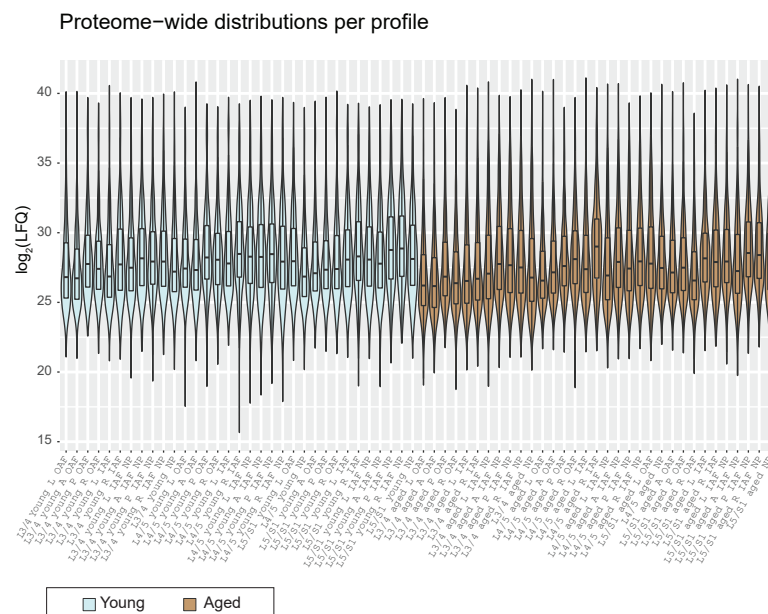

C

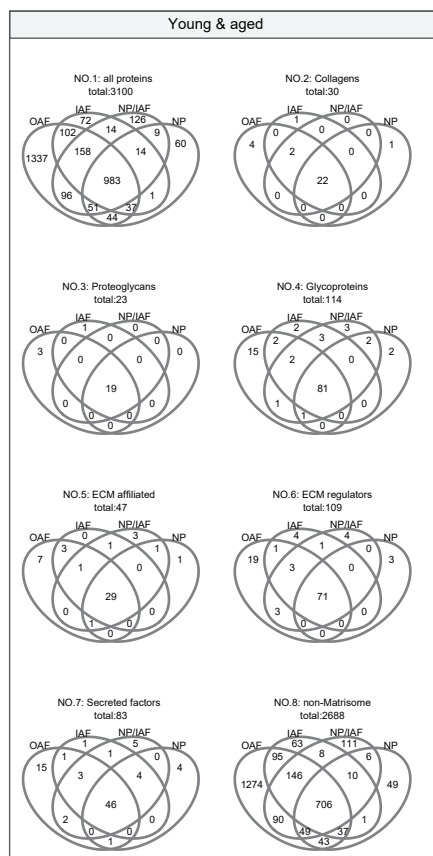

D

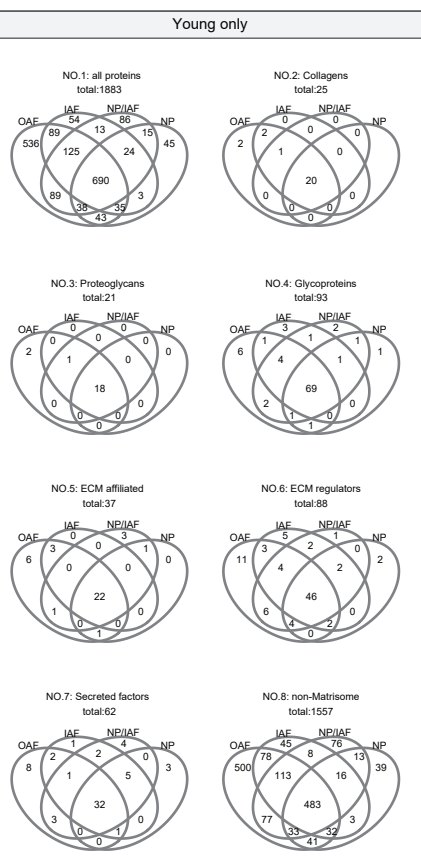

E

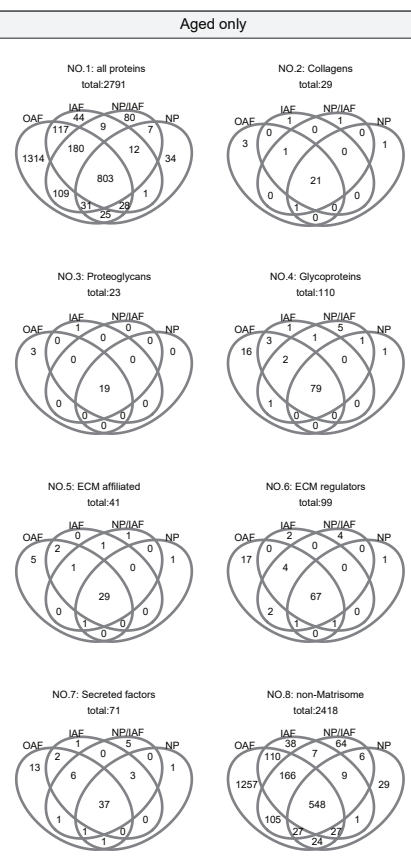

**Figure 1—figure supplement 1. Gross images of the discs and overview of proteomic data.**

(A) Gross images of the young and aged cadaveric discs. (B) Proteome-wide distributions per profile across all 66 profiles. The profiles were named with levels, ages, directions, and compartments. (C)–(E) Venn diagrams of detected proteins among the four major IVD compartments (OAF, IAF, NP/IAF, and NP), per age-group, and per protein category.
