# Supplementary material for: DIPPER, a spatiotemporal proteomics atlas of human intervertebral discs for exploring ageing and degeneration dynamics
Source: eLife journal article supplement (doi:10.7554/elife.64940), 2020-12-31
Supplement: supp [file elife_poa_e64940_Figure_1_figure_supplement_2.pdf › elife_poa_e64940_Figure_1_figure_supplement_2.pdf]

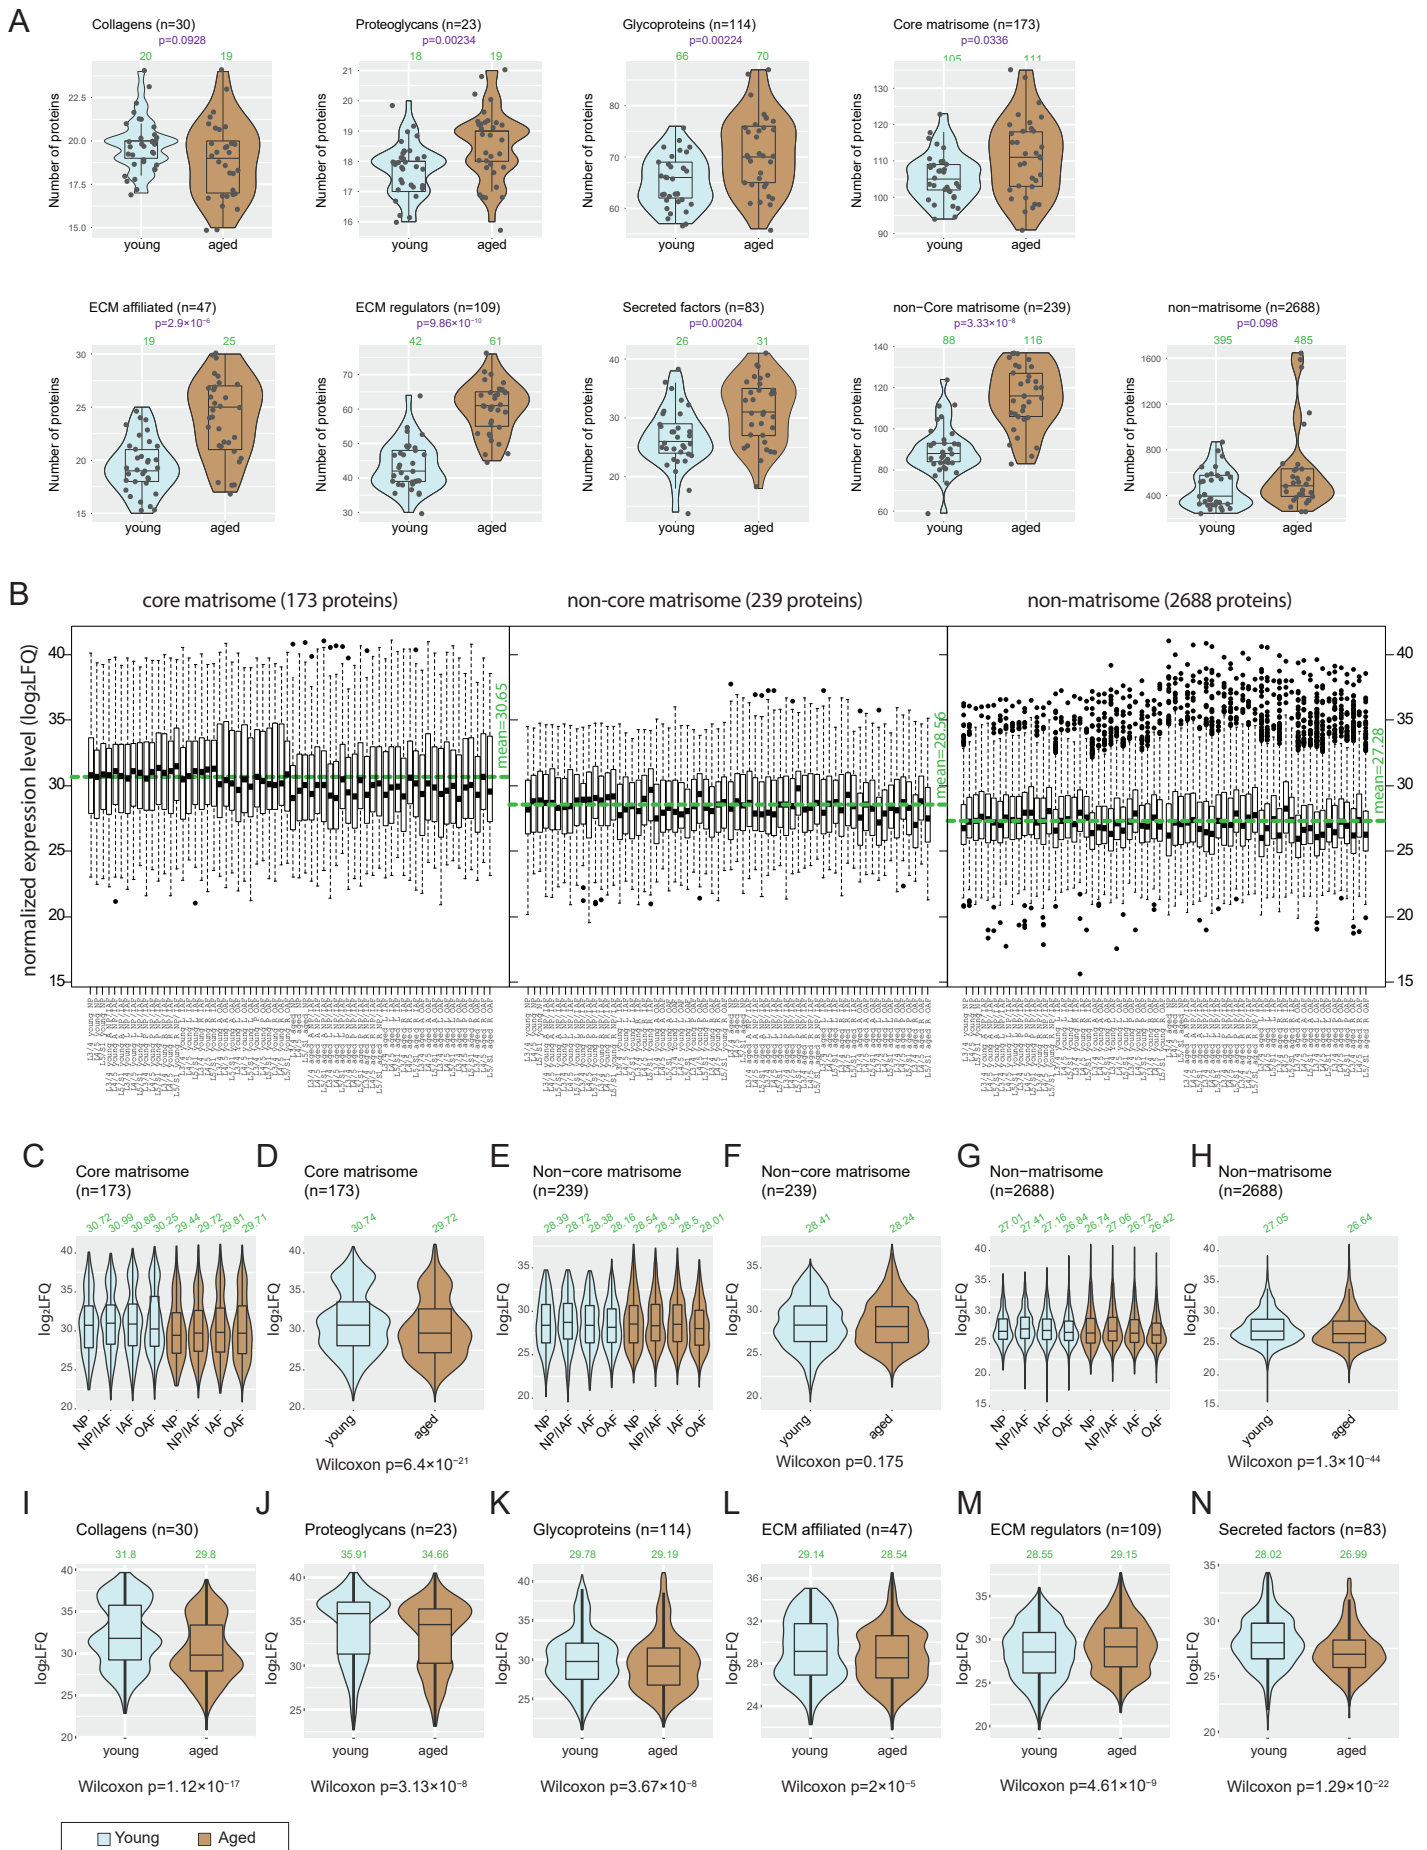

**Figure 1—figure supplement 2. Numbers of proteins detected and protein levels per each combination of sample groups.**

(A) Violin-plots showing numbers of proteins detected per age-group, for all categories of ECM and non-ECM proteins. The green numbers on top of each violin show the median number of proteins detected per respective sample group. (B) Box-plots showing the expression levels of core-matrisome, non-core matrisome, and non-matrisome proteins. Horizontal green line indicates average. (C)-(H) Violin plots showing the expression levels of major ECM categories across compartments and age-groups. (I)-(N) Violin plots showing the expression levels of sub-categories of ECM proteins across age-groups. The green numbers on top of each violin show the median number of proteins detected per respective sample group.
