# Supplementary material for: DIPPER, a spatiotemporal proteomics atlas of human intervertebral discs for exploring ageing and degeneration dynamics
Source: eLife journal article supplement (doi:10.7554/elife.64940), 2020-12-31
Supplement: supp [file elife_poa_e64940_Figure_1_figure_supplement_4.pdf › elife_poa_e64940_Figure_1_figure_supplement_4.pdf]

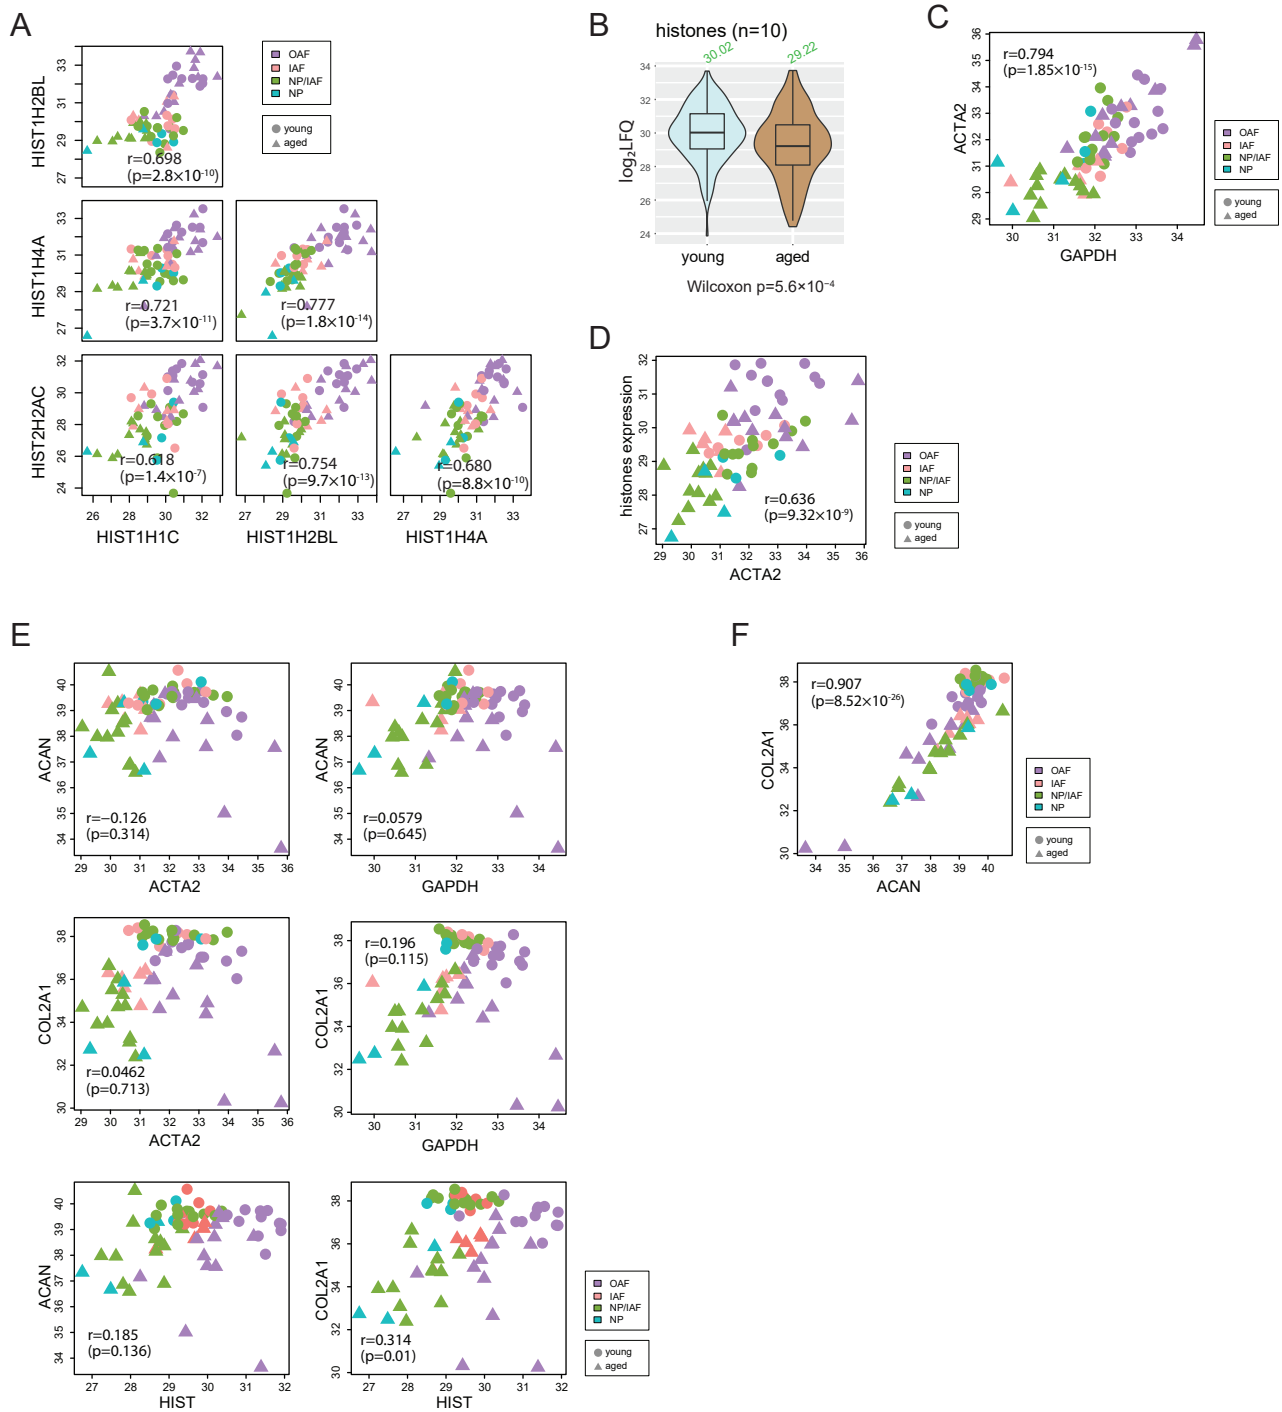

**Figure 1—figure supplement 4. Histones and housekeeping genes reflect cellularities.**

(A) Scatter-plots showing the co-expression of four histone proteins that were detected in over 60 profiles. (B) Violin plot showing the expression levels of the histones across age-groups. (C) Scatter plot showing the co-expression between ACTA2 and the average of histones. (D) Scatter plot showing the co-expression between ACTA2 and GAPDH. (E) Scatter plots showing the co-expression between ACTA2, GAPDH, and histones, and COL2A1, and ACAN. (F) Scatter plot showing the co-expression between COL2A1 and ACAN. All values are in log<sub>2</sub>(LFQ).  $r$  is Pearson correlation coefficient.
