# Supplementary material for: DIPPER, a spatiotemporal proteomics atlas of human intervertebral discs for exploring ageing and degeneration dynamics
Source: eLife journal article supplement (doi:10.7554/elife.64940), 2020-12-31
Supplement: supp [file elife_poa_e64940_Figure_3_figure_supplement_1.pdf › elife_poa_e64940_Figure_3_figure_supplement_1.pdf]

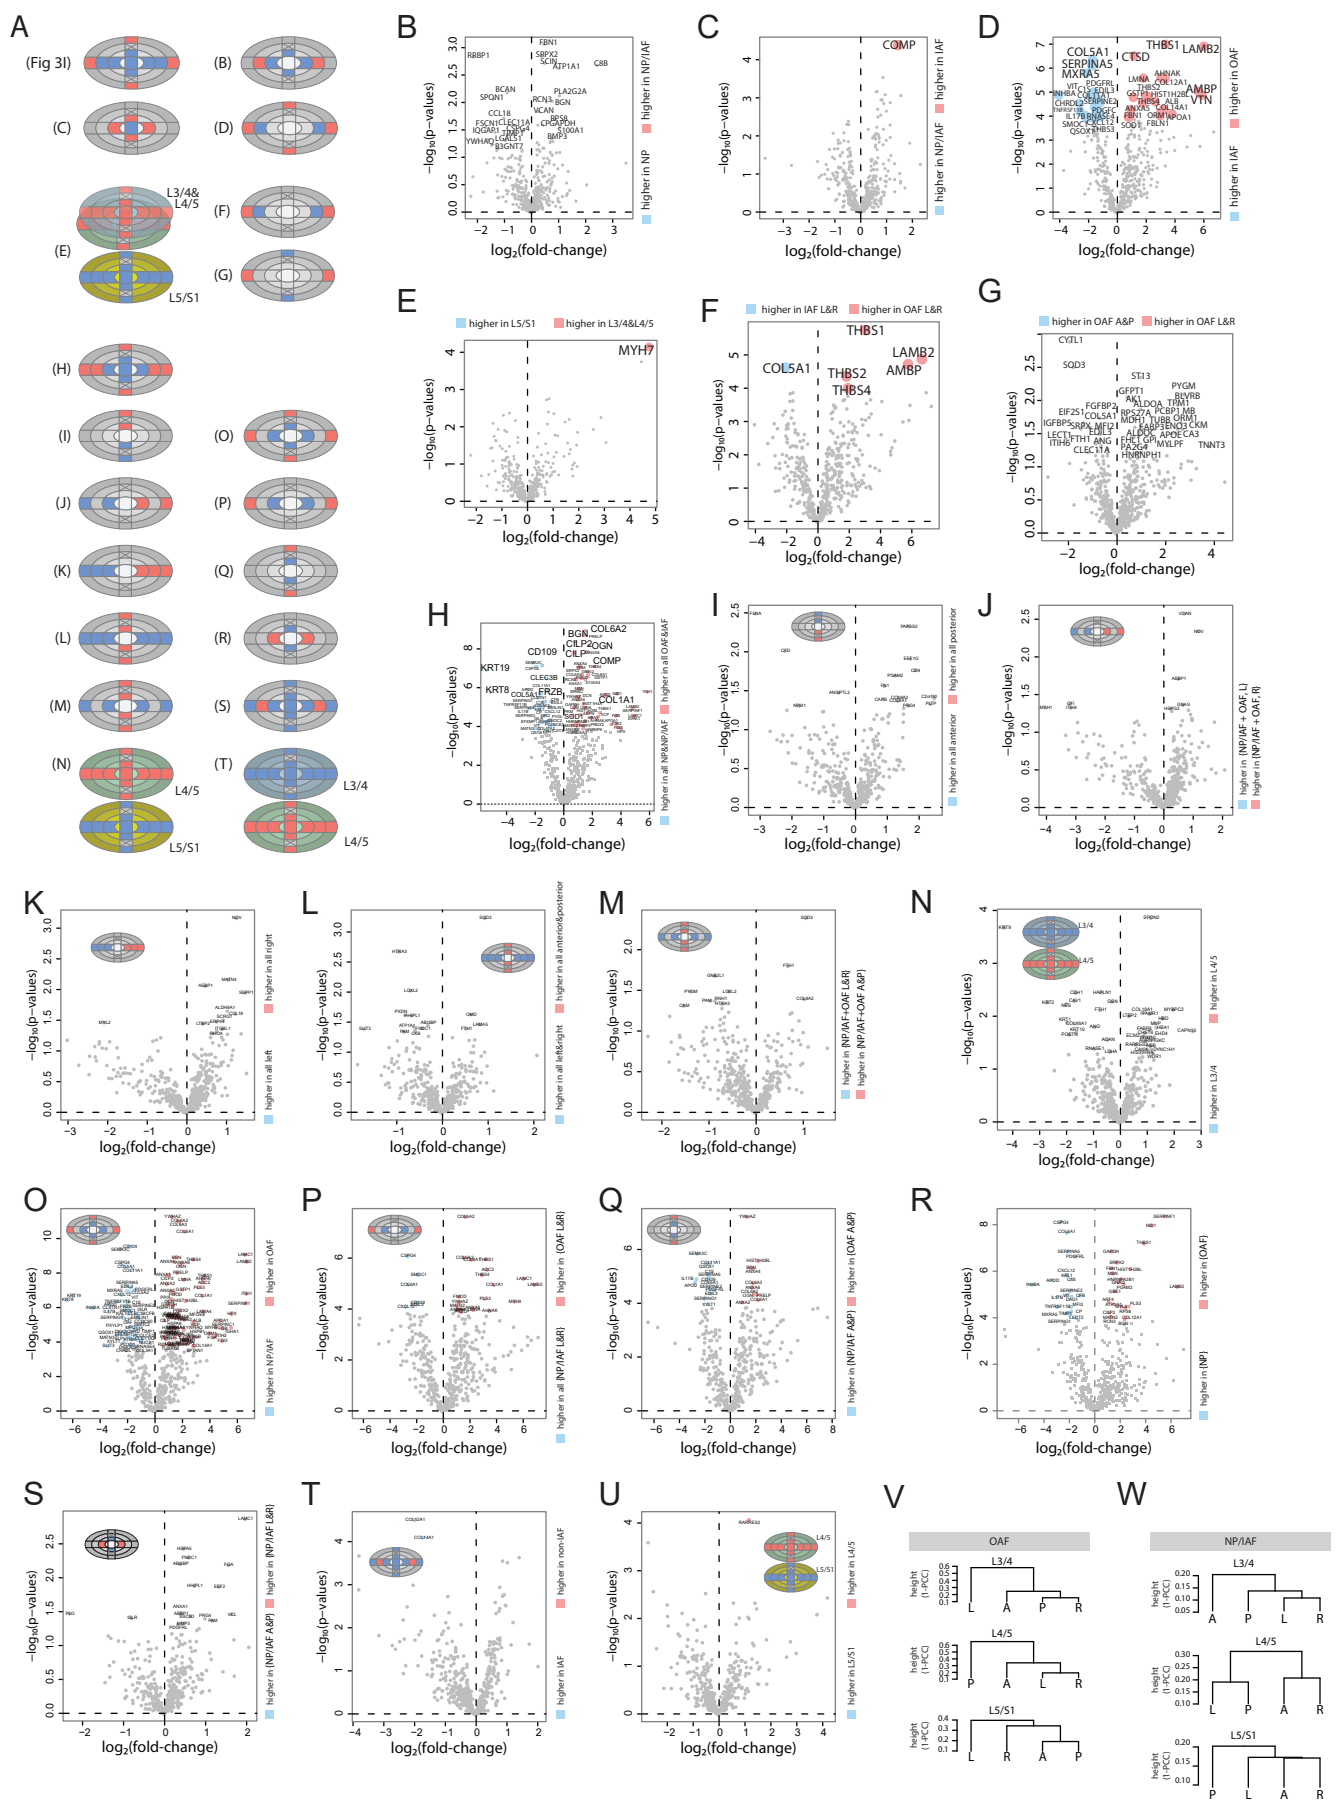

**Figure 3—figure supplement 1. Additional comparisons within the young samples.**

(A) Schematic diagrams showing the comparisons between different groups of samples. (B)-(U), volcano plots showing the differentially expressed proteins for each comparison listed in (A). (V-W) Dendrograms showing the clustering patterns of four samples corresponding to left (L), right (R), anterior (A), and posterior (P) directions, in OAF (V) and NP/IAF (W), respectively.
