# Supplementary material for: DIPPER, a spatiotemporal proteomics atlas of human intervertebral discs for exploring ageing and degeneration dynamics
Source: eLife journal article supplement (doi:10.7554/elife.64940), 2020-12-31
Supplement: supp [file elife_poa_e64940_Figure_3_figure_supplement_2.pdf › elife_poa_e64940_Figure_3_figure_supplement_2.pdf]

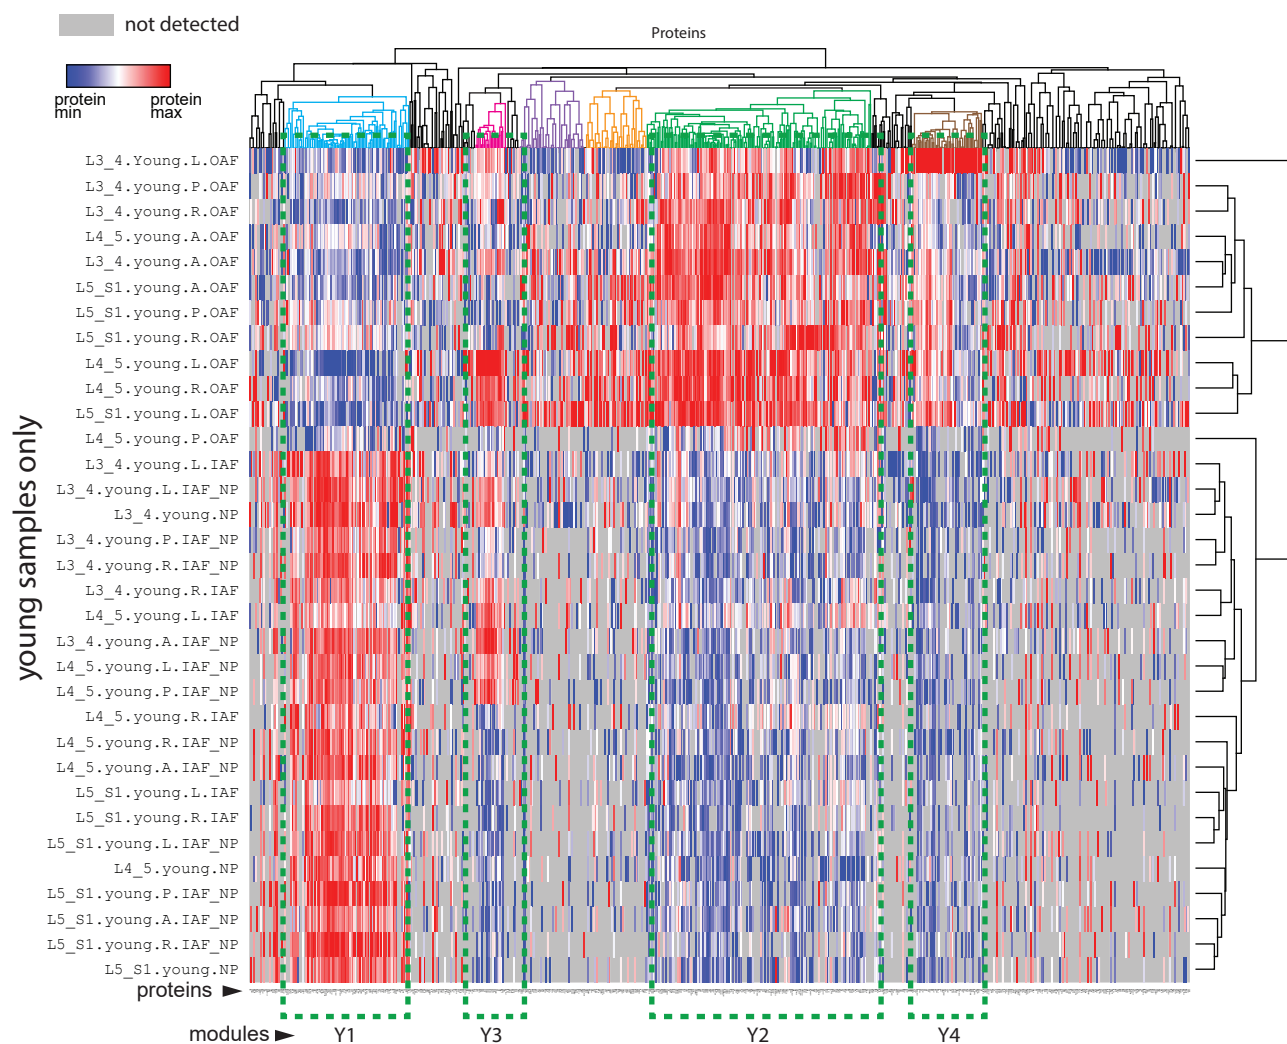

**Figure 3—figure supplement 2. Heatmap of DEPs and protein modules.**

A profile-protein bi-clustering heatmap of 671 differentially expressed proteins identified in 20 two-group comparisons within the young samples. For each of the comparisons, a DEP could come from three sources: statistical comparisons, fold-changes, or exclusive expressions in one group only (Methods). Four protein modules were identified: Y1~Y4.
