# Supplementary material for: DIPPER, a spatiotemporal proteomics atlas of human intervertebral discs for exploring ageing and degeneration dynamics
Source: eLife journal article supplement (doi:10.7554/elife.64940), 2020-12-31
Supplement: supp [file elife_poa_e64940_Figure_4_figure_supplement_1.pdf › elife_poa_e64940_Figure_4_figure_supplement_1.pdf]

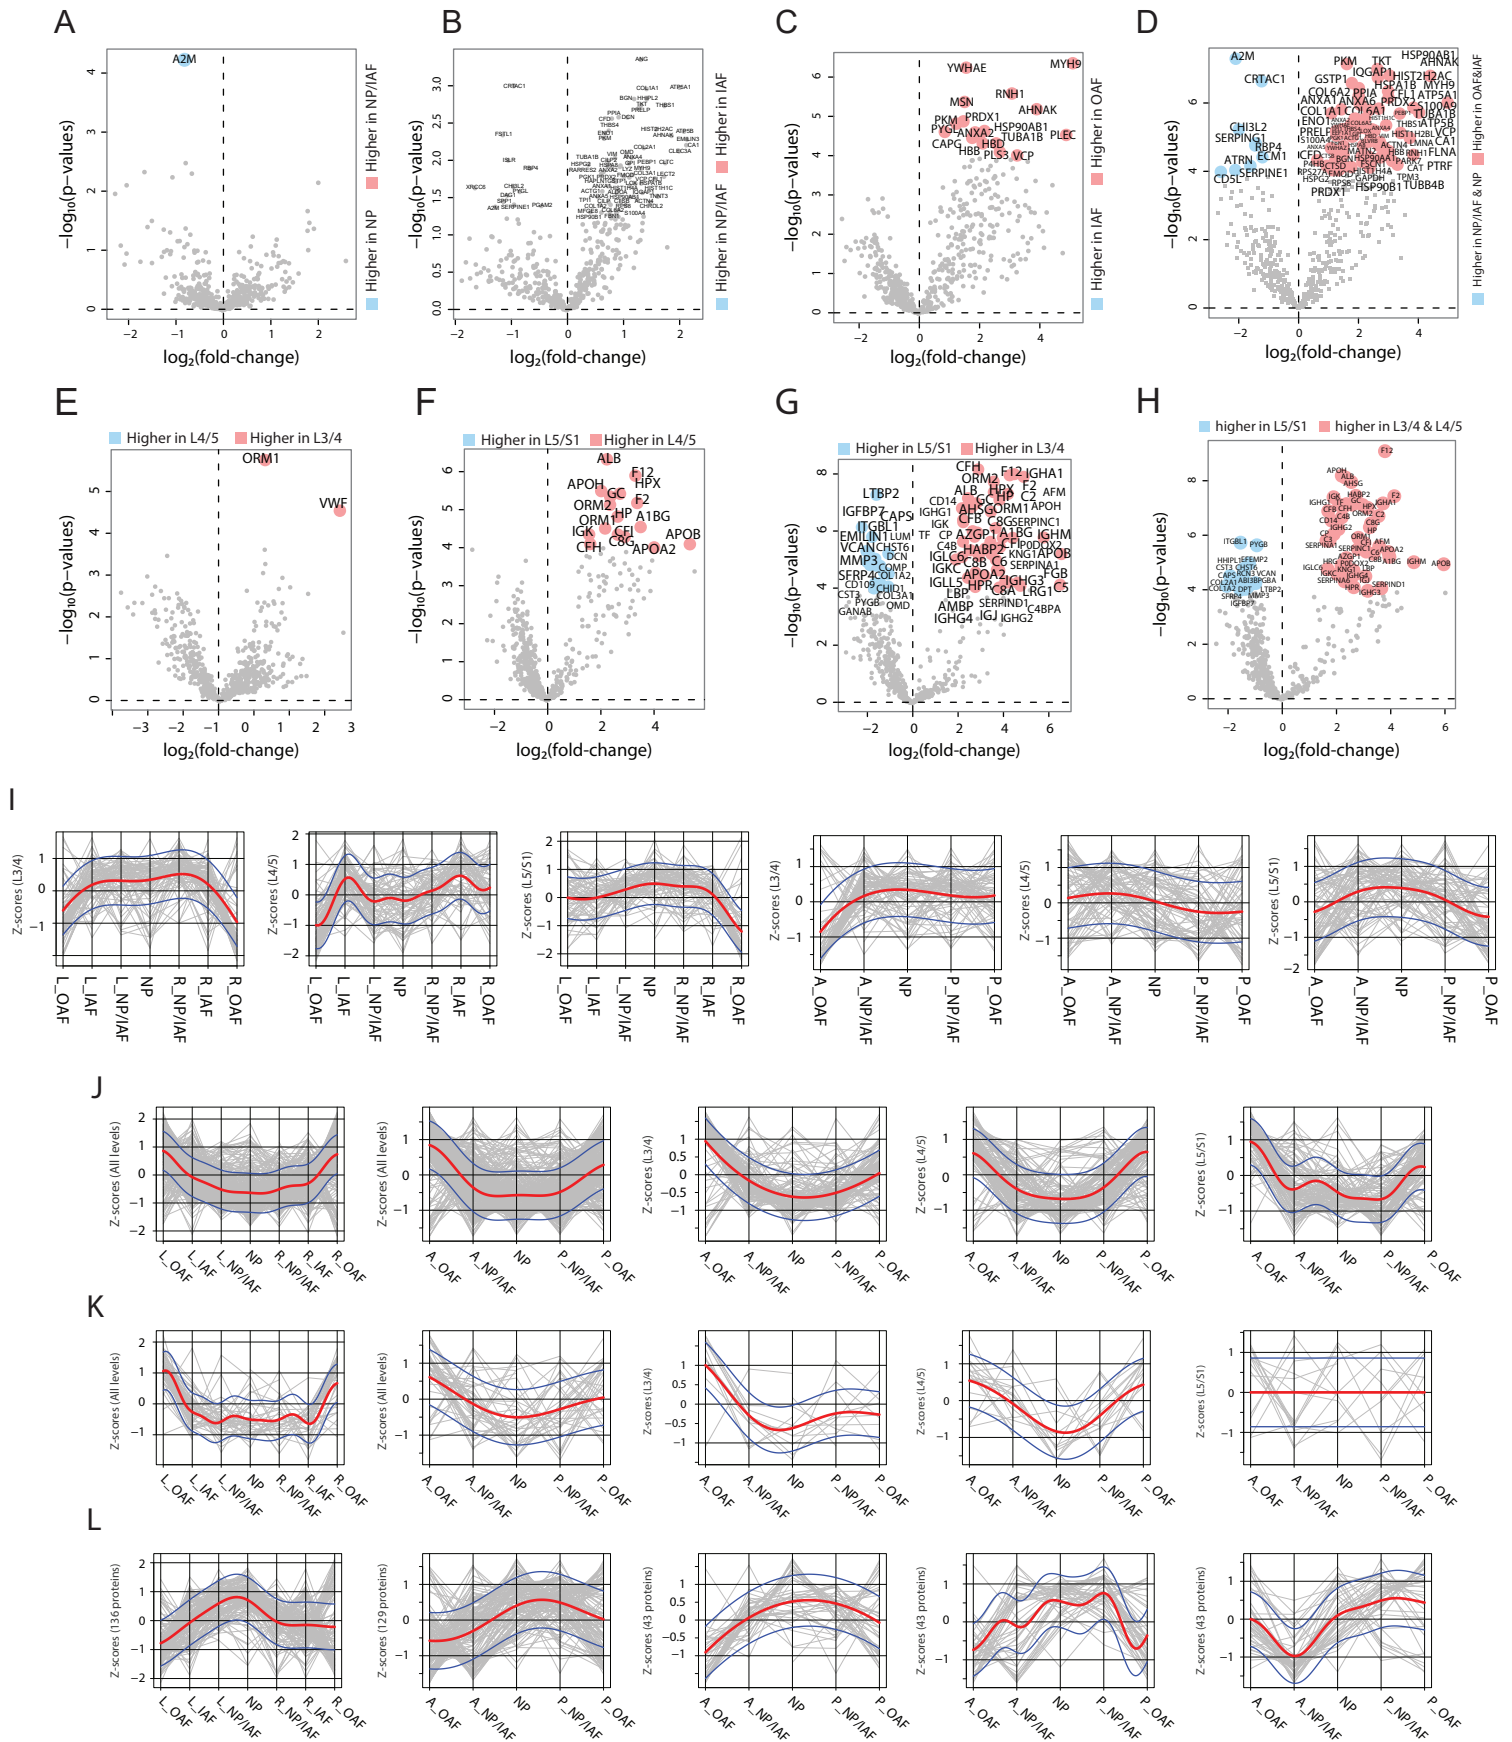

**Figure 4—figure supplement 1. DEPs between different compartments or levels and spatial trends of protein modules in the aged discs.**

(A)–(H) Volcano plots showing the DEPs between different compartments or levels in the aged discs. (A) Volcano plot of DEPs between NP and NP/IAF. (B) Volcano plot of DEPs between NP/IAF and IAF. (C) Volcano plot of DEPs between IAF and OAF. (D) Volcano plot of DEPs between {NP + NP/IAF} and {IAF + OAF}. (E) Volcano plot of DEPs between L4/5 and L3/4. (F) Volcano plot of DEPs between L5/S1 and L4/5. (G) Volcano plot of DEPs between L5/S1 and L3/4. (H) Volcano plot of DEPs between lower level (L5/S1) and upper two levels combined, in the aged discs. (I)–(L), the lateral and anteroposterior trends of the four protein modules identified in **(Figure 3—figure supplement 3)** in the aged discs. (I) module Y1. (J) module Y2. (K) module Y3. (L) module Y4. The red curve is the Gaussian Process Estimation (GPE) trend line, and the blue curves are 1 standard deviation above or below the trend line.
