# Supplementary material for: DIPPER, a spatiotemporal proteomics atlas of human intervertebral discs for exploring ageing and degeneration dynamics
Source: eLife journal article supplement (doi:10.7554/elife.64940), 2020-12-31
Supplement: supp [file elife_poa_e64940_Figure_5_figure_supplement_1.pdf › elife_poa_e64940_Figure_5_figure_supplement_1.pdf]

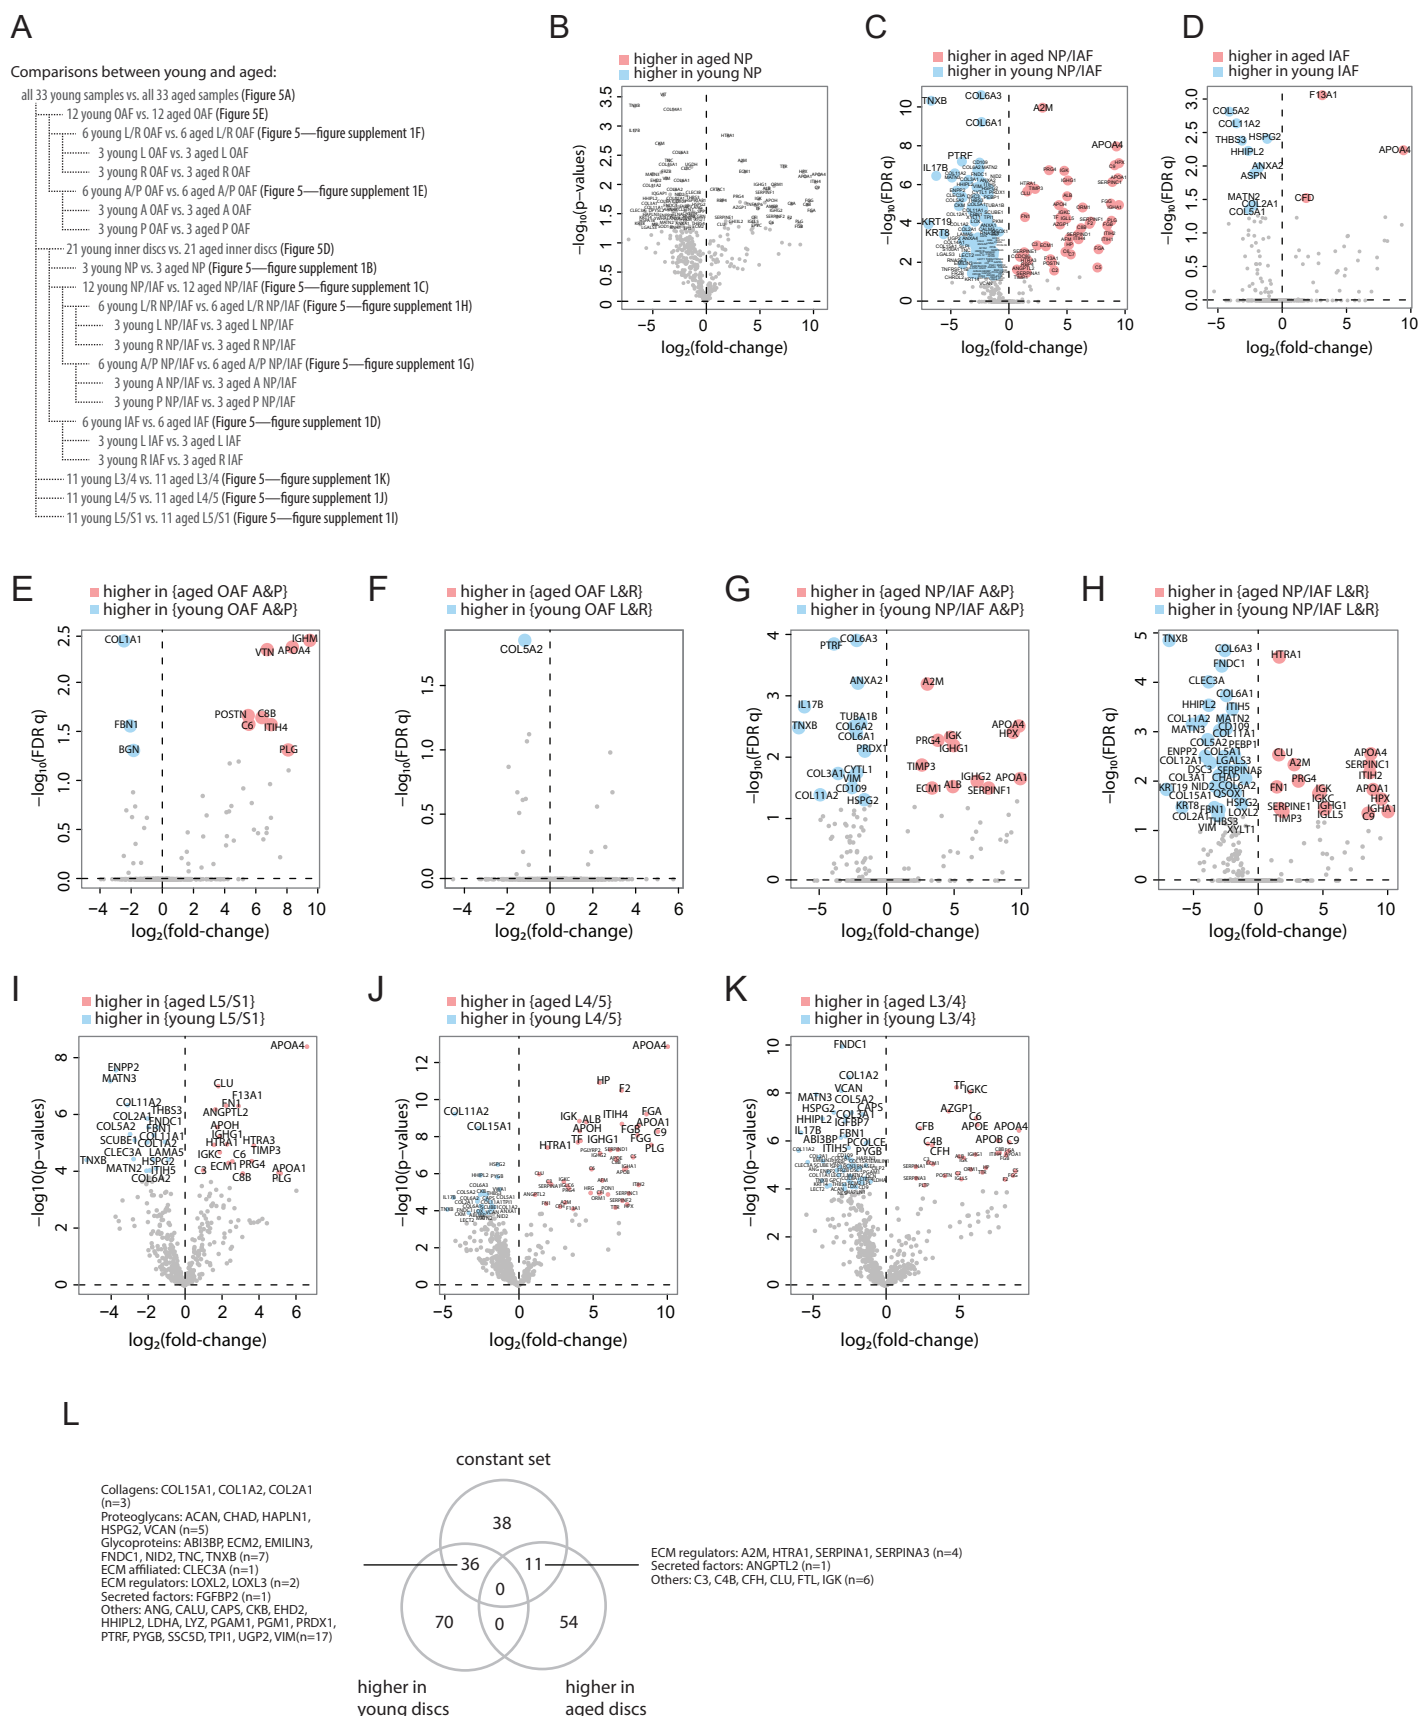

**Figure 5—figure supplement 1. Comparisons of young and aged proteomes.**

(A) Schematic diagrams showing the comparisons between young and aged profiles. (B)–(K) Volcano plots showing the differentially expressed proteins for each comparison listed in (A). (L) Venn diagram showing the overlaps of the DEPs between all young and all aged discs (from Figure 5A) and the constant set in the young discs (Figure 3D).
