# Supplementary material for: DIPPER, a spatiotemporal proteomics atlas of human intervertebral discs for exploring ageing and degeneration dynamics
Source: eLife journal article supplement (doi:10.7554/elife.64940), 2020-12-31
Supplement: supp [file elife_poa_e64940_Figure_7_figure_supplement_2.pdf › elife_poa_e64940_Figure_7_figure_supplement_2.pdf]

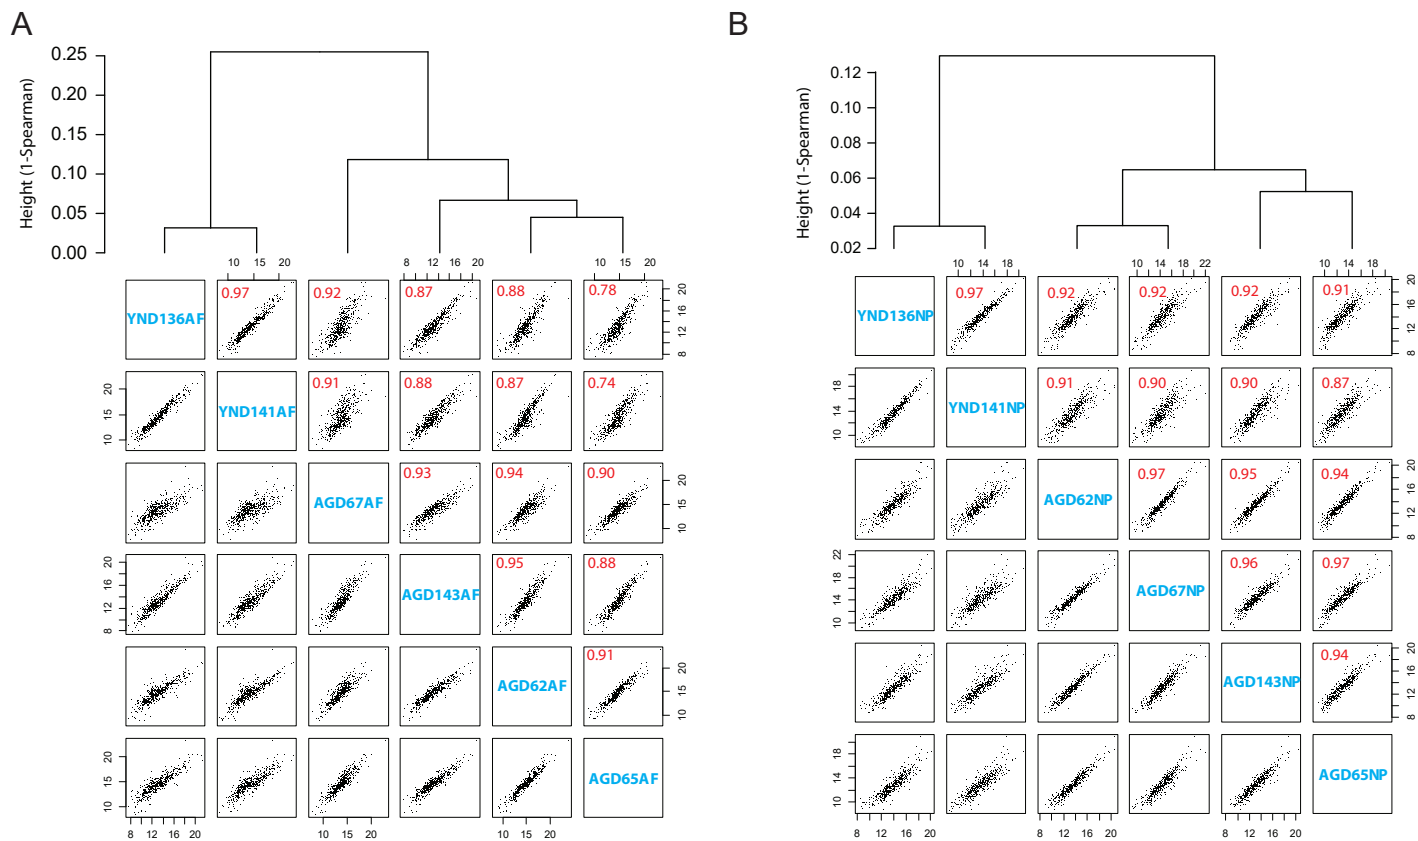

**Figure 7—figure supplement 2. Degradome data.**

(A) Hierarchical cluster (upper panel) and pairwise scatter plot (lower panel) of the degradome profiles in the AF. Numbers in red are the Spearman correlation coefficient. (B) Hierarchical cluster (upper panel) and pairwise scatter plot (lower panel) of the degradome profiles in the NP. Numbers in red are the Spearman correlation coefficient.
