# Supplementary material for: DIPPER, a spatiotemporal proteomics atlas of human intervertebral discs for exploring ageing and degeneration dynamics
Source: eLife. 2020 Dec 31;9:e64940. doi: 10.7554/eLife.64940 (PMC7857729; doi:10.7554/eLife.64940)
Supplement: Supplementary file 2. [file elife-64940-supp2.xlsx]

## Sheet: Summary of datasheets
Supplementary File 2 - Differentially Expressed Proteins (DEPs) detected among comparisons within the young discs only
Comparison No.	Data-Sheet ID	Scope	Approach		Group1	Number of Samples in Group1	Group2	Number of Samples in Group 2	Num of DEPs
1	Sheet 1	Within young profiles only	Fold-change>2	1	inner disc region	21	OAF	12	98
	Sheet 2	Within young profiles only	Exclusively detected in one group only	1	inner disc region	21	OAF	12	24
	Sheet 3	Within young profiles only	Statistical	1	inner disc region	21	OAF	12	154
2	Sheet 4	Within young profiles only	Fold-change>2	2	NP and NP/IAF	15	IAF and OAF	18	83
	Sheet 5	Within young profiles only	Exclusively detected in one group only	2	NP and NP/IAF	15	IAF and OAF	18	10
	Sheet 6	Within young profiles only	Statistical	2	NP and NP/IAF	15	IAF and OAF	18	95
3	Sheet 7	Within young profiles only	Fold-change>2	3	NP, NP/IAF and OAF	27	IAF	6	55
	Sheet 8	Within young profiles only	Exclusively detected in one group only	3	NP, NP/IAF and OAF	27	IAF	6	5
	N/A	Within young profiles only	Statistical	3	NP, NP/IAF and OAF	27	IAF	6	0
4	Sheet 9	Within young profiles only	Fold-change>2	4	L5/S1	11	L4/5	11	58
	N/A	Within young profiles only	Exclusively detected in one group only	4	L5/S1	11	L4/5	11	0
	N/A	Within young profiles only	Statistical	4	L5/S1	11	L4/5	11	0
5	Sheet 10	Within young profiles only	Fold-change>2	5	L5/S1	11	L3/4	11	56
	Sheet 11	Within young profiles only	Exclusively detected in one group only	5	L5/S1	11	L3/4	11	5
	N/A	Within young profiles only	Statistical	5	L5/S1	11	L3/4	11	0
6	Sheet 12	Within young profiles only	Fold-change>2	6	L3/4	11	L4/5	11	51
	Sheet 13	Within young profiles only	Exclusively detected in one group only	6	L3/4	11	L4/5	11	4
	N/A	Within young profiles only	Statistical	6	L3/4	11	L4/5	11	0
7	Sheet 14	Within young profiles only	Fold-change>2	7	L5/S1	11	upper two levels	22	45
	N/A	Within young profiles only	Exclusively detected in one group only	7	L5/S1	11	upper two levels	22	0
	N/A	Within young profiles only	Statistical	7	L5/S1	11	upper two levels	22	0
8	Sheet 15	Within young profiles only	Fold-change>2	8	Anterior & posterior@OAF	6	Left&Right@OAF	6	65
	Sheet 16	Within young profiles only	Exclusively detected in one group only	8	Anterior & posterior@OAF	6	Left&Right@OAF	6	6
	N/A	Within young profiles only	Statistical	8	Anterior & posterior@OAF	6	Left&Right@OAF	6	0
9	Sheet 17	Within young profiles only	Fold-change>2	9	Anterior & posterior@NP/IAF	6	Left&Right@NP/IAF	6	35
	Sheet 18	Within young profiles only	Exclusively detected in one group only	9	Anterior & posterior@NP/IAF	6	Left&Right@NP/IAF	6	4
	N/A	Within young profiles only	Statistical	9	Anterior & posterior@NP/IAF	6	Left&Right@NP/IAF	6	0
10	Sheet 19	Within young profiles only	Fold-change>2	10	Left & Right@IAF	6	Left&Right@OAF	6	153
	Sheet 20	Within young profiles only	Exclusively detected in one group only	10	Left & Right@IAF	6	Left&Right@OAF	6	65
	N/A	Within young profiles only	Statistical	10	Left & Right@IAF	6	Left&Right@OAF	6	0
11	Sheet 21	Within young profiles only	Fold-change>2	11	NP/IAF	12	OAF	12	94
	Sheet 22	Within young profiles only	Exclusively detected in one group only	11	NP/IAF	12	OAF	12	68
	Sheet 23	Within young profiles only	Statistical	11	NP/IAF	12	OAF	12	140
12	Sheet 24	Within young profiles only	Fold-change>2	12	Left&Right@NP/IAF	6	Left&Right@OAF	6	170
	Sheet 25	Within young profiles only	Exclusively detected in one group only	12	Left&Right@NP/IAF	6	Left&Right@OAF	6	101
	Sheet 26	Within young profiles only	Statistical	12	Left&Right@NP/IAF	6	Left&Right@OAF	6	26
13	Sheet 27	Within young profiles only	Fold-change>2	13	Anterior & posterior@NP/IAF	6	Anterior & posterior@OAF	6	140
	Sheet 28	Within young profiles only	Exclusively detected in one group only	13	Anterior & posterior@NP/IAF	6	Anterior & posterior@OAF	6	103
	Sheet 29	Within young profiles only	Statistical	13	Anterior & posterior@NP/IAF	6	Anterior & posterior@OAF	6	25
14	Sheet 30	Within young profiles only	Fold-change>2	14	NP	3	NP/IAF	12	26
	Sheet 31	Within young profiles only	Exclusively detected in one group only	14	NP	3	NP/IAF	12	6
	N/A	Within young profiles only	Statistical	14	NP	3	NP/IAF	12	0
15	Sheet 32	Within young profiles only	Fold-change>2	15	IAF	6	OAF	12	107
	Sheet 33	Within young profiles only	Exclusively detected in one group only	15	IAF	6	OAF	12	54
	Sheet 34	Within young profiles only	Statistical	15	IAF	6	OAF	12	39
16	Sheet 35	Within young profiles only	Fold-change>2	16	NP	3	OAF	12	119
	Sheet 36	Within young profiles only	Exclusively detected in one group only	16	NP	3	OAF	12	126
	Sheet 37	Within young profiles only	Statistical	16	NP	3	OAF	12	44
17	Sheet 38	Within young profiles only	Fold-change>2	17	All left	9	All right	9	58
	Sheet 39	Within young profiles only	Exclusively detected in one group only	17	All left	9	All right	9	7
	N/A	Within young profiles only	Statistical	17	All left	9	All right	9	0
18	Sheet 40	Within young profiles only	Fold-change>2	18	Left@NP/IAF,OAF	6	Right@NP/IAF,OAF	6	72
	Sheet 41	Within young profiles only	Exclusively detected in one group only	18	Left@NP/IAF,OAF	6	Right@NP/IAF,OAF	6	6
	N/A	Within young profiles only	Statistical	18	Left@NP/IAF,OAF	6	Right@NP/IAF,OAF	6	0
19	Sheet 42	Within young profiles only	Fold-change>2	19	All left and right	18	All anterior and posterior	12	32
	N/A	Within young profiles only	Exclusively detected in one group only	19	All left and right	18	All anterior and posterior	12	0
	N/A	Within young profiles only	Statistical	19	All left and right	18	All anterior and posterior	12	0
20	Sheet 43	Within young profiles only	Fold-change>2	20	All anterior	6	All posterior	6	49
	Sheet 44	Within young profiles only	Exclusively detected in one group only	20	All anterior	6	All posterior	6	5
	N/A	Within young profiles only	Statistical	20	All anterior	6	All posterior	6	0
21	Sheet 45	Within young profiles only	Fold-change>2	21	Left & right@NP/IAF,OAF	12	Anterior & posterior@NP/IAF,OAF	12	42
	Sheet 46	Within young profiles only	Exclusively detected in one group only	21	Left & right@NP/IAF,OAF	12	Anterior & posterior@NP/IAF,OAF	12	1
	N/A	Within young profiles only	Statistical	21	Left & right@NP/IAF,OAF	12	Anterior & posterior@NP/IAF,OAF	12	0

## Sheet: Sheet1
gene	status	group1	group2	Num of samples in group1	Num of samples in group2	average log2(LFQ) in group1	average log2(LFQ) in group2	log2(Fold change)	Num of valid values in group1	Num of valid values in group2
ADD3	higher in inner disc region	inner disc region	OAF	21	12	27.1455	25.1413	2.00417	3	3
ATP6V1E1	higher in inner disc region	inner disc region	OAF	21	12	27.847	25.7496	2.0974	2	3
CCL18	higher in inner disc region	inner disc region	OAF	21	12	29.5147	27.4507	2.06395	21	3
CLSTN2	higher in inner disc region	inner disc region	OAF	21	12	27.9202	25.5221	2.39811	16	1
CYFIP1	higher in inner disc region	inner disc region	OAF	21	12	26.1985	23.8036	2.3949	1	1
DPP4	higher in inner disc region	inner disc region	OAF	21	12	27.0455	24.9719	2.07359	9	2
DSP	higher in inner disc region	inner disc region	OAF	21	12	32.1436	29.9878	2.1558	1	2
EIF5	higher in inner disc region	inner disc region	OAF	21	12	27.1762	24.8254	2.3508	1	1
EPHX1	higher in inner disc region	inner disc region	OAF	21	12	30.5419	25.3065	5.2354	1	1
GGT2	higher in inner disc region	inner disc region	OAF	21	12	28.617	25.7038	2.9132	2	2
H3F3A	higher in inner disc region	inner disc region	OAF	21	12	29.0314	27.0303	2.00112	14	5
HYAL1	higher in inner disc region	inner disc region	OAF	21	12	27.4571	24.1437	3.3134	1	1
IGLV6-57	higher in inner disc region	inner disc region	OAF	21	12	29.138	26.9274	2.2106	1	1
MECP2	higher in inner disc region	inner disc region	OAF	21	12	28.8251	25.6584	3.16671	1	9
PHB2	higher in inner disc region	inner disc region	OAF	21	12	26.8573	24.7584	2.0989	1	4
PROS1	higher in inner disc region	inner disc region	OAF	21	12	27.4625	25.3775	2.08499	19	5
TIMP3	higher in inner disc region	inner disc region	OAF	21	12	29.0638	26.5446	2.51929	21	7
TPR	higher in inner disc region	inner disc region	OAF	21	12	26.5691	24.3764	2.1927	1	1
VAPA	higher in inner disc region	inner disc region	OAF	21	12	25.7617	23.1997	2.562	1	1
XYLT1	higher in inner disc region	inner disc region	OAF	21	12	31.7575	29.6906	2.06692	21	12
A1BG	higher in OAF	inner disc region	OAF	21	12	22.6314	26.4797	-3.84831	6	10
ADH1B	higher in OAF	inner disc region	OAF	21	12	24.3026	26.5131	-2.21048	6	3
AKR1B1	higher in OAF	inner disc region	OAF	21	12	22.9081	25.8175	-2.90944	1	7
AKR1C3	higher in OAF	inner disc region	OAF	21	12	24.106	26.7536	-2.6476	2	3
ALDH1A1	higher in OAF	inner disc region	OAF	21	12	23.0328	25.686	-2.65311	2	7
AMBP	higher in OAF	inner disc region	OAF	21	12	25.4269	31.0635	-5.63654	10	12
APOA4	higher in OAF	inner disc region	OAF	21	12	24.4	26.404	-2.00399	20	12
APOBEC2	higher in OAF	inner disc region	OAF	21	12	23.8204	25.9745	-2.1541	1	7
APOC1	higher in OAF	inner disc region	OAF	21	12	26.0861	28.8483	-2.76218	4	5
APOC3	higher in OAF	inner disc region	OAF	21	12	24.5883	26.8116	-2.22326	2	7
BLVRB	higher in OAF	inner disc region	OAF	21	12	24.8051	27.3525	-2.54738	3	10
C1QB	higher in OAF	inner disc region	OAF	21	12	25.7001	27.7288	-2.02873	1	4
C4A	higher in OAF	inner disc region	OAF	21	12	27.4091	30.3934	-2.9843	1	1
C4BPA	higher in OAF	inner disc region	OAF	21	12	23.7619	25.9285	-2.16659	10	10
C8A	higher in OAF	inner disc region	OAF	21	12	21.9354	24.9777	-3.04229	8	9
C8G	higher in OAF	inner disc region	OAF	21	12	23.9908	26.6101	-2.61929	6	10
C9	higher in OAF	inner disc region	OAF	21	12	23.3982	26.9886	-3.59043	17	11
CA1	higher in OAF	inner disc region	OAF	21	12	26.2443	29.2333	-2.98897	10	12
CA2	higher in OAF	inner disc region	OAF	21	12	25.052	27.7908	-2.73876	8	10
CD5L	higher in OAF	inner disc region	OAF	21	12	25.887	28.3085	-2.42145	6	1
CDSN	higher in OAF	inner disc region	OAF	21	12	25.0984	28.3512	-3.2528	1	1
CHD9	higher in OAF	inner disc region	OAF	21	12	25.5276	27.905	-2.3774	3	11
CKMT2	higher in OAF	inner disc region	OAF	21	12	20.4733	23.962	-3.48869	2	5
CMPK1	higher in OAF	inner disc region	OAF	21	12	24.9834	27.5813	-2.59793	1	4
COL4A2	higher in OAF	inner disc region	OAF	21	12	23.9986	27.9649	-3.96638	2	11
CRIP2	higher in OAF	inner disc region	OAF	21	12	24.8049	27.0845	-2.2796	2	8
CRP	higher in OAF	inner disc region	OAF	21	12	24.4352	28.8529	-4.41765	1	2
CTSB	higher in OAF	inner disc region	OAF	21	12	24.6889	26.7304	-2.04148	8	8
CTSG	higher in OAF	inner disc region	OAF	21	12	25.4437	27.741	-2.29725	1	2
DDAH2	higher in OAF	inner disc region	OAF	21	12	24.0256	26.3161	-2.29049	1	7
ENO3	higher in OAF	inner disc region	OAF	21	12	26.4604	29.0261	-2.56572	19	10
F11	higher in OAF	inner disc region	OAF	21	12	24.5935	27.4918	-2.8983	1	1
F2	higher in OAF	inner disc region	OAF	21	12	23.5651	26.1509	-2.58585	18	12
FBLN1	higher in OAF	inner disc region	OAF	21	12	28.4857	30.6109	-2.12517	21	12
FLNA	higher in OAF	inner disc region	OAF	21	12	26.6622	28.9139	-2.25162	19	12
GC	higher in OAF	inner disc region	OAF	21	12	24.6845	29.8114	-5.12693	9	11
HNRNPA1	higher in OAF	inner disc region	OAF	21	12	24.7545	27.0024	-2.24791	3	11
HRG	higher in OAF	inner disc region	OAF	21	12	23.6592	27.4966	-3.83742	10	10
HSPD1	higher in OAF	inner disc region	OAF	21	12	23.8331	25.9825	-2.14948	2	7
IDH2	higher in OAF	inner disc region	OAF	21	12	23.1623	25.438	-2.27569	8	8
IGFBP6	higher in OAF	inner disc region	OAF	21	12	23.2088	26.9539	-3.74507	1	8
IGHG1	higher in OAF	inner disc region	OAF	21	12	31.1254	33.2447	-2.1193	21	12
IGHG2	higher in OAF	inner disc region	OAF	21	12	26.1727	29.0199	-2.84717	11	12
IGHG3	higher in OAF	inner disc region	OAF	21	12	25.1793	27.9973	-2.81805	6	8
IGHM	higher in OAF	inner disc region	OAF	21	12	22.7839	25.3562	-2.57233	6	10
IGHV5-51	higher in OAF	inner disc region	OAF	21	12	26.1437	28.3971	-2.2534	1	1
IGKV4-1	higher in OAF	inner disc region	OAF	21	12	26.0807	29.5359	-3.4552	1	1
ITIH1	higher in OAF	inner disc region	OAF	21	12	22.6581	28.9573	-6.29917	10	12
KNG1	higher in OAF	inner disc region	OAF	21	12	26.0464	28.2797	-2.23339	2	11
LAMA2	higher in OAF	inner disc region	OAF	21	12	24.5174	27.2628	-2.74538	5	11
LAMB1	higher in OAF	inner disc region	OAF	21	12	24.4851	27.813	-3.32795	9	12
LRG1	higher in OAF	inner disc region	OAF	21	12	23.976	26.1183	-2.14231	2	8
MAMDC2	higher in OAF	inner disc region	OAF	21	12	25.3477	27.7074	-2.35964	8	11
MPO	higher in OAF	inner disc region	OAF	21	12	24.5464	26.7002	-2.15375	3	4
MYH11	higher in OAF	inner disc region	OAF	21	12	23.7129	26.8165	-3.10358	20	12
MYL12A	higher in OAF	inner disc region	OAF	21	12	24.1697	27.2338	-3.06412	2	10
MYL6B	higher in OAF	inner disc region	OAF	21	12	24.1733	27.0126	-2.83928	13	8
MYOC	higher in OAF	inner disc region	OAF	21	12	24.0557	28.0362	-3.98044	6	9
NID1	higher in OAF	inner disc region	OAF	21	12	24.9894	28.9589	-3.96943	10	12
NT5E	higher in OAF	inner disc region	OAF	21	12	25.8334	27.8975	-2.06409	6	12
ORM2	higher in OAF	inner disc region	OAF	21	12	26.4333	29.2452	-2.81183	4	11
PLEC	higher in OAF	inner disc region	OAF	21	12	25.7363	28.3306	-2.59438	21	12
PLG	higher in OAF	inner disc region	OAF	21	12	23.5565	26.425	-2.86845	15	12
PLIN4	higher in OAF	inner disc region	OAF	21	12	23.6095	26.7185	-3.109	1	2
PRPH	higher in OAF	inner disc region	OAF	21	12	24.0069	26.2869	-2.28007	2	6
RPL11	higher in OAF	inner disc region	OAF	21	12	22.759	25.8471	-3.08812	1	4
RPS2	higher in OAF	inner disc region	OAF	21	12	19.9458	25.1837	-5.23795	1	8
S100A9	higher in OAF	inner disc region	OAF	21	12	23.9066	26.5765	-2.66993	4	11
SDHA	higher in OAF	inner disc region	OAF	21	12	21.6972	24.4046	-2.7074	1	1
SERPINA7	higher in OAF	inner disc region	OAF	21	12	24.8669	28.0741	-3.2072	1	1
SOD2	higher in OAF	inner disc region	OAF	21	12	26.4968	28.5901	-2.09335	16	11
SPTAN1	higher in OAF	inner disc region	OAF	21	12	25.368	27.9444	-2.57644	20	12
TAGLN2	higher in OAF	inner disc region	OAF	21	12	25.9433	28.1778	-2.23453	7	11
TPM2	higher in OAF	inner disc region	OAF	21	12	27.7712	29.784	-2.01272	15	10
TPM3	higher in OAF	inner disc region	OAF	21	12	27.9223	30.2201	-2.29781	19	12
TTR	higher in OAF	inner disc region	OAF	21	12	25.2325	29.1736	-3.94118	9	11
TUFM	higher in OAF	inner disc region	OAF	21	12	23.2002	25.6727	-2.47248	1	6
VTN	higher in OAF	inner disc region	OAF	21	12	23.7683	29.9819	-6.21357	10	12

## Sheet: Sheet2
gene	status	group1	group2	Num of samples in group1	Num of samples in group2	Num of valid values in group1	Num of valid values in group2
HHIP	exclusive in inner disc region	inner disc region	OAF	21	12	16	0
S100A6	exclusive in inner disc region	inner disc region	OAF	21	12	17	0
ALDH2	exclusive in OAF	inner disc region	OAF	21	12	0	8
APEX1	exclusive in OAF	inner disc region	OAF	21	12	0	7
APOA2	exclusive in OAF	inner disc region	OAF	21	12	0	8
C1QBP	exclusive in OAF	inner disc region	OAF	21	12	0	7
CD47	exclusive in OAF	inner disc region	OAF	21	12	0	9
GLOD4	exclusive in OAF	inner disc region	OAF	21	12	0	7
GPX1	exclusive in OAF	inner disc region	OAF	21	12	0	7
H2AFY	exclusive in OAF	inner disc region	OAF	21	12	0	8
HEBP2	exclusive in OAF	inner disc region	OAF	21	12	0	8
HNRNPH3	exclusive in OAF	inner disc region	OAF	21	12	0	7
LTBP1	exclusive in OAF	inner disc region	OAF	21	12	0	8
MFAP4	exclusive in OAF	inner disc region	OAF	21	12	0	12
NAGK	exclusive in OAF	inner disc region	OAF	21	12	0	8
NAP1L1	exclusive in OAF	inner disc region	OAF	21	12	0	8
NFIC	exclusive in OAF	inner disc region	OAF	21	12	0	7
OLFML1	exclusive in OAF	inner disc region	OAF	21	12	0	10
PARVA	exclusive in OAF	inner disc region	OAF	21	12	0	8
PRKAR1A	exclusive in OAF	inner disc region	OAF	21	12	0	9
PURA	exclusive in OAF	inner disc region	OAF	21	12	0	9
SRSF7	exclusive in OAF	inner disc region	OAF	21	12	0	7
TNMD	exclusive in OAF	inner disc region	OAF	21	12	0	9
XRCC5	exclusive in OAF	inner disc region	OAF	21	12	0	8

## Sheet: Sheet3
gene	status	group1	group2	Num of samples in group1	Num of samples in group2	average log2(LFQ) in group1	average log2(LFQ) in group2	log2(Fold change)	Num of valid values in group1	Num of valid values in group2	p-value
ACTG1	higher in OAF	inner disc region	OAF	21	12	31.2446	32.6427	-1.3981	21	12	7.4967e-07
ACTN1	higher in OAF	inner disc region	OAF	21	12	26.2669	28.9244	-2.65749	18	12	5.85006e-08
ACTN4	higher in OAF	inner disc region	OAF	21	12	28.1074	29.6625	-1.55508	21	12	7.17589e-05
AHNAK	higher in OAF	inner disc region	OAF	21	12	28.9838	32.2852	-3.30137	21	12	1.39744e-08
ALB	higher in OAF	inner disc region	OAF	21	12	34.0834	36.8708	-2.78743	21	12	9.11904e-06
ALDOA	higher in OAF	inner disc region	OAF	21	12	29.9328	31.3193	-1.38648	21	12	5.09065e-05
ANXA1	higher in OAF	inner disc region	OAF	21	12	32.4931	33.3966	-0.903507	21	12	1.59472e-07
ANXA2	higher in OAF	inner disc region	OAF	21	12	33.2206	34.0907	-0.870106	21	12	3.38014e-08
ANXA4	higher in OAF	inner disc region	OAF	21	12	31.0284	32.2608	-1.23234	21	12	3.77998e-09
ANXA5	higher in OAF	inner disc region	OAF	21	12	31.8352	33.0915	-1.25623	21	12	8.2762e-09
ANXA6	higher in OAF	inner disc region	OAF	21	12	29.1339	30.8351	-1.7012	21	12	1.3397e-10
AOC2	higher in OAF	inner disc region	OAF	21	12	25.2113	28.5938	-3.3825	15	12	5.73667e-09
APOA1	higher in OAF	inner disc region	OAF	21	12	27.1185	31.5221	-4.4036	21	12	1.449e-05
APOD	higher in inner disc region	inner disc region	OAF	21	12	33.9873	31.0333	2.95397	21	12	1.59921e-06
ARF1	higher in OAF	inner disc region	OAF	21	12	26.6283	27.7236	-1.09525	15	12	3.71935e-06
ARF4	higher in OAF	inner disc region	OAF	21	12	26.8908	28.0414	-1.15063	19	12	0.000111966
ATP5B	higher in OAF	inner disc region	OAF	21	12	26.8258	29.6589	-2.83312	21	12	2.24927e-06
ATRN	higher in inner disc region	inner disc region	OAF	21	12	28.8181	27.1489	1.66915	21	10	8.20041e-05
AZGP1	higher in OAF	inner disc region	OAF	21	12	26.5809	28.6995	-2.11861	17	11	1.26883e-05
BGN	higher in OAF	inner disc region	OAF	21	12	37.2399	38.6915	-1.45162	21	12	2.28786e-09
C1S	higher in inner disc region	inner disc region	OAF	21	12	32.0085	30.2199	1.78858	21	12	1.53093e-06
CALM3	higher in OAF	inner disc region	OAF	21	12	29.3054	30.4939	-1.18843	19	12	1.0251e-06
CALR	higher in OAF	inner disc region	OAF	21	12	26.4496	29.0012	-2.55163	19	12	8.4336e-05
CAP1	higher in OAF	inner disc region	OAF	21	12	24.4831	27.452	-2.96886	12	11	4.55287e-08
CCDC80	higher in inner disc region	inner disc region	OAF	21	12	32.5221	31.698	0.824127	21	12	2.43831e-06
CD109	higher in inner disc region	inner disc region	OAF	21	12	32.5806	30.9443	1.63632	21	12	9.52623e-10
CFB	higher in inner disc region	inner disc region	OAF	21	12	32.008	30.9688	1.03921	21	12	1.25122e-05
CFL1	higher in OAF	inner disc region	OAF	21	12	27.618	29.341	-1.72294	19	12	5.79043e-06
CHRD	higher in inner disc region	inner disc region	OAF	21	12	28.1804	26.8129	1.36754	19	8	2.53186e-05
CHRDL2	higher in inner disc region	inner disc region	OAF	21	12	31.1839	28.9303	2.25357	21	12	0.000102108
CILP	higher in OAF	inner disc region	OAF	21	12	36.3532	36.9469	-0.593726	21	12	0.000103438
CILP2	higher in OAF	inner disc region	OAF	21	12	35.7101	36.5073	-0.79719	21	12	7.58316e-08
CLEC3B	higher in inner disc region	inner disc region	OAF	21	12	31.2601	30.1619	1.09824	21	12	6.62037e-06
CLIC1	higher in OAF	inner disc region	OAF	21	12	26.3065	28.0868	-1.78037	12	11	4.51226e-05
CLSTN1	higher in inner disc region	inner disc region	OAF	21	12	29.1871	27.145	2.04209	21	11	1.47279e-06
COL11A1	higher in inner disc region	inner disc region	OAF	21	12	33.0836	31.643	1.44061	21	12	1.28487e-08
COL11A2	higher in inner disc region	inner disc region	OAF	21	12	35.8379	34.6665	1.17138	21	12	0.000108841
COL12A1	higher in OAF	inner disc region	OAF	21	12	32.2895	35.0272	-2.73763	21	12	2.19049e-05
COL14A1	higher in OAF	inner disc region	OAF	21	12	31.0895	34.0505	-2.96101	21	12	0.000113322
COL1A1	higher in OAF	inner disc region	OAF	21	12	32.2236	35.6107	-3.38706	21	12	8.17776e-10
COL3A1	higher in inner disc region	inner disc region	OAF	21	12	32.1897	30.6391	1.55063	21	12	0.00010752
COL5A1	higher in inner disc region	inner disc region	OAF	21	12	31.671	29.6866	1.98448	21	12	9.02981e-09
COL5A2	higher in inner disc region	inner disc region	OAF	21	12	31.4018	29.6529	1.74887	21	12	2.7013e-11
COL6A1	higher in OAF	inner disc region	OAF	21	12	35.9962	38.0328	-2.03658	21	12	2.79219e-11
COL6A2	higher in OAF	inner disc region	OAF	21	12	35.4483	37.0675	-1.61925	21	12	2.90736e-12
COL6A3	higher in OAF	inner disc region	OAF	21	12	37.4058	39.0221	-1.61625	21	12	4.47503e-12
COMP	higher in OAF	inner disc region	OAF	21	12	38.5778	39.626	-1.04812	21	12	4.18285e-05
CP	higher in inner disc region	inner disc region	OAF	21	12	33.6851	31.6845	2.00053	21	12	1.23168e-05
CPQ	higher in inner disc region	inner disc region	OAF	21	12	26.8663	25.9086	0.957674	17	7	3.97689e-05
CSPG4	higher in inner disc region	inner disc region	OAF	21	12	32.0948	29.9202	2.1746	21	12	3.5391e-09
CTSD	higher in OAF	inner disc region	OAF	21	12	26.6812	28.1855	-1.5043	12	11	5.05722e-06
CXCL12	higher in inner disc region	inner disc region	OAF	21	12	29.8784	27.6838	2.19457	21	11	2.59272e-07
DCN	higher in OAF	inner disc region	OAF	21	12	36.4167	37.4732	-1.05652	21	12	1.04836e-06
DKK3	higher in inner disc region	inner disc region	OAF	21	12	29.2389	26.7644	2.4745	21	9	3.81076e-05
DPYSL3	higher in OAF	inner disc region	OAF	21	12	25.1262	28.2676	-3.14138	13	11	5.91329e-05
EDIL3	higher in inner disc region	inner disc region	OAF	21	12	31.8043	30.1677	1.63659	21	12	1.31929e-07
EMILIN1	higher in inner disc region	inner disc region	OAF	21	12	31.1212	30.1156	1.0056	21	12	5.79264e-06
FBN1	higher in OAF	inner disc region	OAF	21	12	32.1213	33.0382	-0.916892	21	12	1.62034e-05
FGA	higher in OAF	inner disc region	OAF	21	12	25.3137	29.7421	-4.4284	21	12	3.90179e-05
FGB	higher in OAF	inner disc region	OAF	21	12	25.9464	30.467	-4.52058	21	12	4.0388e-05
FGG	higher in OAF	inner disc region	OAF	21	12	25.9037	30.3768	-4.47302	20	12	0.000132083
FMOD	higher in OAF	inner disc region	OAF	21	12	36.2605	37.6654	-1.4049	21	12	1.17601e-07
FRZB	higher in inner disc region	inner disc region	OAF	21	12	31.1158	29.2363	1.87944	21	12	3.40562e-06
GALNT2	higher in inner disc region	inner disc region	OAF	21	12	29.5297	27.7964	1.73334	21	9	7.98084e-05
GAPDH	higher in OAF	inner disc region	OAF	21	12	32.086	33.0904	-1.0044	21	12	4.9483e-07
GDI2	higher in OAF	inner disc region	OAF	21	12	26.8135	28.5085	-1.695	17	12	2.78387e-06
GNAI2	higher in OAF	inner disc region	OAF	21	12	26.6809	28.2509	-1.57002	17	12	2.42457e-06
GSTP1	higher in OAF	inner disc region	OAF	21	12	28.0776	29.9005	-1.82292	20	12	1.08677e-09
HBA1	higher in OAF	inner disc region	OAF	21	12	32.0151	33.998	-1.98283	21	12	8.95899e-05
HBB	higher in OAF	inner disc region	OAF	21	12	33.8633	35.8686	-2.00533	21	12	1.42326e-05
HIST1H2BL	higher in OAF	inner disc region	OAF	21	12	29.7057	31.9844	-2.27872	21	12	4.27647e-07
HIST1H4A	higher in OAF	inner disc region	OAF	21	12	30.6254	32.2523	-1.62693	21	12	5.05104e-07
HIST2H2AC	higher in OAF	inner disc region	OAF	21	12	28.2757	30.7856	-2.50985	19	11	4.1545e-05
HNRNPA2B1	higher in OAF	inner disc region	OAF	21	12	26.7383	28.54	-1.80164	15	12	2.48746e-06
HPX	higher in OAF	inner disc region	OAF	21	12	24.8474	30.1311	-5.28372	16	12	1.78425e-06
HSP90AA1	higher in OAF	inner disc region	OAF	21	12	28.8567	30.1541	-1.29746	21	12	2.59305e-05
HSP90B1	higher in OAF	inner disc region	OAF	21	12	29.1178	30.115	-0.997196	21	12	6.14077e-06
HSPA1B	higher in OAF	inner disc region	OAF	21	12	29.1349	30.6143	-1.4794	21	12	4.12197e-10
HSPA8	higher in OAF	inner disc region	OAF	21	12	28.771	30.1723	-1.40128	21	12	1.75561e-06
HSPB1	higher in OAF	inner disc region	OAF	21	12	27.7221	29.8145	-2.09232	18	12	5.07909e-06
IGFBP7	higher in inner disc region	inner disc region	OAF	21	12	30.3444	29.3322	1.01218	21	12	7.21416e-05
IGHA1	higher in OAF	inner disc region	OAF	21	12	23.4146	28.3714	-4.95675	11	12	1.29342e-05
IL17B	higher in inner disc region	inner disc region	OAF	21	12	31.8804	28.8319	3.04846	21	12	4.34382e-06
INHBA	higher in inner disc region	inner disc region	OAF	21	12	30.2928	25.8521	4.44072	21	8	2.07973e-06
IQGAP1	higher in OAF	inner disc region	OAF	21	12	29.1991	31.1699	-1.97079	21	12	1.29788e-06
ISLR	higher in inner disc region	inner disc region	OAF	21	12	28.5698	26.9213	1.64851	21	11	1.27984e-06
ITIH2	higher in OAF	inner disc region	OAF	21	12	23.7873	27.791	-4.00367	16	11	0.000132219
KAL1	higher in inner disc region	inner disc region	OAF	21	12	28.8522	27.0868	1.76539	21	10	1.57033e-06
KRT19	higher in inner disc region	inner disc region	OAF	21	12	30.1155	25.0957	5.01984	21	11	2.41766e-06
KRT8	higher in inner disc region	inner disc region	OAF	21	12	30.8661	25.1894	5.67675	21	10	2.47875e-07
LAMA4	higher in OAF	inner disc region	OAF	21	12	25.0365	28.8919	-3.85544	14	11	2.37999e-07
LAMB2	higher in OAF	inner disc region	OAF	21	12	23.8104	30.3322	-6.52186	20	12	5.39008e-09
LAMC1	higher in OAF	inner disc region	OAF	21	12	24.0695	30.7649	-6.69541	18	12	3.50867e-10
LMNA	higher in OAF	inner disc region	OAF	21	12	30.7257	32.7988	-2.0731	21	12	2.78107e-08
LOX	higher in OAF	inner disc region	OAF	21	12	29.8474	30.9394	-1.09196	21	12	5.48619e-05
LPL	higher in inner disc region	inner disc region	OAF	21	12	28.2337	26.8579	1.37583	21	8	2.62381e-05
MATN3	higher in inner disc region	inner disc region	OAF	21	12	31.5295	28.9487	2.5808	21	12	6.09144e-05
MFGE8	higher in OAF	inner disc region	OAF	21	12	32.5656	34.3668	-1.80126	21	12	4.09521e-07
MFI2	higher in inner disc region	inner disc region	OAF	21	12	31.6322	30.0244	1.60778	21	12	4.15665e-05
MSN	higher in OAF	inner disc region	OAF	21	12	29.2352	30.27	-1.03484	21	12	2.57023e-05
MXRA5	higher in inner disc region	inner disc region	OAF	21	12	31.4317	29.3607	2.07097	21	12	1.18608e-07
MYH9	higher in OAF	inner disc region	OAF	21	12	25.2091	29.814	-4.60492	21	12	8.72016e-06
NCL	higher in OAF	inner disc region	OAF	21	12	26.6618	28.8055	-2.14374	13	11	3.64437e-06
NUCB1	higher in inner disc region	inner disc region	OAF	21	12	30.1978	29.3333	0.864472	21	11	6.23013e-05
OAF	higher in inner disc region	inner disc region	OAF	21	12	29.7382	28.0785	1.65971	21	12	8.03808e-06
OGN	higher in OAF	inner disc region	OAF	21	12	35.6022	37.3414	-1.73927	21	12	2.32268e-08
ORM1	higher in OAF	inner disc region	OAF	21	12	27.9165	31.5825	-3.666	20	12	5.03555e-06
PCOLCE	higher in inner disc region	inner disc region	OAF	21	12	33.2	32.3688	0.831146	21	12	4.81153e-05
PCOLCE2	higher in inner disc region	inner disc region	OAF	21	12	32.5029	31.8157	0.687115	21	12	2.45582e-05
PDGFRL	higher in inner disc region	inner disc region	OAF	21	12	29.957	28.4611	1.49592	21	12	6.08504e-08
PDIA3	higher in OAF	inner disc region	OAF	21	12	29.4223	30.3426	-0.920317	21	12	3.35163e-06
PDIA6	higher in OAF	inner disc region	OAF	21	12	27.222	28.4113	-1.18924	19	12	1.30421e-05
PFN1	higher in OAF	inner disc region	OAF	21	12	26.437	28.2641	-1.82708	11	11	0.000132282
PKM	higher in OAF	inner disc region	OAF	21	12	32.1328	32.7841	-0.651339	21	12	0.000123787
PLOD1	higher in inner disc region	inner disc region	OAF	21	12	30.4836	29.0628	1.42079	21	12	0.000145894
PLS3	higher in OAF	inner disc region	OAF	21	12	24.8774	28.2743	-3.39695	17	12	9.07737e-09
PPIA	higher in OAF	inner disc region	OAF	21	12	29.6856	30.8086	-1.123	21	12	1.13397e-06
PRDX2	higher in OAF	inner disc region	OAF	21	12	27.5591	29.2469	-1.68788	21	12	4.94122e-07
PRELP	higher in OAF	inner disc region	OAF	21	12	36.7634	38.2313	-1.46787	21	12	3.49716e-08
PXYLP1	higher in inner disc region	inner disc region	OAF	21	12	28.763	26.7522	2.01077	21	10	4.23491e-05
QSOX1	higher in inner disc region	inner disc region	OAF	21	12	32.2672	29.9229	2.34434	21	12	5.181e-05
RNASE4	higher in inner disc region	inner disc region	OAF	21	12	33.2103	32.0784	1.13185	21	12	3.76305e-05
RPS27A	higher in OAF	inner disc region	OAF	21	12	28.0811	29.1375	-1.05643	15	12	0.000163816
RPS3	higher in OAF	inner disc region	OAF	21	12	26.201	27.3905	-1.18954	16	12	0.000146649
RPS8	higher in OAF	inner disc region	OAF	21	12	25.9558	27.5208	-1.56492	15	11	1.27516e-05
SEMA3C	higher in inner disc region	inner disc region	OAF	21	12	29.4758	27.3622	2.11357	21	12	1.51804e-08
SERPINA5	higher in inner disc region	inner disc region	OAF	21	12	34.084	32.1426	1.94137	21	12	1.24207e-07
SERPINC1	higher in OAF	inner disc region	OAF	21	12	23.9197	29.0507	-5.131	12	12	3.69562e-06
SERPINE2	higher in inner disc region	inner disc region	OAF	21	12	32.7588	30.9049	1.85388	21	12	2.22671e-06
SERPINF1	higher in OAF	inner disc region	OAF	21	12	24.9606	31.176	-6.21538	15	11	2.29991e-12
SERPING1	higher in inner disc region	inner disc region	OAF	21	12	32.7266	30.6686	2.05804	21	12	1.53142e-05
SERPINH1	higher in OAF	inner disc region	OAF	21	12	25.4962	28.2342	-2.73802	12	11	6.93261e-06
SLIT3	higher in inner disc region	inner disc region	OAF	21	12	28.002	24.5215	3.48046	21	8	0.000104429
SLPI	higher in inner disc region	inner disc region	OAF	21	12	33.0631	31.2647	1.7984	21	10	8.01959e-05
SMOC1	higher in inner disc region	inner disc region	OAF	21	12	31.0778	29.4502	1.62763	21	12	2.82745e-06
SMOC2	higher in inner disc region	inner disc region	OAF	21	12	30.8074	29.7192	1.08826	21	12	3.0792e-05
SND1	higher in OAF	inner disc region	OAF	21	12	24.6557	26.3637	-1.70801	14	11	2.60909e-06
SOD1	higher in OAF	inner disc region	OAF	21	12	28.5648	29.7669	-1.2021	18	12	3.38535e-06
SRPX2	higher in OAF	inner disc region	OAF	21	12	32.0768	33.2614	-1.18464	21	12	1.13312e-05
TGFBI	higher in OAF	inner disc region	OAF	21	12	33.3788	34.2242	-0.845412	21	12	0.000138304
THBS1	higher in OAF	inner disc region	OAF	21	12	32.4847	36.0901	-3.60541	21	12	3.7219e-08
THBS2	higher in OAF	inner disc region	OAF	21	12	29.6186	31.7827	-2.16406	21	12	5.24476e-06
THBS4	higher in OAF	inner disc region	OAF	21	12	30.2589	32.7603	-2.50134	21	12	5.23624e-09
TIMP1	higher in inner disc region	inner disc region	OAF	21	12	30.965	29.5317	1.43333	21	12	2.68473e-06
TNFRSF11B	higher in inner disc region	inner disc region	OAF	21	12	32.0485	29.454	2.5945	21	12	8.47721e-07
TUBA1B	higher in OAF	inner disc region	OAF	21	12	28.9665	30.0973	-1.13072	21	12	6.55735e-05
UBA1	higher in OAF	inner disc region	OAF	21	12	27.0499	28.6351	-1.58519	16	12	7.84782e-08
VCL	higher in OAF	inner disc region	OAF	21	12	26.4216	29.0343	-2.61272	20	12	5.72104e-06
VCP	higher in OAF	inner disc region	OAF	21	12	25.3368	28.1417	-2.80488	18	12	1.16696e-05
VIT	higher in inner disc region	inner disc region	OAF	21	12	30.7762	28.7466	2.02962	21	12	1.4692e-07
VWA1	higher in OAF	inner disc region	OAF	21	12	27.6247	28.7237	-1.09893	16	12	2.00054e-05
YWHAE	higher in OAF	inner disc region	OAF	21	12	29.0233	30.0817	-1.0584	21	12	4.83628e-08
YWHAQ	higher in OAF	inner disc region	OAF	21	12	26.618	28.3419	-1.72397	20	12	4.26014e-07
YWHAZ	higher in OAF	inner disc region	OAF	21	12	29.0755	30.2447	-1.16919	21	12	1.22499e-11

## Sheet: Sheet4
gene	status	group1	group2	Num of samples in group1	Num of samples in group2	average log2(LFQ) in group1	average log2(LFQ) in group2	log2(Fold change)	Num of valid values in group1	Num of valid values in group2
ADD3	higher in NP and NP/IAF	NP and NP/IAF	IAF and OAF	15	18	27.1455	25.1413	2.00417	3	3
AK2	higher in NP and NP/IAF	NP and NP/IAF	IAF and OAF	15	18	27.2799	25.0594	2.22048	1	6
ATP6V1E1	higher in NP and NP/IAF	NP and NP/IAF	IAF and OAF	15	18	27.847	25.7496	2.0974	2	3
EFHD2	higher in NP and NP/IAF	NP and NP/IAF	IAF and OAF	15	18	27.0221	24.7573	2.2648	1	1
EIF5	higher in NP and NP/IAF	NP and NP/IAF	IAF and OAF	15	18	27.1762	24.8254	2.3508	1	1
EPHX1	higher in NP and NP/IAF	NP and NP/IAF	IAF and OAF	15	18	30.5419	25.3065	5.2354	1	1
GGT2	higher in NP and NP/IAF	NP and NP/IAF	IAF and OAF	15	18	28.9014	26.5801	2.32127	1	3
HYAL1	higher in NP and NP/IAF	NP and NP/IAF	IAF and OAF	15	18	27.4571	24.1437	3.3134	1	1
IGLV6-57	higher in NP and NP/IAF	NP and NP/IAF	IAF and OAF	15	18	29.138	26.9274	2.2106	1	1
INHBA	higher in NP and NP/IAF	NP and NP/IAF	IAF and OAF	15	18	30.4539	27.5826	2.87128	15	14
MOXD1	higher in NP and NP/IAF	NP and NP/IAF	IAF and OAF	15	18	25.6067	23.3271	2.2796	1	2
SLIT3	higher in NP and NP/IAF	NP and NP/IAF	IAF and OAF	15	18	28.1166	25.8903	2.22638	15	14
TXNRD1	higher in NP and NP/IAF	NP and NP/IAF	IAF and OAF	15	18	25.5362	23.2273	2.3089	1	1
VAPA	higher in NP and NP/IAF	NP and NP/IAF	IAF and OAF	15	18	25.7617	23.1997	2.562	1	1
A1BG	higher in IAF and OAF	NP and NP/IAF	IAF and OAF	15	18	22.5965	25.8499	-3.25348	4	12
ADH1B	higher in IAF and OAF	NP and NP/IAF	IAF and OAF	15	18	24.0281	26.3036	-2.27554	5	4
AKR1C3	higher in IAF and OAF	NP and NP/IAF	IAF and OAF	15	18	24.106	26.7536	-2.6476	2	3
ALDH1A1	higher in IAF and OAF	NP and NP/IAF	IAF and OAF	15	18	22.2147	25.4566	-3.24189	1	8
AMBP	higher in IAF and OAF	NP and NP/IAF	IAF and OAF	15	18	25.4403	29.6493	-4.20904	6	16
APOBEC2	higher in IAF and OAF	NP and NP/IAF	IAF and OAF	15	18	23.8204	25.9745	-2.1541	1	7
APOC1	higher in IAF and OAF	NP and NP/IAF	IAF and OAF	15	18	25.8816	28.4902	-2.60855	3	6
APOC3	higher in IAF and OAF	NP and NP/IAF	IAF and OAF	15	18	24.5883	26.8116	-2.22326	2	7
APOL1	higher in IAF and OAF	NP and NP/IAF	IAF and OAF	15	18	26.7351	28.9388	-2.20368	2	4
ATP5B	higher in IAF and OAF	NP and NP/IAF	IAF and OAF	15	18	26.6046	28.8989	-2.29427	15	18
C1QB	higher in IAF and OAF	NP and NP/IAF	IAF and OAF	15	18	25.7001	27.7288	-2.02873	1	4
C4A	higher in IAF and OAF	NP and NP/IAF	IAF and OAF	15	18	27.4091	30.3934	-2.9843	1	1
C8A	higher in IAF and OAF	NP and NP/IAF	IAF and OAF	15	18	21.8046	24.765	-2.96038	7	10
C9	higher in IAF and OAF	NP and NP/IAF	IAF and OAF	15	18	23.5735	26.044	-2.47047	14	14
CA1	higher in IAF and OAF	NP and NP/IAF	IAF and OAF	15	18	26.1512	28.8594	-2.7082	8	14
CA2	higher in IAF and OAF	NP and NP/IAF	IAF and OAF	15	18	24.9131	27.4038	-2.49064	6	12
CALR	higher in IAF and OAF	NP and NP/IAF	IAF and OAF	15	18	26.2562	28.2903	-2.0341	13	18
CAP1	higher in IAF and OAF	NP and NP/IAF	IAF and OAF	15	18	24.5015	26.6505	-2.14899	8	15
CD5L	higher in IAF and OAF	NP and NP/IAF	IAF and OAF	15	18	25.887	28.3085	-2.42145	6	1
CHD9	higher in IAF and OAF	NP and NP/IAF	IAF and OAF	15	18	25.3367	27.5539	-2.21719	1	13
CKMT2	higher in IAF and OAF	NP and NP/IAF	IAF and OAF	15	18	18.3533	23.7339	-5.38063	1	6
CRIP2	higher in IAF and OAF	NP and NP/IAF	IAF and OAF	15	18	24.8049	27.0845	-2.2796	2	8
CTSG	higher in IAF and OAF	NP and NP/IAF	IAF and OAF	15	18	25.4437	27.741	-2.29725	1	2
DPYSL3	higher in IAF and OAF	NP and NP/IAF	IAF and OAF	15	18	24.7469	27.6576	-2.91069	9	15
FGA	higher in IAF and OAF	NP and NP/IAF	IAF and OAF	15	18	25.1256	28.4227	-3.29707	15	18
GC	higher in IAF and OAF	NP and NP/IAF	IAF and OAF	15	18	23.3771	29.2731	-5.89601	6	14
GPLD1	higher in IAF and OAF	NP and NP/IAF	IAF and OAF	15	18	22.9091	25.3143	-2.4052	1	2
HBG1	higher in IAF and OAF	NP and NP/IAF	IAF and OAF	15	18	26.4955	28.5795	-2.084	2	10
HIST2H2AC	higher in IAF and OAF	NP and NP/IAF	IAF and OAF	15	18	27.8335	30.2379	-2.40436	13	17
HNRNPA1	higher in IAF and OAF	NP and NP/IAF	IAF and OAF	15	18	24.7762	26.8114	-2.03523	2	12
HNRNPA3	higher in IAF and OAF	NP and NP/IAF	IAF and OAF	15	18	24.9935	27.0136	-2.02005	4	13
HNRNPC	higher in IAF and OAF	NP and NP/IAF	IAF and OAF	15	18	24.3647	26.7926	-2.42792	1	12
HNRNPL	higher in IAF and OAF	NP and NP/IAF	IAF and OAF	15	18	22.4024	24.9292	-2.52683	1	7
HRG	higher in IAF and OAF	NP and NP/IAF	IAF and OAF	15	18	23.0615	26.933	-3.87151	7	13
HRNR	higher in IAF and OAF	NP and NP/IAF	IAF and OAF	15	18	25.8995	29.6066	-3.70707	2	3
HSPD1	higher in IAF and OAF	NP and NP/IAF	IAF and OAF	15	18	23.8331	25.9825	-2.14948	2	7
IDH2	higher in IAF and OAF	NP and NP/IAF	IAF and OAF	15	18	22.5788	25.0826	-2.50382	5	11
IGHG2	higher in IAF and OAF	NP and NP/IAF	IAF and OAF	15	18	26.1955	28.4382	-2.24271	8	15
IGHV5-51	higher in IAF and OAF	NP and NP/IAF	IAF and OAF	15	18	26.1437	28.3971	-2.2534	1	1
KNG1	higher in IAF and OAF	NP and NP/IAF	IAF and OAF	15	18	26.0464	28.2797	-2.23339	2	11
LAMA2	higher in IAF and OAF	NP and NP/IAF	IAF and OAF	15	18	24.4047	27.0716	-2.66698	4	12
LAMA4	higher in IAF and OAF	NP and NP/IAF	IAF and OAF	15	18	25.2173	27.9237	-2.70637	11	14
LAMB1	higher in IAF and OAF	NP and NP/IAF	IAF and OAF	15	18	24.6092	27.0977	-2.48851	6	15
LRG1	higher in IAF and OAF	NP and NP/IAF	IAF and OAF	15	18	23.976	26.1183	-2.14231	2	8
MAMDC2	higher in IAF and OAF	NP and NP/IAF	IAF and OAF	15	18	25.08	27.4679	-2.3879	6	13
MYH11	higher in IAF and OAF	NP and NP/IAF	IAF and OAF	15	18	23.5843	25.882	-2.29775	14	18
MYH9	higher in IAF and OAF	NP and NP/IAF	IAF and OAF	15	18	25.4221	28.1015	-2.67936	15	18
MYL12A	higher in IAF and OAF	NP and NP/IAF	IAF and OAF	15	18	24.6236	26.914	-2.2904	1	11
MYOC	higher in IAF and OAF	NP and NP/IAF	IAF and OAF	15	18	24.2636	27.5342	-3.27054	5	10
ORM1	higher in IAF and OAF	NP and NP/IAF	IAF and OAF	15	18	27.6647	30.5564	-2.89167	14	18
ORM2	higher in IAF and OAF	NP and NP/IAF	IAF and OAF	15	18	26.4333	29.2452	-2.81183	4	11
PLG	higher in IAF and OAF	NP and NP/IAF	IAF and OAF	15	18	23.7267	25.8572	-2.13052	13	14
PLIN4	higher in IAF and OAF	NP and NP/IAF	IAF and OAF	15	18	23.6095	26.7185	-3.109	1	2
PRPH	higher in IAF and OAF	NP and NP/IAF	IAF and OAF	15	18	24.0069	26.2869	-2.28007	2	6
RPL11	higher in IAF and OAF	NP and NP/IAF	IAF and OAF	15	18	22.759	25.8471	-3.08812	1	4
RPL18	higher in IAF and OAF	NP and NP/IAF	IAF and OAF	15	18	24.0798	26.4115	-2.3317	1	9
RPS2	higher in IAF and OAF	NP and NP/IAF	IAF and OAF	15	18	19.9458	25.1837	-5.23795	1	8
S100A9	higher in IAF and OAF	NP and NP/IAF	IAF and OAF	15	18	23.4893	26.4583	-2.96898	3	12
SAA4	higher in IAF and OAF	NP and NP/IAF	IAF and OAF	15	18	23.8072	26.2961	-2.4889	1	2
SDHA	higher in IAF and OAF	NP and NP/IAF	IAF and OAF	15	18	21.6972	24.4046	-2.7074	1	1
SERPINA4	higher in IAF and OAF	NP and NP/IAF	IAF and OAF	15	18	22.8172	25.335	-2.5178	1	11
SERPINC1	higher in IAF and OAF	NP and NP/IAF	IAF and OAF	15	18	24.0265	27.9604	-3.93392	9	15
SOD2	higher in IAF and OAF	NP and NP/IAF	IAF and OAF	15	18	26.1218	28.1938	-2.07202	11	16
SPTAN1	higher in IAF and OAF	NP and NP/IAF	IAF and OAF	15	18	25.1906	27.2236	-2.03308	14	18
TAGLN2	higher in IAF and OAF	NP and NP/IAF	IAF and OAF	15	18	25.3998	27.5475	-2.14769	2	16
TPM4	higher in IAF and OAF	NP and NP/IAF	IAF and OAF	15	18	25.5109	27.5761	-2.06521	2	11
TTR	higher in IAF and OAF	NP and NP/IAF	IAF and OAF	15	18	24.9815	28.4366	-3.4551	6	14
TUFM	higher in IAF and OAF	NP and NP/IAF	IAF and OAF	15	18	23.2002	25.6727	-2.47248	1	6
VTN	higher in IAF and OAF	NP and NP/IAF	IAF and OAF	15	18	23.5766	28.5004	-4.92386	6	16

## Sheet: Sheet5
gene	status	group1	group2	Num of samples in group1	Num of samples in group2	Num of valid values in group1	Num of valid values in group2
AHSG	exclusive in IAF and OAF	NP and NP/IAF	IAF and OAF	15	18	0	14
BLVRB	exclusive in IAF and OAF	NP and NP/IAF	IAF and OAF	15	18	0	13
COL4A2	exclusive in IAF and OAF	NP and NP/IAF	IAF and OAF	15	18	0	13
H2AFV	exclusive in IAF and OAF	NP and NP/IAF	IAF and OAF	15	18	0	12
MECP2	exclusive in IAF and OAF	NP and NP/IAF	IAF and OAF	15	18	0	10
MFAP4	exclusive in IAF and OAF	NP and NP/IAF	IAF and OAF	15	18	0	12
OLFML1	exclusive in IAF and OAF	NP and NP/IAF	IAF and OAF	15	18	0	10
OLFML3	exclusive in IAF and OAF	NP and NP/IAF	IAF and OAF	15	18	0	10
PDCD6	exclusive in IAF and OAF	NP and NP/IAF	IAF and OAF	15	18	0	13
PLIN3	exclusive in IAF and OAF	NP and NP/IAF	IAF and OAF	15	18	0	10

## Sheet: Sheet6
gene	status	group1	group2	Num of samples in group1	Num of samples in group2	average log2(LFQ) in group1	average log2(LFQ) in group2	log2(Fold change)	Num of valid values in group1	Num of valid values in group2	p-value
AHNAK	higher in IAF and OAF	NP and NP/IAF	IAF and OAF	15	18	28.8933	31.2602	-2.36692	15	18	3.89583e-05
ANXA1	higher in IAF and OAF	NP and NP/IAF	IAF and OAF	15	18	32.3249	33.2356	-0.910698	15	18	3.7498e-07
ANXA2	higher in IAF and OAF	NP and NP/IAF	IAF and OAF	15	18	33.1879	33.8278	-0.639958	15	18	8.47008e-05
ANXA4	higher in IAF and OAF	NP and NP/IAF	IAF and OAF	15	18	30.8408	32.0063	-1.16543	15	18	8.10115e-08
ANXA5	higher in IAF and OAF	NP and NP/IAF	IAF and OAF	15	18	31.7309	32.7597	-1.02877	15	18	4.10776e-06
ANXA6	higher in IAF and OAF	NP and NP/IAF	IAF and OAF	15	18	28.8636	30.4933	-1.62971	15	18	1.42356e-08
AOC2	higher in IAF and OAF	NP and NP/IAF	IAF and OAF	15	18	24.9949	27.8969	-2.90204	11	16	2.36765e-06
APOA1	higher in IAF and OAF	NP and NP/IAF	IAF and OAF	15	18	26.8948	30.2406	-3.34577	15	18	7.55347e-05
APOD	higher in NP and NP/IAF	NP and NP/IAF	IAF and OAF	15	18	34.2881	31.7673	2.52074	15	18	1.22505e-06
ASPN	higher in IAF and OAF	NP and NP/IAF	IAF and OAF	15	18	31.4674	32.6563	-1.1889	15	18	2.45746e-05
BGN	higher in IAF and OAF	NP and NP/IAF	IAF and OAF	15	18	36.9631	38.4382	-1.47516	15	18	1.82482e-09
C1S	higher in NP and NP/IAF	NP and NP/IAF	IAF and OAF	15	18	32.1368	30.7092	1.42754	15	18	5.40018e-06
CD109	higher in NP and NP/IAF	NP and NP/IAF	IAF and OAF	15	18	32.8137	31.2955	1.5182	15	18	7.08751e-08
CFB	higher in NP and NP/IAF	NP and NP/IAF	IAF and OAF	15	18	32.115	31.226	0.888999	15	18	4.92005e-06
CILP	higher in IAF and OAF	NP and NP/IAF	IAF and OAF	15	18	36.1584	36.9113	-0.75286	15	18	1.55998e-08
CILP2	higher in IAF and OAF	NP and NP/IAF	IAF and OAF	15	18	35.5571	36.369	-0.811966	15	18	4.08701e-09
CLEC3B	higher in NP and NP/IAF	NP and NP/IAF	IAF and OAF	15	18	31.5121	30.318	1.19415	15	18	3.1746e-07
CLSTN1	higher in NP and NP/IAF	NP and NP/IAF	IAF and OAF	15	18	29.4088	27.6701	1.7387	15	17	3.36388e-06
COL11A1	higher in NP and NP/IAF	NP and NP/IAF	IAF and OAF	15	18	33.1986	32.0274	1.17113	15	18	1.40365e-06
COL11A2	higher in NP and NP/IAF	NP and NP/IAF	IAF and OAF	15	18	35.9318	34.9787	0.95303	15	18	9.33048e-05
COL1A1	higher in IAF and OAF	NP and NP/IAF	IAF and OAF	15	18	31.8053	34.8303	-3.025	15	18	2.2905e-06
COL5A1	higher in NP and NP/IAF	NP and NP/IAF	IAF and OAF	15	18	31.7905	30.2485	1.54207	15	18	2.00492e-06
COL5A2	higher in NP and NP/IAF	NP and NP/IAF	IAF and OAF	15	18	31.5135	30.1428	1.37062	15	18	5.81289e-06
COL6A1	higher in IAF and OAF	NP and NP/IAF	IAF and OAF	15	18	35.8039	37.5142	-1.71029	15	18	2.05555e-07
COL6A2	higher in IAF and OAF	NP and NP/IAF	IAF and OAF	15	18	35.2085	36.7275	-1.51899	15	18	1.06857e-09
COL6A3	higher in IAF and OAF	NP and NP/IAF	IAF and OAF	15	18	37.2665	38.5994	-1.33296	15	18	2.12526e-07
COMP	higher in IAF and OAF	NP and NP/IAF	IAF and OAF	15	18	38.3601	39.458	-1.09791	15	18	7.06246e-08
CP	higher in NP and NP/IAF	NP and NP/IAF	IAF and OAF	15	18	33.8364	32.2252	1.61121	15	18	1.25463e-05
CSPG4	higher in NP and NP/IAF	NP and NP/IAF	IAF and OAF	15	18	32.352	30.4308	1.92115	15	18	7.62923e-08
CST3	higher in NP and NP/IAF	NP and NP/IAF	IAF and OAF	15	18	29.9162	29.018	0.898259	15	18	8.82393e-05
CXCL12	higher in NP and NP/IAF	NP and NP/IAF	IAF and OAF	15	18	30.0345	28.3206	1.71392	15	17	1.19291e-05
DCN	higher in IAF and OAF	NP and NP/IAF	IAF and OAF	15	18	36.2084	37.2946	-1.08618	15	18	2.77855e-06
EDIL3	higher in NP and NP/IAF	NP and NP/IAF	IAF and OAF	15	18	31.9063	30.6282	1.27809	15	18	5.42441e-06
EFEMP1	higher in NP and NP/IAF	NP and NP/IAF	IAF and OAF	15	18	29.2637	27.5655	1.69823	15	17	6.39581e-05
EMILIN1	higher in NP and NP/IAF	NP and NP/IAF	IAF and OAF	15	18	31.2534	30.3407	0.912621	15	18	9.50465e-06
FGB	higher in IAF and OAF	NP and NP/IAF	IAF and OAF	15	18	25.5902	29.257	-3.66684	15	18	2.76874e-05
FGG	higher in IAF and OAF	NP and NP/IAF	IAF and OAF	15	18	25.4313	29.2532	-3.82189	14	18	0.00010713
FMOD	higher in IAF and OAF	NP and NP/IAF	IAF and OAF	15	18	36.0733	37.353	-1.27968	15	18	3.16504e-07
FN1	higher in NP and NP/IAF	NP and NP/IAF	IAF and OAF	15	18	38.8929	37.7824	1.11052	15	18	0.000125126
FRZB	higher in NP and NP/IAF	NP and NP/IAF	IAF and OAF	15	18	31.3254	29.6881	1.63729	15	18	2.09166e-06
GAPDH	higher in IAF and OAF	NP and NP/IAF	IAF and OAF	15	18	32.0051	32.823	-0.817838	15	18	8.28066e-06
GNAI2	higher in IAF and OAF	NP and NP/IAF	IAF and OAF	15	18	26.3424	28.0281	-1.68573	12	17	1.40537e-07
GSTP1	higher in IAF and OAF	NP and NP/IAF	IAF and OAF	15	18	27.7883	29.518	-1.7297	14	18	2.51686e-07
HBA1	higher in IAF and OAF	NP and NP/IAF	IAF and OAF	15	18	31.6917	33.6066	-1.9149	15	18	3.45716e-05
HIST1H2BL	higher in IAF and OAF	NP and NP/IAF	IAF and OAF	15	18	29.5987	31.314	-1.71525	15	18	1.8984e-05
HIST1H4A	higher in IAF and OAF	NP and NP/IAF	IAF and OAF	15	18	30.4523	31.8542	-1.40192	15	18	6.8522e-06
HNRNPA2B1	higher in IAF and OAF	NP and NP/IAF	IAF and OAF	15	18	26.651	28.1496	-1.4986	11	16	4.99564e-05
HNRNPK	higher in IAF and OAF	NP and NP/IAF	IAF and OAF	15	18	26.3706	27.7347	-1.36413	12	17	0.000128898
HPX	higher in IAF and OAF	NP and NP/IAF	IAF and OAF	15	18	24.6634	28.6962	-4.03273	11	17	0.000122887
HSP90AA1	higher in IAF and OAF	NP and NP/IAF	IAF and OAF	15	18	28.7963	29.7719	-0.975607	15	18	9.27266e-05
IGHA1	higher in IAF and OAF	NP and NP/IAF	IAF and OAF	15	18	23.2164	28.1426	-4.92622	10	13	3.08108e-05
IL17B	higher in NP and NP/IAF	NP and NP/IAF	IAF and OAF	15	18	32.0805	29.6812	2.39931	15	18	1.17841e-05
ISLR	higher in NP and NP/IAF	NP and NP/IAF	IAF and OAF	15	18	28.6884	27.3985	1.28989	15	17	5.56459e-05
ITIH1	higher in IAF and OAF	NP and NP/IAF	IAF and OAF	15	18	22.3581	28.2288	-5.87064	8	14	1.59388e-06
ITIH2	higher in IAF and OAF	NP and NP/IAF	IAF and OAF	15	18	23.2237	26.9273	-3.70362	11	16	7.32098e-05
ITIH5	higher in NP and NP/IAF	NP and NP/IAF	IAF and OAF	15	18	31.4178	30.3198	1.09798	15	18	5.00992e-05
KAL1	higher in NP and NP/IAF	NP and NP/IAF	IAF and OAF	15	18	29.0469	27.5664	1.48047	15	16	8.5445e-06
KRT19	higher in NP and NP/IAF	NP and NP/IAF	IAF and OAF	15	18	31.2354	25.8792	5.35628	15	17	1.17603e-07
KRT8	higher in NP and NP/IAF	NP and NP/IAF	IAF and OAF	15	18	31.663	26.5711	5.09185	15	16	1.67181e-06
LAMB2	higher in IAF and OAF	NP and NP/IAF	IAF and OAF	15	18	23.6547	28.5514	-4.89667	15	17	1.03235e-05
LAMC1	higher in IAF and OAF	NP and NP/IAF	IAF and OAF	15	18	24.0801	29.0819	-5.00179	14	16	2.61391e-05
LMNA	higher in IAF and OAF	NP and NP/IAF	IAF and OAF	15	18	30.6334	32.1847	-1.55127	15	18	1.00115e-05
LUM	higher in IAF and OAF	NP and NP/IAF	IAF and OAF	15	18	36.9228	37.6809	-0.758054	15	18	1.11176e-05
MATN2	higher in IAF and OAF	NP and NP/IAF	IAF and OAF	15	18	31.1977	32.0625	-0.864716	15	18	6.59783e-05
MATN3	higher in NP and NP/IAF	NP and NP/IAF	IAF and OAF	15	18	31.6655	29.6957	1.96984	15	18	0.000125067
MFI2	higher in NP and NP/IAF	NP and NP/IAF	IAF and OAF	15	18	31.7496	30.4625	1.28716	15	18	2.72807e-05
MMP3	higher in IAF and OAF	NP and NP/IAF	IAF and OAF	15	18	28.3997	29.478	-1.07828	15	17	8.34302e-05
MSN	higher in IAF and OAF	NP and NP/IAF	IAF and OAF	15	18	29.0233	30.1016	-1.07824	15	18	1.05392e-06
NID1	higher in IAF and OAF	NP and NP/IAF	IAF and OAF	15	18	24.7643	28.5205	-3.7562	8	14	1.99462e-06
OGN	higher in IAF and OAF	NP and NP/IAF	IAF and OAF	15	18	35.264	37.0435	-1.77949	15	18	6.34439e-09
PCOLCE2	higher in NP and NP/IAF	NP and NP/IAF	IAF and OAF	15	18	32.6046	31.96	0.644581	15	18	7.61605e-05
PKM	higher in IAF and OAF	NP and NP/IAF	IAF and OAF	15	18	32.0348	32.6486	-0.613891	15	18	2.86177e-05
PPIA	higher in IAF and OAF	NP and NP/IAF	IAF and OAF	15	18	29.4903	30.597	-1.10667	15	18	9.36187e-08
PRDX2	higher in IAF and OAF	NP and NP/IAF	IAF and OAF	15	18	27.4163	28.8033	-1.38697	15	18	8.78287e-05
PRELP	higher in IAF and OAF	NP and NP/IAF	IAF and OAF	15	18	36.493	37.9673	-1.47431	15	18	1.93008e-09
PYGL	higher in NP and NP/IAF	NP and NP/IAF	IAF and OAF	15	18	27.4945	26.5898	0.904784	15	16	4.2746e-05
QSOX1	higher in NP and NP/IAF	NP and NP/IAF	IAF and OAF	15	18	32.3482	30.6368	1.71136	15	18	0.000132836
RCN3	higher in IAF and OAF	NP and NP/IAF	IAF and OAF	15	18	29.8613	30.7261	-0.864859	15	18	3.26234e-07
RPS8	higher in IAF and OAF	NP and NP/IAF	IAF and OAF	15	18	25.7697	27.2399	-1.47016	11	15	5.36265e-05
S100A4	higher in IAF and OAF	NP and NP/IAF	IAF and OAF	15	18	28.1887	29.7392	-1.55043	15	18	3.65378e-07
SEMA3C	higher in NP and NP/IAF	NP and NP/IAF	IAF and OAF	15	18	29.85	27.7549	2.09513	15	18	4.99207e-08
SERPINA5	higher in NP and NP/IAF	NP and NP/IAF	IAF and OAF	15	18	34.1673	32.7203	1.44697	15	18	9.41419e-06
SERPINE2	higher in NP and NP/IAF	NP and NP/IAF	IAF and OAF	15	18	32.8819	31.4202	1.46168	15	18	8.56672e-06
SERPINF1	higher in IAF and OAF	NP and NP/IAF	IAF and OAF	15	18	24.8028	29.6342	-4.8314	11	15	1.21807e-05
SERPING1	higher in NP and NP/IAF	NP and NP/IAF	IAF and OAF	15	18	32.9209	31.1927	1.72812	15	18	8.15469e-06
SMOC2	higher in NP and NP/IAF	NP and NP/IAF	IAF and OAF	15	18	30.9203	29.9879	0.932374	15	18	5.25397e-05
SOD1	higher in IAF and OAF	NP and NP/IAF	IAF and OAF	15	18	28.447	29.5035	-1.05647	13	17	5.79624e-05
SPARC	higher in IAF and OAF	NP and NP/IAF	IAF and OAF	15	18	30.0134	31.1637	-1.15036	15	18	1.06139e-06
SRPX2	higher in IAF and OAF	NP and NP/IAF	IAF and OAF	15	18	31.8409	33.0631	-1.22225	15	18	9.10232e-08
THBS1	higher in IAF and OAF	NP and NP/IAF	IAF and OAF	15	18	32.3964	34.9618	-2.5654	15	18	1.92158e-05
THBS4	higher in IAF and OAF	NP and NP/IAF	IAF and OAF	15	18	29.9805	32.1586	-2.17806	15	18	7.80471e-08
TNFRSF11B	higher in NP and NP/IAF	NP and NP/IAF	IAF and OAF	15	18	32.2127	30.1821	2.03061	15	18	9.61441e-06
VCP	higher in IAF and OAF	NP and NP/IAF	IAF and OAF	15	18	25.0786	27.5141	-2.43555	13	17	3.02041e-05
VIT	higher in NP and NP/IAF	NP and NP/IAF	IAF and OAF	15	18	30.8343	29.3747	1.45959	15	18	6.04142e-05
YWHAZ	higher in IAF and OAF	NP and NP/IAF	IAF and OAF	15	18	28.994	29.9228	-0.928854	15	18	2.73736e-06

## Sheet: Sheet7
gene	status	group1	group2	Num of samples in group1	Num of samples in group2	average log2(LFQ) in group1	average log2(LFQ) in group2	log2(Fold change)	Num of valid values in group1	Num of valid values in group2
A1BG	higher in NP, NP/IAF and OAF	NP, NP/IAF and OAF	IAF	27	6	25.3702	22.7012	2.66899	14	2
AKR1B1	higher in NP, NP/IAF and OAF	NP, NP/IAF and OAF	IAF	27	6	25.8175	22.9081	2.90944	7	1
AMBP	higher in NP, NP/IAF and OAF	NP, NP/IAF and OAF	IAF	27	6	29.1891	25.4069	3.78217	18	4
BLVRB	higher in NP, NP/IAF and OAF	NP, NP/IAF and OAF	IAF	27	6	27.3525	24.8051	2.54738	10	3
C8G	higher in NP, NP/IAF and OAF	NP, NP/IAF and OAF	IAF	27	6	26.044	23.8248	2.21913	13	3
C9	higher in NP, NP/IAF and OAF	NP, NP/IAF and OAF	IAF	27	6	25.0761	22.5802	2.49598	25	3
CDSN	higher in NP, NP/IAF and OAF	NP, NP/IAF and OAF	IAF	27	6	28.3512	25.0984	3.2528	1	1
CFL2	higher in NP, NP/IAF and OAF	NP, NP/IAF and OAF	IAF	27	6	26.0187	23.5501	2.46858	9	2
CHD9	higher in NP, NP/IAF and OAF	NP, NP/IAF and OAF	IAF	27	6	27.6909	25.623	2.06794	12	2
CMPK1	higher in NP, NP/IAF and OAF	NP, NP/IAF and OAF	IAF	27	6	27.5813	24.9834	2.59793	4	1
COL4A2	higher in NP, NP/IAF and OAF	NP, NP/IAF and OAF	IAF	27	6	27.9649	23.9986	3.96638	11	2
CRP	higher in NP, NP/IAF and OAF	NP, NP/IAF and OAF	IAF	27	6	28.8529	24.4352	4.41765	2	1
DDAH2	higher in NP, NP/IAF and OAF	NP, NP/IAF and OAF	IAF	27	6	26.3161	24.0256	2.29049	7	1
EFHD2	higher in NP, NP/IAF and OAF	NP, NP/IAF and OAF	IAF	27	6	27.0221	24.7573	2.2648	1	1
F11	higher in NP, NP/IAF and OAF	NP, NP/IAF and OAF	IAF	27	6	27.4918	24.5935	2.8983	1	1
F2	higher in NP, NP/IAF and OAF	NP, NP/IAF and OAF	IAF	27	6	24.9842	22.6755	2.30865	25	5
FBLN1	higher in NP, NP/IAF and OAF	NP, NP/IAF and OAF	IAF	27	6	29.6265	27.6028	2.02371	27	6
H1FX	higher in NP, NP/IAF and OAF	NP, NP/IAF and OAF	IAF	27	6	26.2229	24.0616	2.16133	14	1
HMGB1	higher in NP, NP/IAF and OAF	NP, NP/IAF and OAF	IAF	27	6	27.2011	25.113	2.08815	11	1
HPX	higher in NP, NP/IAF and OAF	NP, NP/IAF and OAF	IAF	27	6	27.5161	25.2522	2.26394	23	5
IGFBP6	higher in NP, NP/IAF and OAF	NP, NP/IAF and OAF	IAF	27	6	26.9539	23.2088	3.74507	8	1
IGHG3	higher in NP, NP/IAF and OAF	NP, NP/IAF and OAF	IAF	27	6	27.2363	24.1094	3.1269	12	2
IGHM	higher in NP, NP/IAF and OAF	NP, NP/IAF and OAF	IAF	27	6	24.6833	22.3495	2.33386	14	2
IGKV4-1	higher in NP, NP/IAF and OAF	NP, NP/IAF and OAF	IAF	27	6	29.5359	26.0807	3.4552	1	1
ITIH1	higher in NP, NP/IAF and OAF	NP, NP/IAF and OAF	IAF	27	6	26.3176	23.8579	2.45971	20	2
LAMA4	higher in NP, NP/IAF and OAF	NP, NP/IAF and OAF	IAF	27	6	27.0546	24.3734	2.68116	22	3
LAMB1	higher in NP, NP/IAF and OAF	NP, NP/IAF and OAF	IAF	27	6	26.7451	24.2367	2.50838	18	3
LAMB2	higher in NP, NP/IAF and OAF	NP, NP/IAF and OAF	IAF	27	6	26.6225	24.2774	2.34516	27	5
LAMC1	higher in NP, NP/IAF and OAF	NP, NP/IAF and OAF	IAF	27	6	27.1654	24.0327	3.13276	26	4
MOXD1	higher in NP, NP/IAF and OAF	NP, NP/IAF and OAF	IAF	27	6	25.6067	23.3271	2.2796	1	2
MYH9	higher in NP, NP/IAF and OAF	NP, NP/IAF and OAF	IAF	27	6	27.3741	24.6764	2.69761	27	6
MYL12A	higher in NP, NP/IAF and OAF	NP, NP/IAF and OAF	IAF	27	6	26.9965	23.7158	3.28073	11	1
MYL3	higher in NP, NP/IAF and OAF	NP, NP/IAF and OAF	IAF	27	6	28.7217	26.3817	2.34006	15	5
MYOC	higher in NP, NP/IAF and OAF	NP, NP/IAF and OAF	IAF	27	6	26.6888	23.0162	3.67264	14	1
PLG	higher in NP, NP/IAF and OAF	NP, NP/IAF and OAF	IAF	27	6	25.0218	22.4505	2.57134	25	2
PLS3	higher in NP, NP/IAF and OAF	NP, NP/IAF and OAF	IAF	27	6	26.7074	24.2458	2.46159	24	5
PON1	higher in NP, NP/IAF and OAF	NP, NP/IAF and OAF	IAF	27	6	23.6556	19.0033	4.65231	12	1
PVR	higher in NP, NP/IAF and OAF	NP, NP/IAF and OAF	IAF	27	6	28.3101	24.8378	3.47233	4	1
SERPINA7	higher in NP, NP/IAF and OAF	NP, NP/IAF and OAF	IAF	27	6	28.0741	24.8669	3.2072	1	1
SERPINC1	higher in NP, NP/IAF and OAF	NP, NP/IAF and OAF	IAF	27	6	26.8975	23.5993	3.29817	21	3
SERPIND1	higher in NP, NP/IAF and OAF	NP, NP/IAF and OAF	IAF	27	6	24.5351	22.1284	2.40674	15	2
SERPINF1	higher in NP, NP/IAF and OAF	NP, NP/IAF and OAF	IAF	27	6	27.9894	25.3944	2.59496	22	4
SERPINH1	higher in NP, NP/IAF and OAF	NP, NP/IAF and OAF	IAF	27	6	27.2873	25.0718	2.21544	18	5
STIP1	higher in NP, NP/IAF and OAF	NP, NP/IAF and OAF	IAF	27	6	25.0027	22.9417	2.06095	8	2
TXNRD1	higher in NP, NP/IAF and OAF	NP, NP/IAF and OAF	IAF	27	6	25.5362	23.2273	2.3089	1	1
VTN	higher in NP, NP/IAF and OAF	NP, NP/IAF and OAF	IAF	27	6	27.8468	24.056	3.7908	18	4
CCL21	higher in IAF	NP, NP/IAF and OAF	IAF	27	6	25.2726	27.3075	-2.03486	23	4
CYFIP1	higher in IAF	NP, NP/IAF and OAF	IAF	27	6	23.8036	26.1985	-2.3949	1	1
DSP	higher in IAF	NP, NP/IAF and OAF	IAF	27	6	29.9878	32.1436	-2.1558	2	1
HRNR	higher in IAF	NP, NP/IAF and OAF	IAF	27	6	27.445	30.8388	-3.39383	4	1
LCP1	higher in IAF	NP, NP/IAF and OAF	IAF	27	6	26.5177	28.7264	-2.20867	8	2
MECP2	higher in IAF	NP, NP/IAF and OAF	IAF	27	6	25.6584	28.8251	-3.16671	9	1
PHB2	higher in IAF	NP, NP/IAF and OAF	IAF	27	6	24.7584	26.8573	-2.0989	4	1
SAA4	higher in IAF	NP, NP/IAF and OAF	IAF	27	6	24.7703	26.8588	-2.0885	2	1
TPR	higher in IAF	NP, NP/IAF and OAF	IAF	27	6	24.3764	26.5691	-2.1927	1	1

## Sheet: Sheet8
gene	status	group1	group2	Num of samples in group1	Num of samples in group2	Num of valid values in group1	Num of valid values in group2
DDOST	exclusive in NP, NP/IAF and OAF	NP, NP/IAF and OAF	IAF	27	6	14	0
HSPA9	exclusive in NP, NP/IAF and OAF	NP, NP/IAF and OAF	IAF	27	6	16	0
ORM2	exclusive in NP, NP/IAF and OAF	NP, NP/IAF and OAF	IAF	27	6	15	0
RPLP0	exclusive in NP, NP/IAF and OAF	NP, NP/IAF and OAF	IAF	27	6	14	0
SYNM	exclusive in NP, NP/IAF and OAF	NP, NP/IAF and OAF	IAF	27	6	15	0

## Sheet: Sheet9
gene	status	group1	group2	Num of samples in group1	Num of samples in group2	average log2(LFQ) in group1	average log2(LFQ) in group2	log2(Fold change)	Num of valid values in group1	Num of valid values in group2
A1BG	higher in L5/S1	L5/S1	L4/5	11	11	26.9237	23.8157	3.10798	4	5
AKR1C3	higher in L5/S1	L5/S1	L4/5	11	11	26.9961	24.8269	2.16915	2	3
BASP1	higher in L5/S1	L5/S1	L4/5	11	11	26.6084	24.5591	2.04933	3	1
BLVRB	higher in L5/S1	L5/S1	L4/5	11	11	28.3306	25.737	2.5937	4	4
C1RL	higher in L5/S1	L5/S1	L4/5	11	11	28.0213	24.8946	3.1267	1	2
CAPZB	higher in L5/S1	L5/S1	L4/5	11	11	26.9557	24.4276	2.52818	4	3
CAT	higher in L5/S1	L5/S1	L4/5	11	11	27.1407	24.7564	2.3843	7	7
CFHR1	higher in L5/S1	L5/S1	L4/5	11	11	26.3694	24.2353	2.1341	1	2
CTSG	higher in L5/S1	L5/S1	L4/5	11	11	27.741	25.4437	2.29725	2	1
FABP5	higher in L5/S1	L5/S1	L4/5	11	11	27.3646	24.6069	2.7577	3	2
GC	higher in L5/S1	L5/S1	L4/5	11	11	28.589	26.4879	2.10109	6	9
HBG1	higher in L5/S1	L5/S1	L4/5	11	11	30.0503	28.0225	2.02776	3	5
HMGB1	higher in L5/S1	L5/S1	L4/5	11	11	27.8584	25.6614	2.197	5	1
HNRNPL	higher in L5/S1	L5/S1	L4/5	11	11	25.175	22.4024	2.77263	4	1
HUWE1	higher in L5/S1	L5/S1	L4/5	11	11	29.7342	22.9029	6.8313	2	1
KRT9	higher in L5/S1	L5/S1	L4/5	11	11	28.9775	26.2654	2.71216	11	10
LRG1	higher in L5/S1	L5/S1	L4/5	11	11	27.2727	23.0917	4.18093	3	3
LTF	higher in L5/S1	L5/S1	L4/5	11	11	27.1657	25.0885	2.0772	3	1
MPO	higher in L5/S1	L5/S1	L4/5	11	11	27.2135	24.1775	3.03595	4	1
NES	higher in L5/S1	L5/S1	L4/5	11	11	30.643	28.1355	2.50757	6	8
ORM2	higher in L5/S1	L5/S1	L4/5	11	11	29.6135	27.4997	2.11371	4	5
PAPOLA	higher in L5/S1	L5/S1	L4/5	11	11	31.1245	27.98	3.14451	5	3
PSMA2	higher in L5/S1	L5/S1	L4/5	11	11	27.5146	24.9986	2.516	2	1
RPS2	higher in L5/S1	L5/S1	L4/5	11	11	25.801	23.0558	2.74517	3	3
SERPINA10	higher in L5/S1	L5/S1	L4/5	11	11	25.5716	23.0779	2.4937	1	2
SERPINC1	higher in L5/S1	L5/S1	L4/5	11	11	28.9547	25.4277	3.52707	5	9
SLC4A1	higher in L5/S1	L5/S1	L4/5	11	11	27.1207	24.7589	2.36177	3	2
TTR	higher in L5/S1	L5/S1	L4/5	11	11	29.6553	26.9573	2.69801	4	7
ADD3	higher in L4/5	L5/S1	L4/5	11	11	25.4193	27.5671	-2.14785	2	2
APOL1	higher in L4/5	L5/S1	L4/5	11	11	25.3102	28.6277	-3.31747	1	4
ATP6V1E1	higher in L4/5	L5/S1	L4/5	11	11	24.9603	27.6741	-2.71377	2	3
CASQ1	higher in L4/5	L5/S1	L4/5	11	11	24.7473	26.7549	-2.0076	2	6
CMPK1	higher in L4/5	L5/S1	L4/5	11	11	26.2761	30.9708	-4.6947	1	1
COPA	higher in L4/5	L5/S1	L4/5	11	11	27.2733	29.858	-2.58475	4	1
DCTN1	higher in L4/5	L5/S1	L4/5	11	11	23.0968	25.2074	-2.11055	1	2
DPYD	higher in L4/5	L5/S1	L4/5	11	11	25.8222	27.891	-2.06877	3	1
EEA1	higher in L4/5	L5/S1	L4/5	11	11	25.1216	29.2711	-4.14947	2	7
EIF5	higher in L4/5	L5/S1	L4/5	11	11	24.8254	27.1762	-2.3508	1	1
ITIH3	higher in L4/5	L5/S1	L4/5	11	11	23.4647	25.8761	-2.41147	3	5
KLKB1	higher in L4/5	L5/S1	L4/5	11	11	23.8797	26.0756	-2.19593	3	6
LDB3	higher in L4/5	L5/S1	L4/5	11	11	23.3359	25.6567	-2.32087	3	5
MYBPC1	higher in L4/5	L5/S1	L4/5	11	11	22.8518	25.4901	-2.63827	7	8
MYH1	higher in L4/5	L5/S1	L4/5	11	11	25.8843	29.691	-3.80669	11	11
MYH7	higher in L4/5	L5/S1	L4/5	11	11	26.6539	30.8656	-4.21169	11	11
MYL1	higher in L4/5	L5/S1	L4/5	11	11	25.9456	28.7311	-2.78551	8	10
MYL3	higher in L4/5	L5/S1	L4/5	11	11	26.3998	29.3933	-2.9935	3	6
MYOZ1	higher in L4/5	L5/S1	L4/5	11	11	24.3316	26.9241	-2.5925	1	1
PDLIM5	higher in L4/5	L5/S1	L4/5	11	11	23.2418	26.7736	-3.5318	1	2
POFUT2	higher in L4/5	L5/S1	L4/5	11	11	27.8055	30.2043	-2.39883	2	3
PON1	higher in L4/5	L5/S1	L4/5	11	11	21.5984	23.6011	-2.00265	2	6
SLC25A4	higher in L4/5	L5/S1	L4/5	11	11	23.8073	26.3448	-2.53747	3	2
SSBP1	higher in L4/5	L5/S1	L4/5	11	11	26.2382	28.5071	-2.2689	2	1
TMOD4	higher in L4/5	L5/S1	L4/5	11	11	23.2637	25.8569	-2.5932	1	2
TNNC2	higher in L4/5	L5/S1	L4/5	11	11	24.8348	26.9371	-2.10221	4	7
TPM1	higher in L4/5	L5/S1	L4/5	11	11	25.8232	28.8318	-3.00867	7	8
TPT1	higher in L4/5	L5/S1	L4/5	11	11	24.8954	27.0475	-2.1521	3	1
UQCRC1	higher in L4/5	L5/S1	L4/5	11	11	23.3429	25.8784	-2.53545	2	1
VAPA	higher in L4/5	L5/S1	L4/5	11	11	23.1997	25.7617	-2.562	1	1

[truncated: 37 more sheets: Sheet10, Sheet11, Sheet12, Sheet13, Sheet14, Sheet15, Sheet16, Sheet17, Sheet18, Sheet19, Sheet20, Sheet21, Sheet22, Sheet23, Sheet24, Sheet25, Sheet26, Sheet27, Sheet28, Sheet29 …]
