# Supplementary material for: DIPPER, a spatiotemporal proteomics atlas of human intervertebral discs for exploring ageing and degeneration dynamics
Source: eLife. 2020 Dec 31;9:e64940. doi: 10.7554/eLife.64940 (PMC7857729; doi:10.7554/eLife.64940)
Supplement: Supplementary file 3. [file elife-64940-supp3.xlsx]

## Sheet: Summary of datasheets
Supplementary File 3 - Differentially Expressed Proteins (DEPs) detected among comparisons within the aged discs only
Comparison No.	Data-Sheet ID	Scope	Approach	Group1	Number of Samples in Group1	Group2	Number of Samples in Group 2	Num of DEPs
1	Sheet 1	Within aged profiles only	Statistical	inner disc region	21	OAF	12	109
	Sheet 2	Within aged profiles only	Fold-change>2	inner disc region	21	OAF	12	228
	Sheet 3	Within aged profiles only	Exclusively detected in one group only	inner disc region	21	OAF	12	43
2	Sheet 4	Within aged profiles only	Fold-change>2	NP and NP/IAF	15	IAF and OAF	18	170
	Sheet 5	Within aged profiles only	Exclusively detected in one group only	NP and NP/IAF	15	IAF and OAF	18	21
	Sheet 6	Within aged profiles only	Statistical	NP and NP/IAF	15	IAF and OAF	18	83
3	Sheet 7	Within aged profiles only	Fold-change>2	NP, NP/IAF and OAF	27	IAF	6	101
	Sheet 8	Within aged profiles only	Exclusively detected in one group only	NP, NP/IAF and OAF	27	IAF	6	3
	N/A	Within aged profiles only	Statistical	NP, NP/IAF and OAF	27	IAF	6	0
4	Sheet 9	Within aged profiles only	Statistical	L5/S1	11	L4/5	11	16
	Sheet 10	Within aged profiles only	Exclusively detected in one group only	L5/S1	11	L4/5	11	6
	Sheet 11	Within aged profiles only	Fold-change>2	L5/S1	11	L4/5	11	74
5	Sheet 12	Within aged profiles only	Fold-change>2	L5/S1	11	L3/4	11	154
	Sheet 13	Within aged profiles only	Exclusively detected in one group only	L5/S1	11	L3/4	11	29
	Sheet 14	Within aged profiles only	Statistical	L5/S1	11	L3/4	11	71
6	Sheet 15	Within aged profiles only	Exclusively detected in one group only	L3/4	11	L4/5	11	10
	Sheet 16	Within aged profiles only	Statistical	L3/4	11	L4/5	11	2
	Sheet 17	Within aged profiles only	Fold-change>2	L3/4	11	L4/5	11	77
7	Sheet 18	Within aged profiles only	Statistical	L5/S1	11	L3/4 and L4/5	22	65
	Sheet 19	Within aged profiles only	Fold-change>2	L5/S1	11	L3/4 and L4/5	22	89
	Sheet 20	Within aged profiles only	Exclusively detected in one group only	L5/S1	11	L3/4 and L4/5	22	9
8	Sheet 21	Within aged profiles only	Fold-change>2	Anterior & posterior@OAF	6	Left&Right@OA	6	141
	Sheet 22	Within aged profiles only	Exclusively detected in one group only	Anterior & posterior@OAF	6	Left&Right@OAF	6	8
	N/A	Within aged profiles only	Statistical	Anterior & posterior@OAF	6	Left&Right@OAF	6	0
9	Sheet 23	Within aged profiles only	Fold-change>2	Anterior & posterior@NP/IAF	6	Left&Right@NP/IAF	6	20
	Sheet 24	Within aged profiles only	Exclusively detected in one group only	Anterior & posterior@NP/IAF	6	Left&Right@NP/IAF	6	3
	N/A	Within aged profiles only	Statistical	Anterior & posterior@NP/IAF	6	Left&Right@NP/IAF	6	0
10	Sheet 25	Within aged profiles only	Exclusively detected in one group only	Left & Right@IAF	6	Left & Right@OAF	6	215
	Sheet 26	Within aged profiles only	Fold-change>2	Left & Right@IAF	6	Left & Right@OAF	6	343
	Sheet 27	Within aged profiles only	Statistical	Left & Right@IAF	6	Left & Right@OAF	6	5
11	Sheet 28	Within aged profiles only	Fold-change>2	NP/IAF	12	OAF	12	212
	Sheet 29	Within aged profiles only	Exclusively detected in one group only	NP/IAF	12	OAF	12	94
	Sheet 30	Within aged profiles only	Statistical	NP/IAF	12	OAF	12	99
12	Sheet 31	Within aged profiles only	Statistical	Left & Right@NP/IAF	6	Left & Right@OAF	6	20
	Sheet 32	Within aged profiles only	Exclusively detected in one group only	Left & Right@NP/IAF	6	Left & Right@OAF	6	309
	Sheet 33	Within aged profiles only	Fold-change>2	Left & Right@NP/IAF	6	Left & Right@OAF	6	338
13	Sheet 34	Within aged profiles only	Fold-change>2	Anterior & posterior@NP/IAF	6	Anterior & posterior@OAF	6	151
	Sheet 35	Within aged profiles only	Exclusively detected in one group only	Anterior & posterior@NP/IAF	6	Anterior & posterior@OAF	6	68
	N/A	Within aged profiles only	Statistical	Anterior & posterior@NP/IAF	6	Anterior & posterior@OAF	6	0
14	Sheet 36	Within aged profiles only	Fold-change>2	NP	3	NP/IAF	12	30
	Sheet 37	Within aged profiles only	Exclusively detected in one group only	NP	3	NP/IAF	12	9
	N/A	Within aged profiles only	Statistical	NP	3	NP/IAF	12	0
15	Sheet 38	Within aged profiles only	Statistical	IAF	6	OAF	12	17
	Sheet 39	Within aged profiles only	Fold-change>2	IAF	6	OAF	12	236
	Sheet 40	Within aged profiles only	Exclusively detected in one group only	IAF	6	OAF	12	73
16	Sheet 35	Within young profiles only	Fold-change>2	NP	3	OAF	12	261
	Sheet 36	Within young profiles only	Exclusively detected in one group only	NP	3	OAF	12	212
	Sheet 37	Within young profiles only	Statistical	NP	3	OAF	12	18
17	Sheet 44	Within aged profiles only	Fold-change>2	All left	9	All right	9	49
	N/A	Within aged profiles only	Exclusively detected in one group only	All left	9	All right	9	0
	N/A	Within aged profiles only	Statistical	All left	9	All right	9	0
18	Sheet 45	Within aged profiles only	Exclusively detected in one group only	Left@NP/IAF, OAF	6	Right@NP/IAF, OAF	6	2
	Sheet 46	Within aged profiles only	Fold-change>2	Left@NP/IAF, OAF	6	Right@NP/IAF, OAF	6	57
	N/A	Within aged profiles only	Statistical	Left@NP/IAF, OAF	6	Right@NP/IAF, OAF	6	0
19	Sheet 47	Within aged profiles only	Fold-change>2	All left & Right	18	All anterior & posterior	12	45
	N/A	Within aged profiles only	Exclusively detected in one group only	All left & Right	18	All anterior & posterior	12	0
	N/A	Within aged profiles only	Statistical	All left & Right	18	All anterior & posterior	12	0
20	Sheet 48	Within aged profiles only	Fold-change>2	All anterior	6	All posterior	6	103
	Sheet 49	Within aged profiles only	Exclusively detected in one group only	All anterior	6	All posterior	6	8
	N/A	Within aged profiles only	Statistical	All anterior	6	All posterior	6	0
21	Sheet 50	Within aged profiles only	Fold-change>2	Left & Right@NP/IAF, OAF	12	Anterior & posterior@NP/IAF, OAF	12	82
	N/A	Within aged profiles only	Exclusively detected in one group only	Left & Right@NP/IAF, OAF	12	Anterior & posterior@NP/IAF, OAF	12	0
	N/A	Within aged profiles only	Statistical	Left & Right@NP/IAF, OAF	12	Anterior & posterior@NP/IAF, OAF	12	0

## Sheet: Sheet 1
gene	status	group1	group2	Num of samples in group1	Num of samples in group2	average log2(LFQ) in group1	average log2(LFQ) in group2	log2(Fold change)	Num of valid values in group1	Num of valid values in group2	p-value
A2M	higher in inner disc	inner disc	OAF	21	12	35.4993142857143	33.5199833333333	1.97933095238095	21	12	1.16215467306839e-06
ACTA2	higher in OAF	inner disc	OAF	21	12	30.3344904761905	32.8854083333333	-2.55091785714286	21	12	0.000108296742209663
ACTG1	higher in OAF	inner disc	OAF	21	12	30.6642476190476	32.8927083333333	-2.22846071428571	21	12	6.22561013866237e-06
ACTN4	higher in OAF	inner disc	OAF	21	12	26.7019722222222	29.64195	-2.93997777777778	18	12	6.57401873244399e-06
AHNAK	higher in OAF	inner disc	OAF	21	12	26.9642047619048	32.1868666666667	-5.2226619047619	21	12	1.27443529002638e-09
AK1	higher in OAF	inner disc	OAF	21	12	27.021475	28.7880833333333	-1.76660833333333	16	12	9.26744539395282e-05
ANGPTL4	higher in inner disc	inner disc	OAF	21	12	27.8604857142857	25.84719	2.01329571428571	14	10	2.08088575186313e-05
ANXA1	higher in OAF	inner disc	OAF	21	12	30.7248619047619	32.2814083333333	-1.55654642857143	21	12	3.89615319065153e-08
ANXA2	higher in OAF	inner disc	OAF	21	12	31.0836285714286	33.465475	-2.38184642857142	21	12	5.77367279367947e-07
ANXA4	higher in OAF	inner disc	OAF	21	12	28.7627380952381	30.837125	-2.07438690476191	21	12	1.5308290268345e-07
ANXA5	higher in OAF	inner disc	OAF	21	12	30.875319047619	32.0596166666667	-1.18429761904762	21	12	1.49466302870768e-06
ANXA6	higher in OAF	inner disc	OAF	21	12	27.7796904761905	30.352425	-2.57273452380952	21	12	6.0668032668642e-10
ARF1	higher in OAF	inner disc	OAF	21	12	26.3124	27.5544666666667	-1.24206666666667	16	12	9.39041589811784e-05
ARHGDIA	higher in OAF	inner disc	OAF	21	12	27.2912647058824	28.8757	-1.58443529411765	17	12	1.68865738267237e-05
ATP5A1	higher in OAF	inner disc	OAF	21	12	25.2590842105263	29.2532333333333	-3.99414912280702	19	12	1.34202874689619e-05
ATP5B	higher in OAF	inner disc	OAF	21	12	25.3255052631579	29.649875	-4.32436973684211	19	12	2.17972435785853e-05
ATRN	higher in inner disc	inner disc	OAF	21	12	27.4634166666667	25.576775	1.88664166666667	18	8	1.18894238331829e-05
BLVRB	higher in OAF	inner disc	OAF	21	12	25.69046875	28.428875	-2.73840625	16	12	1.30627986045621e-06
C1S	higher in inner disc	inner disc	OAF	21	12	31.6667904761905	30.309375	1.35741547619048	21	12	5.30649097108534e-05
CA1	higher in OAF	inner disc	OAF	21	12	25.8567764705882	29.5569333333333	-3.7001568627451	17	12	1.0572236516083e-06
CALM3	higher in OAF	inner disc	OAF	21	12	27.9345666666667	30.0055666666667	-2.071	18	12	2.09289388964457e-05
CALR	higher in OAF	inner disc	OAF	21	12	26.5848578947368	29.7105416666667	-3.12568377192983	19	12	2.38340430998073e-06
CAP1	higher in OAF	inner disc	OAF	21	12	25.1572823529412	28.478525	-3.32124264705882	17	12	1.74414246126484e-05
CAPG	higher in OAF	inner disc	OAF	21	12	26.2018736842105	28.4326818181818	-2.23080813397129	19	11	1.9414285388328e-06
CAT	higher in OAF	inner disc	OAF	21	12	25.19794375	28.7121416666667	-3.51419791666667	16	12	1.98682728067263e-06
CFHR2	higher in inner disc	inner disc	OAF	21	12	28.2510692307692	26.3037444444444	1.94732478632479	13	9	9.74325488607599e-05
CFL1	higher in OAF	inner disc	OAF	21	12	26.6095944444444	29.8341583333333	-3.22456388888889	18	12	1.80856177741184e-07
CHI3L2	higher in inner disc	inner disc	OAF	21	12	27.934385	25.6332571428571	2.30112785714286	20	7	1.22630973052095e-07
CLIC1	higher in OAF	inner disc	OAF	21	12	25.8741647058824	28.0994833333333	-2.22531862745098	17	12	7.51021938317958e-07
COL12A1	higher in OAF	inner disc	OAF	21	12	29.4570571428571	33.66695	-4.20989285714286	21	12	1.74113163896283e-05
COL1A1	higher in OAF	inner disc	OAF	21	12	32.110719047619	33.9685416666667	-1.85782261904762	21	12	2.06134350115912e-06
COL6A1	higher in OAF	inner disc	OAF	21	12	33.8019238095238	35.9503416666667	-2.14841785714286	21	12	4.19358902483887e-06
COL6A2	higher in OAF	inner disc	OAF	21	12	32.8067523809524	35.11295	-2.30619761904762	21	12	7.46795530200355e-08
COL6A3	higher in OAF	inner disc	OAF	21	12	35.1478047619048	37.2570916666667	-2.10928690476191	21	12	2.88013545082519e-06
CRYAB	higher in OAF	inner disc	OAF	21	12	27.2008380952381	29.0871166666667	-1.88627857142857	21	12	5.3309577586421e-05
CTSD	higher in OAF	inner disc	OAF	21	12	27.9085047619048	29.8849083333333	-1.97640357142857	21	12	1.19949475809178e-06
DSTN	higher in OAF	inner disc	OAF	21	12	26.29525	28.0307583333333	-1.73550833333333	14	12	4.65059667984848e-05
EEF1A1	higher in OAF	inner disc	OAF	21	12	28.1966238095238	30.078425	-1.88180119047619	21	12	2.86612435072487e-08
EEF2	higher in OAF	inner disc	OAF	21	12	25.6165352941176	28.0604	-2.44386470588235	17	12	4.48599689765851e-06
ENO1	higher in OAF	inner disc	OAF	21	12	32.2173476190476	33.3246833333333	-1.10733571428571	21	12	3.5507364873614e-07
FBN1	higher in OAF	inner disc	OAF	21	12	29.5915619047619	31.2998833333333	-1.70832142857143	21	12	8.52221301038724e-08
FLNA	higher in OAF	inner disc	OAF	21	12	25.80172	30.586175	-4.784455	20	12	2.84449135483741e-05
FSCN1	higher in OAF	inner disc	OAF	21	12	24.962	27.4986416666667	-2.53664166666667	14	12	1.40491075544266e-06
GAPDH	higher in OAF	inner disc	OAF	21	12	31.0626714285714	32.703375	-1.64070357142857	21	12	6.07096776637936e-05
GDI2	higher in OAF	inner disc	OAF	21	12	26.4085857142857	28.5813166666667	-2.17273095238095	21	12	6.01403001492261e-05
GPI	higher in OAF	inner disc	OAF	21	12	25.9592941176471	27.8948416666667	-1.93554754901961	17	12	8.15842878163897e-05
GSTP1	higher in OAF	inner disc	OAF	21	12	27.59123	29.60085	-2.00962	20	12	2.80074802045495e-09
HBA1	higher in OAF	inner disc	OAF	21	12	32.0344142857143	34.9796666666667	-2.94525238095238	21	12	5.41983750112207e-07
HBB	higher in OAF	inner disc	OAF	21	12	33.5455857142857	36.3997583333333	-2.85417261904762	21	12	1.50153922931105e-08
HBD	higher in OAF	inner disc	OAF	21	12	28.406085	31.4884	-3.082315	20	12	8.16135241070219e-09
HIST1H1C	higher in OAF	inner disc	OAF	21	12	28.3835611111111	30.8994166666667	-2.51585555555556	18	12	6.91241245561883e-06
HIST1H2BL	higher in OAF	inner disc	OAF	21	12	29.4154428571429	31.9893	-2.57385714285714	21	12	8.63954760386261e-06
HIST2H2AC	higher in OAF	inner disc	OAF	21	12	27.5638	30.1642666666667	-2.60046666666667	21	12	9.94621991381857e-06
HNRNPA2B1	higher in OAF	inner disc	OAF	21	12	25.3465636363636	28.0568	-2.71023636363636	11	12	3.80154083911037e-05
HSP90AA1	higher in OAF	inner disc	OAF	21	12	27.727680952381	30.5917333333333	-2.86405238095238	21	12	5.65915493604901e-09
HSP90AB1	higher in OAF	inner disc	OAF	21	12	25.6540411764706	28.6571583333333	-3.00311715686275	17	12	2.50405395301565e-08
HSP90B1	higher in OAF	inner disc	OAF	21	12	29.0167619047619	30.5495666666667	-1.53280476190476	21	12	2.95148526907478e-05
HSPA1B	higher in OAF	inner disc	OAF	21	12	27.4189571428571	30.9342833333333	-3.51532619047619	21	12	2.77765598711738e-08
HSPA5	higher in OAF	inner disc	OAF	21	12	28.9680857142857	30.2655083333333	-1.29742261904762	21	12	8.12046726227422e-05
HSPA8	higher in OAF	inner disc	OAF	21	12	27.9034238095238	30.5310583333333	-2.62763452380953	21	12	4.53387012264915e-05
HSPG2	higher in OAF	inner disc	OAF	21	12	33.178019047619	33.8552833333333	-0.677264285714287	21	12	3.8397934641102e-05
IQGAP1	higher in OAF	inner disc	OAF	21	12	27.274425	30.7182416666667	-3.44381666666667	20	12	1.84637874252834e-09
LAMA5	higher in OAF	inner disc	OAF	21	12	25.6324444444444	27.4738416666667	-1.84139722222222	18	12	0.000111030346189845
LDHB	higher in OAF	inner disc	OAF	21	12	25.6837333333333	27.772	-2.08826666666667	15	12	3.27470029006583e-05
LMNA	higher in OAF	inner disc	OAF	21	12	28.8091095238095	32.7132166666667	-3.90410714285714	21	12	8.39761955048937e-07
LOX	higher in OAF	inner disc	OAF	21	12	27.297955	29.2498583333333	-1.95190333333333	20	12	2.95266183607553e-07
MAMDC2	higher in OAF	inner disc	OAF	21	12	24.8521846153846	28.0017727272727	-3.14958811188811	13	11	1.69520772612618e-06
MSN	higher in OAF	inner disc	OAF	21	12	28.7129523809524	30.2595083333333	-1.54655595238095	21	12	8.3538770926555e-11
MYH9	higher in OAF	inner disc	OAF	21	12	24.8631285714286	31.1306833333333	-6.26755476190476	21	12	7.52617649895222e-09
NID2	higher in OAF	inner disc	OAF	21	12	28.4599666666667	30.3374416666667	-1.877475	21	12	4.09345397588912e-05
P4HB	higher in OAF	inner disc	OAF	21	12	28.9510714285714	30.2540166666667	-1.30294523809524	21	12	8.29293231829304e-05
PARK7	higher in OAF	inner disc	OAF	21	12	26.2935	28.6816416666667	-2.38814166666667	14	12	4.15296921717536e-05
PDIA3	higher in OAF	inner disc	OAF	21	12	28.7208476190476	30.3653	-1.64445238095238	21	12	7.02500531479564e-05
PDIA6	higher in OAF	inner disc	OAF	21	12	27.0374684210526	28.82985	-1.79238157894737	19	12	4.37456863243944e-05
PEBP1	higher in OAF	inner disc	OAF	21	12	27.46444	30.0664166666667	-2.60197666666667	20	12	4.11600643184064e-06
PFN1	higher in OAF	inner disc	OAF	21	12	26.5868117647059	29.471775	-2.88496323529412	17	12	3.13550294529895e-07
PGK1	higher in OAF	inner disc	OAF	21	12	30.846	32.2003833333333	-1.35438333333333	21	12	2.42376643304389e-07
PKM	higher in OAF	inner disc	OAF	21	12	30.8153714285714	32.651375	-1.83600357142857	21	12	6.95449465468252e-11
PLEC	higher in OAF	inner disc	OAF	21	12	25.408580952381	30.2489916666667	-4.84041071428572	21	12	2.92732348676106e-05
PLS3	higher in OAF	inner disc	OAF	21	12	25.4011619047619	28.4572583333333	-3.05609642857143	21	12	1.26617629720919e-05
PPIA	higher in OAF	inner disc	OAF	21	12	28.5622047619048	30.8226833333333	-2.26047857142857	21	12	8.56420300535717e-07
PRDX1	higher in OAF	inner disc	OAF	21	12	28.609380952381	30.2337333333333	-1.62435238095238	21	12	1.95237826147714e-07
PRDX2	higher in OAF	inner disc	OAF	21	12	26.9610052631579	29.2241083333333	-2.26310307017544	19	12	4.37469484472096e-06
PRDX6	higher in OAF	inner disc	OAF	21	12	27.8682714285714	29.8053	-1.93702857142857	21	12	3.13926431808308e-06
PTRF	higher in OAF	inner disc	OAF	21	12	26.17382	29.3123	-3.13848	15	12	6.22682498672649e-05
RBP4	higher in inner disc	inner disc	OAF	21	12	29.803819047619	28.1818166666667	1.62200238095238	21	12	7.46450892049981e-05
RNH1	higher in OAF	inner disc	OAF	21	12	24.7887133333333	28.3662166666667	-3.57750333333333	15	12	1.54468953775337e-07
RPS27A	higher in OAF	inner disc	OAF	21	12	26.80898125	28.5835916666667	-1.77461041666667	16	12	1.29549825107214e-05
S100A4	higher in OAF	inner disc	OAF	21	12	27.8119684210526	28.9186666666667	-1.10669824561403	19	12	7.17026392403523e-05
S100A9	higher in OAF	inner disc	OAF	21	12	25.2461571428571	28.7503916666667	-3.50423452380952	14	12	9.00898690295328e-07
SELENBP1	higher in OAF	inner disc	OAF	21	12	24.5114181818182	27.2499916666667	-2.73857348484848	11	12	9.7864367137797e-06
SERPING1	higher in inner disc	inner disc	OAF	21	12	32.0969619047619	30.583975	1.51298690476191	21	12	3.15356754913417e-06
SOD1	higher in OAF	inner disc	OAF	21	12	26.3304533333333	29.203675	-2.87322166666667	15	12	3.63129370330013e-06
TAGLN2	higher in OAF	inner disc	OAF	21	12	26.8249846153846	29.0897333333333	-2.26474871794872	13	12	8.72542106575292e-05
THBS4	higher in OAF	inner disc	OAF	21	12	29.0588619047619	31.2545	-2.1956380952381	21	12	1.13454624421174e-05
TKT	higher in OAF	inner disc	OAF	21	12	25.3036941176471	28.08895	-2.78525588235294	17	12	2.01881573681077e-08
TNXB	higher in OAF	inner disc	OAF	21	12	27.9794095238095	31.7533	-3.77389047619048	21	12	1.09278250795432e-05
TPI1	higher in OAF	inner disc	OAF	21	12	29.6562571428571	31.379425	-1.72316785714285	21	12	4.1797375315977e-06
TPM3	higher in OAF	inner disc	OAF	21	12	26.938365	31.150225	-4.21186	20	12	2.6763014465798e-05
TUBA1B	higher in OAF	inner disc	OAF	21	12	26.929080952381	29.6814833333333	-2.75240238095238	21	12	1.08241963895389e-07
TUBB4B	higher in OAF	inner disc	OAF	21	12	27.22088	30.3677083333333	-3.14682833333333	20	12	3.3232689312567e-07
UBA1	higher in OAF	inner disc	OAF	21	12	25.4621583333333	28.3621666666667	-2.90000833333333	12	12	2.19353771598705e-06
UGP2	higher in OAF	inner disc	OAF	21	12	26.4174125	28.1876166666667	-1.77020416666667	16	12	9.17666944672347e-06
VASN	higher in inner disc	inner disc	OAF	21	12	26.0185764705882	24.8713714285714	1.14720504201681	17	7	5.31225286870758e-05
VCP	higher in OAF	inner disc	OAF	21	12	24.9280611111111	29.02105	-4.09298888888889	18	12	5.51806129144293e-06
VIM	higher in OAF	inner disc	OAF	21	12	32.0233	35.1167916666667	-3.09349166666667	21	12	1.04050640983656e-05
YWHAE	higher in OAF	inner disc	OAF	21	12	27.7376238095238	29.633125	-1.89550119047619	21	12	5.95185164613285e-09
YWHAQ	higher in OAF	inner disc	OAF	21	12	26.4586294117647	28.2289833333333	-1.77035392156862	17	12	4.58881969480587e-05
YWHAZ	higher in OAF	inner disc	OAF	21	12	28.281745	29.8659416666667	-1.58419666666667	20	12	7.19799064624806e-08

## Sheet: Sheet2
gene	status	group1	group2	Num of samples in group1	Num of samples in group2	average log2(LFQ) in group1	average log2(LFQ) in group2	log2(Fold change)	Num of valid values in group1	Num of valid values in group2
AP3B1	higher in inner disc	inner disc	OAF	21	12	26.0281	23.8842	2.1439	1	1
APOM	higher in inner disc	inner disc	OAF	21	12	28.569	26.53787	2.03113	14	10
CAPN3	higher in inner disc	inner disc	OAF	21	12	25.9928	23.4615	2.5313	2	1
CD5L	higher in inner disc	inner disc	OAF	21	12	29.5686933333333	27.4024	2.16629333333333	15	12
EIF4G1	higher in inner disc	inner disc	OAF	21	12	26.1416	24.1158	2.0258	2	2
EPYC	higher in inner disc	inner disc	OAF	21	12	29.5587095238095	26.2397333333333	3.31897619047619	21	9
ERAP1	higher in inner disc	inner disc	OAF	21	12	26.6994	24.378	2.3214	1	2
F13B	higher in inner disc	inner disc	OAF	21	12	27.8867625	25.7717666666667	2.11499583333333	16	9
HTRA3	higher in inner disc	inner disc	OAF	21	12	31.1758952380952	29.0294833333333	2.1464119047619	21	12
IGFALS	higher in inner disc	inner disc	OAF	21	12	29.13282	26.9188181818182	2.21400181818182	15	11
IGHD	higher in inner disc	inner disc	OAF	21	12	29.4611588235294	27.3701454545455	2.09101336898396	17	11
IGHV1-46	higher in inner disc	inner disc	OAF	21	12	29.83015	27.4892833333333	2.34086666666667	12	6
IGHV3-23	higher in inner disc	inner disc	OAF	21	12	30.2563666666667	28.0869666666667	2.1694	6	3
IGHV4-61	higher in inner disc	inner disc	OAF	21	12	28.6819666666667	26.368125	2.31384166666667	15	8
IGKV4-1	higher in inner disc	inner disc	OAF	21	12	29.4142090909091	27.1383714285714	2.27583766233766	11	7
INHBA	higher in inner disc	inner disc	OAF	21	12	30.3475047619048	27.6367833333333	2.71072142857143	21	12
LGALS3BP	higher in inner disc	inner disc	OAF	21	12	29.16835	26.4191166666667	2.74923333333333	12	12
LNPEP	higher in inner disc	inner disc	OAF	21	12	25.8997	23.5068	2.3929	1	1
MMP1	higher in inner disc	inner disc	OAF	21	12	24.8644	21.9241	2.9403	1	1
NEFH	higher in inner disc	inner disc	OAF	21	12	26.5038666666667	24.00995	2.49391666666667	3	2
NEO1	higher in inner disc	inner disc	OAF	21	12	24.2709	22.2154	2.0555	5	1
PON3	higher in inner disc	inner disc	OAF	21	12	27.9192	25.3496	2.5696	1	1
PREP	higher in inner disc	inner disc	OAF	21	12	28.6503	25.44055	3.20975	1	4
PRG4	higher in inner disc	inner disc	OAF	21	12	36.3602285714286	33.4258416666667	2.9343869047619	21	12
PROS1	higher in inner disc	inner disc	OAF	21	12	29.1496294117647	27.0233181818182	2.12631122994652	17	11
SERPINA4	higher in inner disc	inner disc	OAF	21	12	30.4694857142857	28.1033	2.36618571428571	21	12
SERPINA6	higher in inner disc	inner disc	OAF	21	12	28.961785	26.8487333333333	2.11305166666666	20	12
SERPINA7	higher in inner disc	inner disc	OAF	21	12	28.1842	25.97015	2.21405	14	8
SERPINE1	higher in inner disc	inner disc	OAF	21	12	29.2495857142857	26.8313	2.41828571428572	21	11
SHMT2	higher in inner disc	inner disc	OAF	21	12	26.3885	24.0384666666667	2.35003333333334	1	3
SNX9	higher in inner disc	inner disc	OAF	21	12	26.6223	24.23395	2.38835	1	2
THUMPD1	higher in inner disc	inner disc	OAF	21	12	25.3924	23.0363	2.3561	1	1
TIMP3	higher in inner disc	inner disc	OAF	21	12	31.4809714285714	29.3465666666667	2.13440476190476	21	12
TNFAIP6	higher in inner disc	inner disc	OAF	21	12	30.6125333333333	27.4827909090909	3.12974242424242	21	11
IGLV3-25	higher in inner disc	inner disc	OAF	21	12	27.5286428571429	25.21965	2.30899285714285	7	2
IGHV3-7	higher in inner disc	inner disc	OAF	21	12	28.2856923076923	26.1399	2.14579230769231	13	4
SEPT7	higher in OAF	inner disc	OAF	21	12	24.5365	27.3655	-2.829	2	9
ACO2	higher in OAF	inner disc	OAF	21	12	22.8757714285714	26.22037	-3.34459857142857	7	10
ACTN1	higher in OAF	inner disc	OAF	21	12	24.7579058823529	28.1926666666667	-3.43476078431373	17	12
ACTN2	higher in OAF	inner disc	OAF	21	12	26.9690619047619	29.310525	-2.3414630952381	21	12
ADH5	higher in OAF	inner disc	OAF	21	12	25.2175285714286	27.64826	-2.43073142857143	7	10
ADSSL1	higher in OAF	inner disc	OAF	21	12	22.7156	24.7385	-2.0229	1	1
AGL	higher in OAF	inner disc	OAF	21	12	25.0489	29.37805	-4.32915	1	2
AK3	higher in OAF	inner disc	OAF	21	12	24.9543	26.9879	-2.0336	2	3
AKR1A1	higher in OAF	inner disc	OAF	21	12	25.3158090909091	27.4768166666667	-2.16100757575758	11	12
AKR1B1	higher in OAF	inner disc	OAF	21	12	24.03828	26.22647	-2.18819	5	10
ALDH2	higher in OAF	inner disc	OAF	21	12	23.3164	26.83284	-3.51644	1	5
ALDOA	higher in OAF	inner disc	OAF	21	12	28.1461333333333	30.5177666666667	-2.37163333333333	21	12
ALDOC	higher in OAF	inner disc	OAF	21	12	26.2285875	28.2316909090909	-2.00310340909091	8	11
ANKRD2	higher in OAF	inner disc	OAF	21	12	25.32	28.1607666666667	-2.84076666666667	1	3
ANP32A	higher in OAF	inner disc	OAF	21	12	24.5824	27.3208666666667	-2.73846666666667	1	6
AOC3	higher in OAF	inner disc	OAF	21	12	23.2751	26.80834	-3.53324	1	5
ARHGAP1	higher in OAF	inner disc	OAF	21	12	23.7541333333333	27.25126	-3.49712666666667	3	5
ARHGDIB	higher in OAF	inner disc	OAF	21	12	24.1308333333333	27.6355222222222	-3.50468888888889	3	9
ARPC1B	higher in OAF	inner disc	OAF	21	12	24.4517	26.8722666666667	-2.42056666666667	1	6
ASPN	higher in OAF	inner disc	OAF	21	12	29.7961	32.8456666666667	-3.04956666666667	21	12
ATP5D	higher in OAF	inner disc	OAF	21	12	24.39845	27.1852714285714	-2.78682142857143	2	7
ATP5H	higher in OAF	inner disc	OAF	21	12	23.90185	26.3845285714286	-2.48267857142857	2	7
BASP1	higher in OAF	inner disc	OAF	21	12	24.949	27.9499714285714	-3.00097142857143	1	7
CA2	higher in OAF	inner disc	OAF	21	12	26.1149	28.4836916666667	-2.36879166666667	8	12
CA3	higher in OAF	inner disc	OAF	21	12	24.4479	30.44422	-5.99632	10	10
CANX	higher in OAF	inner disc	OAF	21	12	24.582175	27.34125	-2.759075	4	10
CAPN1	higher in OAF	inner disc	OAF	21	12	23.1286	26.574	-3.4454	1	5
CAPZA1	higher in OAF	inner disc	OAF	21	12	24.6109142857143	27.4502636363636	-2.83934935064935	7	11
CAPZA2	higher in OAF	inner disc	OAF	21	12	24.8756	27.6567818181818	-2.78118181818182	5	11
CAPZB	higher in OAF	inner disc	OAF	21	12	23.8357	26.9803181818182	-3.14461818181818	5	11
CBR1	higher in OAF	inner disc	OAF	21	12	24.8099714285714	27.0449333333333	-2.2349619047619	7	12
CCT6A	higher in OAF	inner disc	OAF	21	12	23.6181	26.5782166666667	-2.96011666666667	1	6
CCT8	higher in OAF	inner disc	OAF	21	12	24.0443666666667	26.1487363636364	-2.10436969696969	6	11
CD163	higher in OAF	inner disc	OAF	21	12	23.52234	26.2299857142857	-2.70764571428571	5	7
CD44	higher in OAF	inner disc	OAF	21	12	24.61924	26.9560714285714	-2.33683142857143	5	7
CFL2	higher in OAF	inner disc	OAF	21	12	23.7344	26.9343166666667	-3.19991666666667	1	6
CKM	higher in OAF	inner disc	OAF	21	12	26.7393157894737	29.8303916666667	-3.09107587719298	19	12
CKMT2	higher in OAF	inner disc	OAF	21	12	22.10425	27.6167666666667	-5.51251666666667	4	3
CLTC	higher in OAF	inner disc	OAF	21	12	24.1727357142857	27.2433583333333	-3.07062261904762	14	12
COL14A1	higher in OAF	inner disc	OAF	21	12	27.5965523809524	31.9885333333333	-4.39198095238095	21	12
COL4A1	higher in OAF	inner disc	OAF	21	12	25.15105	27.4078714285714	-2.25682142857143	2	7
COL4A2	higher in OAF	inner disc	OAF	21	12	25.39572	27.52132	-2.1256	5	10
CSTB	higher in OAF	inner disc	OAF	21	12	23.586	26.8357714285714	-3.24977142857143	1	7
CTSB	higher in OAF	inner disc	OAF	21	12	26.2223941176471	28.470625	-2.24823088235294	17	12
CTSG	higher in OAF	inner disc	OAF	21	12	25.8111333333333	28.0672222222222	-2.25608888888889	3	9
CTSZ	higher in OAF	inner disc	OAF	21	12	24.2598	26.33564	-2.07584	3	10
CYB5R3	higher in OAF	inner disc	OAF	21	12	24.83905	27.3582	-2.51915	4	8
DCTN2	higher in OAF	inner disc	OAF	21	12	24.4619	26.8591625	-2.3972625	2	8
DES	higher in OAF	inner disc	OAF	21	12	25.1977882352941	27.5348777777778	-2.33708954248366	17	9
DMD	higher in OAF	inner disc	OAF	21	12	24.09554	26.976	-2.88046	5	3
DNASE1L3	higher in OAF	inner disc	OAF	21	12	23.269	25.5934	-2.3244	1	1
DPYSL2	higher in OAF	inner disc	OAF	21	12	24.60154375	28.3178583333333	-3.71631458333333	16	12
DPYSL3	higher in OAF	inner disc	OAF	21	12	24.0889571428571	27.9533909090909	-3.86443376623377	14	11
EEF1A2	higher in OAF	inner disc	OAF	21	12	25.9665	28.1257	-2.1592	1	2
EHD2	higher in OAF	inner disc	OAF	21	12	25.6453125	28.3655833333333	-2.72027083333333	16	12
EIF2S1	higher in OAF	inner disc	OAF	21	12	23.5601	27.01734	-3.45724	3	5
EIF5A	higher in OAF	inner disc	OAF	21	12	24.36286	26.8967333333333	-2.53387333333333	5	9
ENO3	higher in OAF	inner disc	OAF	21	12	23.35965	27.9841	-4.62445	4	5
ESD	higher in OAF	inner disc	OAF	21	12	24.15068	26.70781	-2.55713	5	10
FABP3	higher in OAF	inner disc	OAF	21	12	26.0402	28.7926666666667	-2.75246666666667	13	12
FABP4	higher in OAF	inner disc	OAF	21	12	25.8255875	29.9909545454545	-4.16536704545454	8	11
FABP5	higher in OAF	inner disc	OAF	21	12	25.07675	27.7607181818182	-2.68396818181818	6	11
FBLN1	higher in OAF	inner disc	OAF	21	12	29.2220157894737	31.6359916666667	-2.41397587719298	19	12
FH	higher in OAF	inner disc	OAF	21	12	24.3522	26.6543833333333	-2.30218333333333	1	6
FHL1	higher in OAF	inner disc	OAF	21	12	26.7895214285714	29.93525	-3.14572857142857	14	12
FLNB	higher in OAF	inner disc	OAF	21	12	25.7788357142857	28.4589818181818	-2.68014610389611	14	11
FLNC	higher in OAF	inner disc	OAF	21	12	24.3938533333333	26.5930818181818	-2.19922848484849	15	11
GLUD1	higher in OAF	inner disc	OAF	21	12	23.5430333333333	27.5325333333333	-3.9895	6	9
GPD1	higher in OAF	inner disc	OAF	21	12	24.3181	27.38366	-3.06556	6	5
HADHB	higher in OAF	inner disc	OAF	21	12	24.3995666666667	27.3369	-2.93733333333333	3	8
HDGF	higher in OAF	inner disc	OAF	21	12	24.30836	26.9918727272727	-2.68351272727273	5	11
HINT1	higher in OAF	inner disc	OAF	21	12	24.3296	26.72442	-2.39482	1	5
HNRNPA1	higher in OAF	inner disc	OAF	21	12	25.1353571428571	27.2229333333333	-2.08757619047619	7	12
HNRNPA3	higher in OAF	inner disc	OAF	21	12	24.94335	27.4611	-2.51775	2	10
HNRNPK	higher in OAF	inner disc	OAF	21	12	24.7347	27.8980416666667	-3.16334166666667	7	12
HNRNPL	higher in OAF	inner disc	OAF	21	12	22.8677	25.95562	-3.08792	1	5
HNRNPM	higher in OAF	inner disc	OAF	21	12	24.87498	27.0100142857143	-2.13503428571428	5	7
HNRNPU	higher in OAF	inner disc	OAF	21	12	23.0347	27.02025	-3.98555	1	8
HSD17B10	higher in OAF	inner disc	OAF	21	12	23.3644	26.118775	-2.754375	1	4
HSPA9	higher in OAF	inner disc	OAF	21	12	23.9709571428571	27.15661	-3.18565285714286	7	10
HSPB1	higher in OAF	inner disc	OAF	21	12	25.8174222222222	29.71845	-3.90102777777778	9	12
IDH1	higher in OAF	inner disc	OAF	21	12	24.17175	26.73205	-2.5603	8	12
IDH2	higher in OAF	inner disc	OAF	21	12	22.8620333333333	26.07375	-3.21171666666667	6	8
KLHL41	higher in OAF	inner disc	OAF	21	12	23.3642333333333	27.0761333333333	-3.7119	3	3
LAMA4	higher in OAF	inner disc	OAF	21	12	24.32353125	27.5610272727273	-3.23749602272727	16	11
LAMB1	higher in OAF	inner disc	OAF	21	12	24.9373923076923	27.4954181818182	-2.55802587412587	13	11
LAMB2	higher in OAF	inner disc	OAF	21	12	24.45167	27.9342416666667	-3.48257166666667	20	12
LAMC1	higher in OAF	inner disc	OAF	21	12	25.4383714285714	29.0132333333333	-3.5748619047619	21	12
LCP1	higher in OAF	inner disc	OAF	21	12	25.70409375	27.7711833333333	-2.06708958333333	16	12
LDB3	higher in OAF	inner disc	OAF	21	12	23.5125	26.609025	-3.096525	5	4
LGALS1	higher in OAF	inner disc	OAF	21	12	25.5894	28.75025	-3.16085	10	12
LMNB2	higher in OAF	inner disc	OAF	21	12	26.131	28.7944090909091	-2.66340909090909	10	11
LRRC59	higher in OAF	inner disc	OAF	21	12	23.1677	25.3478166666667	-2.18011666666667	1	6
MB	higher in OAF	inner disc	OAF	21	12	26.42352	30.6102545454545	-4.18673454545455	10	11
MDH1	higher in OAF	inner disc	OAF	21	12	25.7776375	27.9704083333333	-2.19277083333333	16	12
MDH2	higher in OAF	inner disc	OAF	21	12	24.07578	27.6012636363636	-3.52548363636364	5	11
MPO	higher in OAF	inner disc	OAF	21	12	24.64335	27.784275	-3.140925	8	12
MVP	higher in OAF	inner disc	OAF	21	12	24.85965	27.0174583333333	-2.15780833333334	12	12
MYBPC1	higher in OAF	inner disc	OAF	21	12	22.0883611111111	24.8181916666667	-2.72983055555556	18	12
MYBPC2	higher in OAF	inner disc	OAF	21	12	22.8102625	26.0097857142857	-3.19952321428571	8	7
MYH1	higher in OAF	inner disc	OAF	21	12	24.0286285714286	28.0661083333333	-4.03747976190476	21	12
MYH10	higher in OAF	inner disc	OAF	21	12	24.7544181818182	27.5629363636364	-2.80851818181818	11	11
MYH11	higher in OAF	inner disc	OAF	21	12	23.4012789473684	27.3483272727273	-3.94704832535885	19	11
MYH2	higher in OAF	inner disc	OAF	21	12	23.36442	26.4763583333333	-3.11193833333333	20	12
MYH4	higher in OAF	inner disc	OAF	21	12	24.9199714285714	29.7020333333333	-4.7820619047619	7	3
MYH7	higher in OAF	inner disc	OAF	21	12	28.1498428571429	31.5890916666667	-3.43924880952381	21	12
MYL1	higher in OAF	inner disc	OAF	21	12	24.7845875	27.95525	-3.1706625	16	12
MYL12A	higher in OAF	inner disc	OAF	21	12	23.2961888888889	27.3453636363636	-4.04917474747475	9	11
MYL2	higher in OAF	inner disc	OAF	21	12	25.3153111111111	27.5732909090909	-2.2579797979798	9	11
MYL3	higher in OAF	inner disc	OAF	21	12	24.6132888888889	28.0733111111111	-3.46002222222222	9	9
MYL6	higher in OAF	inner disc	OAF	21	12	25.3466714285714	28.311025	-2.96435357142857	7	12
MYL6B	higher in OAF	inner disc	OAF	21	12	24.0930363636364	27.61793	-3.52489363636364	11	10
MYLPF	higher in OAF	inner disc	OAF	21	12	23.59698	27.885675	-4.288695	10	8
MYOC	higher in OAF	inner disc	OAF	21	12	23.6973714285714	26.50807	-2.81069857142857	14	10
MYOF	higher in OAF	inner disc	OAF	21	12	25.66235	28.6578	-2.99545	6	7
MYOM1	higher in OAF	inner disc	OAF	21	12	21.8135714285714	27.44465	-5.63107857142857	7	4
MYOZ1	higher in OAF	inner disc	OAF	21	12	24.0400333333333	27.2422	-3.20216666666667	3	3
NAP1L1	higher in OAF	inner disc	OAF	21	12	24.24645	26.376	-2.12955	2	5
NCL	higher in OAF	inner disc	OAF	21	12	26.7023727272727	28.7902583333333	-2.08788560606061	11	12
NID1	higher in OAF	inner disc	OAF	21	12	25.2686466666667	27.5898	-2.32115333333333	15	12
NME2	higher in OAF	inner disc	OAF	21	12	24.2474857142857	26.72792	-2.48043428571428	7	10
OLFML1	higher in OAF	inner disc	OAF	21	12	24.77226	27.71205	-2.93979	5	8
PAICS	higher in OAF	inner disc	OAF	21	12	22.2583	24.29365	-2.03535	1	4
PCBP1	higher in OAF	inner disc	OAF	21	12	24.52566	26.9354	-2.40974	5	7
PDHA1	higher in OAF	inner disc	OAF	21	12	22.4069	25.9452666666667	-3.53836666666666	1	3
PDIA4	higher in OAF	inner disc	OAF	21	12	26.1147047619048	28.63855	-2.52384523809524	21	12
PDLIM5	higher in OAF	inner disc	OAF	21	12	23.9	26.75425	-2.85425	1	4
PEA15	higher in OAF	inner disc	OAF	21	12	24.2905	26.4861166666667	-2.19561666666667	1	6
PGD	higher in OAF	inner disc	OAF	21	12	25.34115	27.4057454545455	-2.06459545454545	6	11
PHB	higher in OAF	inner disc	OAF	21	12	23.0044	26.7344142857143	-3.73001428571429	1	7
PLIN3	higher in OAF	inner disc	OAF	21	12	23.8045	26.8970428571429	-3.09254285714286	1	7
POSTN	higher in OAF	inner disc	OAF	21	12	29.0141952380952	31.2458666666667	-2.23167142857143	21	12
PSMA7	higher in OAF	inner disc	OAF	21	12	24.3282	26.4322181818182	-2.10401818181818	5	11
RAB7A	higher in OAF	inner disc	OAF	21	12	24.8577	27.0194363636364	-2.16173636363636	6	11
RAN	higher in OAF	inner disc	OAF	21	12	25.0097166666667	27.1384583333333	-2.12874166666667	6	12
RPL10	higher in OAF	inner disc	OAF	21	12	23.7197	26.54385	-2.82415	1	4
RPL12	higher in OAF	inner disc	OAF	21	12	24.28072	26.49995	-2.21923	5	12
RPL13A	higher in OAF	inner disc	OAF	21	12	23.703	25.9445125	-2.2415125	2	8
RPL27	higher in OAF	inner disc	OAF	21	12	24.005	26.5458166666667	-2.54081666666667	1	6
RPL31	higher in OAF	inner disc	OAF	21	12	24.09155	26.2867857142857	-2.19523571428572	2	7
RPL4	higher in OAF	inner disc	OAF	21	12	24.9779666666667	27.1287555555556	-2.15078888888889	6	9
RPLP2	higher in OAF	inner disc	OAF	21	12	25.3546555555556	28.0290454545455	-2.6743898989899	9	11
RPS11	higher in OAF	inner disc	OAF	21	12	23.4758	26.24662	-2.77082	1	5
RPS15A	higher in OAF	inner disc	OAF	21	12	23.2331	25.833	-2.5999	1	3
RPS19	higher in OAF	inner disc	OAF	21	12	25.543	27.6235	-2.0805	5	9
RPS20	higher in OAF	inner disc	OAF	21	12	24.35435	26.8526166666667	-2.49826666666667	2	6
RPS26	higher in OAF	inner disc	OAF	21	12	23.6699	26.37585	-2.70595	1	4
RPS3	higher in OAF	inner disc	OAF	21	12	25.6895444444444	27.9396166666667	-2.25007222222222	9	12
RPS4X	higher in OAF	inner disc	OAF	21	12	25.19078	27.8917	-2.70092	5	6
RPS8	higher in OAF	inner disc	OAF	21	12	24.9834714285714	27.4638	-2.48032857142857	14	12
RPS9	higher in OAF	inner disc	OAF	21	12	24.74928	27.1571888888889	-2.40790888888889	5	9
RPSA	higher in OAF	inner disc	OAF	21	12	24.7248333333333	26.8712416666667	-2.14640833333333	3	12
RRBP1	higher in OAF	inner disc	OAF	21	12	24.4305666666667	27.6213166666667	-3.19075	15	12
S100A10	higher in OAF	inner disc	OAF	21	12	25.5139777777778	27.68665	-2.17267222222222	9	8
SEC23A	higher in OAF	inner disc	OAF	21	12	23.049	25.7407666666667	-2.69176666666667	1	6
SERPINB1	higher in OAF	inner disc	OAF	21	12	24.1285875	27.2787909090909	-3.15020340909091	8	11
SERPINH1	higher in OAF	inner disc	OAF	21	12	24.8378882352941	28.7723	-3.93441176470589	17	10
SET	higher in OAF	inner disc	OAF	21	12	25.95995	28.0204090909091	-2.06045909090909	2	11
SH3BGRL3	higher in OAF	inner disc	OAF	21	12	24.2884	26.31243	-2.02403	3	10
SLC1A5	higher in OAF	inner disc	OAF	21	12	23.7936666666667	26.34625	-2.55258333333333	3	2
SLC25A4	higher in OAF	inner disc	OAF	21	12	23.0432	25.94264	-2.89944	1	5
SOD2	higher in OAF	inner disc	OAF	21	12	25.3329666666667	28.5789727272727	-3.24600606060606	12	11
SPON1	higher in OAF	inner disc	OAF	21	12	23.9370777777778	27.96346	-4.02638222222222	9	10
SPTAN1	higher in OAF	inner disc	OAF	21	12	25.012085	28.5118	-3.499715	20	12
SRL	higher in OAF	inner disc	OAF	21	12	23.9582666666667	26.3927	-2.43443333333333	3	4
SRPX	higher in OAF	inner disc	OAF	21	12	24.17885	26.21896	-2.04011	2	10
SRSF1	higher in OAF	inner disc	OAF	21	12	24.3959	26.45359	-2.05769	3	10
SRSF7	higher in OAF	inner disc	OAF	21	12	24.8467	27.2678857142857	-2.42118571428572	1	7
ST13	higher in OAF	inner disc	OAF	21	12	24.40425	27.5382888888889	-3.13403888888889	2	9
STIP1	higher in OAF	inner disc	OAF	21	12	23.8453	26.9894666666667	-3.14416666666666	2	6
SYNCRIP	higher in OAF	inner disc	OAF	21	12	23.349625	26.7680625	-3.4184375	4	8
TAGLN	higher in OAF	inner disc	OAF	21	12	26.1419666666667	28.404825	-2.26285833333333	12	12
THBS1	higher in OAF	inner disc	OAF	21	12	32.2137047619048	35.2310083333333	-3.01730357142857	21	12
TLN1	higher in OAF	inner disc	OAF	21	12	24.0760714285714	27.9322916666667	-3.85622023809524	14	12
TMOD4	higher in OAF	inner disc	OAF	21	12	24.5735	27.82315	-3.24965	1	2
TNC	higher in OAF	inner disc	OAF	21	12	31.3916047619048	34.7800416666667	-3.38843690476191	21	12
TNNC2	higher in OAF	inner disc	OAF	21	12	23.30915	26.7245375	-3.4153875	8	8
TNNI1	higher in OAF	inner disc	OAF	21	12	24.39235	27.83564	-3.44329	2	5
TNNI2	higher in OAF	inner disc	OAF	21	12	24.5116	29.2503	-4.7387	1	3
TNNT1	higher in OAF	inner disc	OAF	21	12	23.23372	27.74124	-4.50752	5	5
TNNT3	higher in OAF	inner disc	OAF	21	12	22.4711153846154	26.44573	-3.97461461538462	13	10
TPM1	higher in OAF	inner disc	OAF	21	12	24.66724	28.85735	-4.19011	10	12
TPM2	higher in OAF	inner disc	OAF	21	12	26.2233818181818	29.8446166666667	-3.62123484848485	11	12
TPM4	higher in OAF	inner disc	OAF	21	12	26.0803333333333	28.87847	-2.79813666666667	3	10
TPSAB1	higher in OAF	inner disc	OAF	21	12	23.8855	27.715675	-3.830175	4	8
TPT1	higher in OAF	inner disc	OAF	21	12	22.99584	26.0147888888889	-3.01894888888889	5	9
TRIM72	higher in OAF	inner disc	OAF	21	12	24.6420333333333	26.8359666666667	-2.19393333333333	3	3
TUBB	higher in OAF	inner disc	OAF	21	12	24.1084	27.59376	-3.48536	3	10
UBE2N	higher in OAF	inner disc	OAF	21	12	24.495875	26.7009166666667	-2.20504166666667	4	6
UQCRC1	higher in OAF	inner disc	OAF	21	12	22.7637	26.6441833333333	-3.88048333333333	1	6
VCL	higher in OAF	inner disc	OAF	21	12	25.7152842105263	29.013325	-3.29804078947368	19	12
VDAC1	higher in OAF	inner disc	OAF	21	12	24.3768	26.7639555555556	-2.38715555555556	5	9

## Sheet: Sheet 3
gene	status	group1	group2	Num of samples in group1	Num of samples in group2	Num of valid values in group1	Num of valid values in group2
WIF1	exclusive in inner disc	inner disc	OAF	21	12	16	0
AARS	exclusive in OAF	inner disc	OAF	21	12	0	9
AHCY	exclusive in OAF	inner disc	OAF	21	12	0	10
AIFM1	exclusive in OAF	inner disc	OAF	21	12	0	7
ARL3	exclusive in OAF	inner disc	OAF	21	12	0	7
ATP2B4	exclusive in OAF	inner disc	OAF	21	12	0	7
ATP6V1A	exclusive in OAF	inner disc	OAF	21	12	0	7
CD47	exclusive in OAF	inner disc	OAF	21	12	0	8
CIRBP	exclusive in OAF	inner disc	OAF	21	12	0	7
DBI	exclusive in OAF	inner disc	OAF	21	12	0	7
DPYD	exclusive in OAF	inner disc	OAF	21	12	0	7
EIF3B	exclusive in OAF	inner disc	OAF	21	12	0	7
EPB41L2	exclusive in OAF	inner disc	OAF	21	12	0	9
G6PD	exclusive in OAF	inner disc	OAF	21	12	0	7
GLRX	exclusive in OAF	inner disc	OAF	21	12	0	8
GPX1	exclusive in OAF	inner disc	OAF	21	12	0	9
GSTM2	exclusive in OAF	inner disc	OAF	21	12	0	9
HLA-A	exclusive in OAF	inner disc	OAF	21	12	0	7
KPNB1	exclusive in OAF	inner disc	OAF	21	12	0	7
LAMP1	exclusive in OAF	inner disc	OAF	21	12	0	7
MARCKS	exclusive in OAF	inner disc	OAF	21	12	0	7
NACA	exclusive in OAF	inner disc	OAF	21	12	0	7
PARVA	exclusive in OAF	inner disc	OAF	21	12	0	7
PDAP1	exclusive in OAF	inner disc	OAF	21	12	0	7
PGLS	exclusive in OAF	inner disc	OAF	21	12	0	7
PPP1CB	exclusive in OAF	inner disc	OAF	21	12	0	7
PRTN3	exclusive in OAF	inner disc	OAF	21	12	0	11
PSMD1	exclusive in OAF	inner disc	OAF	21	12	0	8
PSME1	exclusive in OAF	inner disc	OAF	21	12	0	7
RNASE2	exclusive in OAF	inner disc	OAF	21	12	0	8
RPS17	exclusive in OAF	inner disc	OAF	21	12	0	8
RPS2	exclusive in OAF	inner disc	OAF	21	12	0	7
RPS24	exclusive in OAF	inner disc	OAF	21	12	0	7
RPS25	exclusive in OAF	inner disc	OAF	21	12	0	7
RPS7	exclusive in OAF	inner disc	OAF	21	12	0	9
SARS	exclusive in OAF	inner disc	OAF	21	12	0	9
SFRP2	exclusive in OAF	inner disc	OAF	21	12	0	8
SH3BGRL	exclusive in OAF	inner disc	OAF	21	12	0	10
SNX3	exclusive in OAF	inner disc	OAF	21	12	0	7
TCP1	exclusive in OAF	inner disc	OAF	21	12	0	7
TPD52L2	exclusive in OAF	inner disc	OAF	21	12	0	9
TXNL1	exclusive in OAF	inner disc	OAF	21	12	0	7
YBX1	exclusive in OAF	inner disc	OAF	21	12	0	7

## Sheet: Sheet4
gene	status	group1	group2	Num of samples in group1	Num of samples in group2	average log2(LFQ) in group1	average log2(LFQ) in group2	log2(Fold change)	Num of valid values in group1	Num of valid values in group2
AFM	higher in NP and NP/IAF	NP and NP/IAF	IAF and OAF	15	18	30.3062	28.1507	2.15552	15	18
AP3B1	higher in NP and NP/IAF	NP and NP/IAF	IAF and OAF	15	18	26.0281	23.8842	2.1439	1	1
CAPN3	higher in NP and NP/IAF	NP and NP/IAF	IAF and OAF	15	18	25.9928	23.4615	2.5313	2	1
EPYC	higher in NP and NP/IAF	NP and NP/IAF	IAF and OAF	15	18	29.9064	27.2196	2.68682	15	15
ERAP1	higher in NP and NP/IAF	NP and NP/IAF	IAF and OAF	15	18	26.6994	24.378	2.3214	1	2
IGFALS	higher in NP and NP/IAF	NP and NP/IAF	IAF and OAF	15	18	29.5549	27.1997	2.35524	11	15
IGHD	higher in NP and NP/IAF	NP and NP/IAF	IAF and OAF	15	18	29.8156	27.7578	2.05781	12	16
IGHV4-61	higher in NP and NP/IAF	NP and NP/IAF	IAF and OAF	15	18	28.9547	26.7016	2.25314	12	11
INHBA	higher in NP and NP/IAF	NP and NP/IAF	IAF and OAF	15	18	30.5995	28.3303	2.26916	15	18
LGALS3BP	higher in NP and NP/IAF	NP and NP/IAF	IAF and OAF	15	18	28.9766	26.9489	2.0277	10	14
LNPEP	higher in NP and NP/IAF	NP and NP/IAF	IAF and OAF	15	18	25.8997	23.5068	2.3929	1	1
MMP1	higher in NP and NP/IAF	NP and NP/IAF	IAF and OAF	15	18	24.8644	21.9241	2.9403	1	1
NEFH	higher in NP and NP/IAF	NP and NP/IAF	IAF and OAF	15	18	26.5039	24.0099	2.49392	3	2
OBSCN	higher in NP and NP/IAF	NP and NP/IAF	IAF and OAF	15	18	28.368	26.0637	2.30432	1	8
POFUT2	higher in NP and NP/IAF	NP and NP/IAF	IAF and OAF	15	18	29.5794	26.7512	2.82822	3	8
PON1	higher in NP and NP/IAF	NP and NP/IAF	IAF and OAF	15	18	30.7474	28.3547	2.39263	12	17
PON3	higher in NP and NP/IAF	NP and NP/IAF	IAF and OAF	15	18	27.9192	25.3496	2.5696	1	1
PREP	higher in NP and NP/IAF	NP and NP/IAF	IAF and OAF	15	18	28.6503	25.4406	3.20975	1	4
PRG4	higher in NP and NP/IAF	NP and NP/IAF	IAF and OAF	15	18	36.6345	34.1754	2.45916	15	18
SERPINA4	higher in NP and NP/IAF	NP and NP/IAF	IAF and OAF	15	18	30.8139	28.605	2.20892	15	18
SERPIND1	higher in NP and NP/IAF	NP and NP/IAF	IAF and OAF	15	18	30.7598	28.7105	2.04927	15	18
SERPINF2	higher in NP and NP/IAF	NP and NP/IAF	IAF and OAF	15	18	30.2695	28.2248	2.04472	15	18
SFPQ	higher in NP and NP/IAF	NP and NP/IAF	IAF and OAF	15	18	30.1425	27.1523	2.99023	1	9
SHMT2	higher in NP and NP/IAF	NP and NP/IAF	IAF and OAF	15	18	26.3885	24.0385	2.35003	1	3
SNX9	higher in NP and NP/IAF	NP and NP/IAF	IAF and OAF	15	18	26.6223	24.234	2.38835	1	2
TNFAIP6	higher in NP and NP/IAF	NP and NP/IAF	IAF and OAF	15	18	30.9092	28.3256	2.5836	15	17
TOR1B	higher in NP and NP/IAF	NP and NP/IAF	IAF and OAF	15	18	27.1482	24.3358	2.81243	3	3
ACO2	higher in IAF and OAF	NP and NP/IAF	IAF and OAF	15	18	22.7027	25.5018	-2.79913	4	13
ACTN1	higher in IAF and OAF	NP and NP/IAF	IAF and OAF	15	18	24.4888	27.2122	-2.72343	11	18
ADSSL1	higher in IAF and OAF	NP and NP/IAF	IAF and OAF	15	18	22.7156	24.7385	-2.0229	1	1
AGL	higher in IAF and OAF	NP and NP/IAF	IAF and OAF	15	18	25.0489	29.3781	-4.32915	1	2
AK3	higher in IAF and OAF	NP and NP/IAF	IAF and OAF	15	18	24.9543	26.9879	-2.0336	2	3
AKR1A1	higher in IAF and OAF	NP and NP/IAF	IAF and OAF	15	18	24.858	27.1368	-2.27884	7	16
ALDH2	higher in IAF and OAF	NP and NP/IAF	IAF and OAF	15	18	23.3164	26.8328	-3.51644	1	5
ALDOA	higher in IAF and OAF	NP and NP/IAF	IAF and OAF	15	18	27.9085	29.9252	-2.01666	15	18
ALDOC	higher in IAF and OAF	NP and NP/IAF	IAF and OAF	15	18	25.9028	27.9188	-2.01598	5	14
ARHGAP1	higher in IAF and OAF	NP and NP/IAF	IAF and OAF	15	18	23.9679	26.5971	-2.62925	2	6
ARHGDIB	higher in IAF and OAF	NP and NP/IAF	IAF and OAF	15	18	23.0653	27.0952	-4.02987	1	11
ASPN	higher in IAF and OAF	NP and NP/IAF	IAF and OAF	15	18	29.6853	31.9215	-2.23623	15	18
ATP5D	higher in IAF and OAF	NP and NP/IAF	IAF and OAF	15	18	23.9788	26.8894	-2.91058	1	8
ATP5H	higher in IAF and OAF	NP and NP/IAF	IAF and OAF	15	18	23.7505	26.0931	-2.34261	1	8
BASP1	higher in IAF and OAF	NP and NP/IAF	IAF and OAF	15	18	24.949	27.95	-3.00097	1	7
CA3	higher in IAF and OAF	NP and NP/IAF	IAF and OAF	15	18	23.6457	29.0748	-5.42911	6	14
CALR	higher in IAF and OAF	NP and NP/IAF	IAF and OAF	15	18	26.3544	28.8351	-2.48069	13	18
CAP1	higher in IAF and OAF	NP and NP/IAF	IAF and OAF	15	18	25.0327	27.5896	-2.55694	12	17
CAPZA1	higher in IAF and OAF	NP and NP/IAF	IAF and OAF	15	18	24.7528	26.9589	-2.20601	5	13
CAPZA2	higher in IAF and OAF	NP and NP/IAF	IAF and OAF	15	18	24.8503	27.0644	-2.21407	2	14
CAPZB	higher in IAF and OAF	NP and NP/IAF	IAF and OAF	15	18	23.5951	26.7985	-3.20337	4	12
CBR1	higher in IAF and OAF	NP and NP/IAF	IAF and OAF	15	18	24.472	26.8464	-2.37436	5	14
CCT6A	higher in IAF and OAF	NP and NP/IAF	IAF and OAF	15	18	23.6181	26.5782	-2.96012	1	6
CD163	higher in IAF and OAF	NP and NP/IAF	IAF and OAF	15	18	23.6994	25.803	-2.10352	4	8
CD44	higher in IAF and OAF	NP and NP/IAF	IAF and OAF	15	18	24.3729	26.5189	-2.14603	3	9
CKM	higher in IAF and OAF	NP and NP/IAF	IAF and OAF	15	18	26.5037	29.2785	-2.77477	15	16
CKMT2	higher in IAF and OAF	NP and NP/IAF	IAF and OAF	15	18	21.3966	25.6948	-4.29822	2	5
CLTC	higher in IAF and OAF	NP and NP/IAF	IAF and OAF	15	18	23.592	26.6477	-3.05573	9	17
COL12A1	higher in IAF and OAF	NP and NP/IAF	IAF and OAF	15	18	29.4774	32.2467	-2.76931	15	18
COL14A1	higher in IAF and OAF	NP and NP/IAF	IAF and OAF	15	18	27.5085	30.5979	-3.08937	15	18
COL4A2	higher in IAF and OAF	NP and NP/IAF	IAF and OAF	15	18	25.0138	27.2625	-2.24869	3	12
CSTB	higher in IAF and OAF	NP and NP/IAF	IAF and OAF	15	18	23.586	26.8358	-3.24977	1	7
CTSG	higher in IAF and OAF	NP and NP/IAF	IAF and OAF	15	18	25.487	27.6865	-2.19949	1	11
DCTN2	higher in IAF and OAF	NP and NP/IAF	IAF and OAF	15	18	24.2196	26.6197	-2.40012	1	9
DMD	higher in IAF and OAF	NP and NP/IAF	IAF and OAF	15	18	24.0955	26.976	-2.88046	5	3
DNASE1L3	higher in IAF and OAF	NP and NP/IAF	IAF and OAF	15	18	23.269	25.5934	-2.3244	1	1
DPYSL2	higher in IAF and OAF	NP and NP/IAF	IAF and OAF	15	18	24.5188	27.4509	-2.93213	12	16
DPYSL3	higher in IAF and OAF	NP and NP/IAF	IAF and OAF	15	18	23.9964	26.9846	-2.9882	10	15
EHD2	higher in IAF and OAF	NP and NP/IAF	IAF and OAF	15	18	25.4717	27.5553	-2.08358	10	18
EIF2S1	higher in IAF and OAF	NP and NP/IAF	IAF and OAF	15	18	23.2992	26.0668	-2.76763	1	7
ENO3	higher in IAF and OAF	NP and NP/IAF	IAF and OAF	15	18	21.7791	26.4475	-4.6684	1	8
ESD	higher in IAF and OAF	NP and NP/IAF	IAF and OAF	15	18	24.2234	26.2634	-2.04008	3	12
FABP3	higher in IAF and OAF	NP and NP/IAF	IAF and OAF	15	18	25.894	28.3396	-2.44564	10	15
FABP4	higher in IAF and OAF	NP and NP/IAF	IAF and OAF	15	18	24.7629	29.1636	-4.40067	4	15
FABP5	higher in IAF and OAF	NP and NP/IAF	IAF and OAF	15	18	24.9974	27.0556	-2.05817	2	15
FAM184B	higher in IAF and OAF	NP and NP/IAF	IAF and OAF	15	18	23.2067	25.5157	-2.30898	1	5
FBLN2	higher in IAF and OAF	NP and NP/IAF	IAF and OAF	15	18	24.8634	26.9552	-2.09185	4	16
FH	higher in IAF and OAF	NP and NP/IAF	IAF and OAF	15	18	24.3522	26.6544	-2.30218	1	6
FHL1	higher in IAF and OAF	NP and NP/IAF	IAF and OAF	15	18	26.2597	29.1221	-2.8624	8	18
FLNB	higher in IAF and OAF	NP and NP/IAF	IAF and OAF	15	18	25.3351	27.8711	-2.53597	9	16
GLO1	higher in IAF and OAF	NP and NP/IAF	IAF and OAF	15	18	23.4263	25.4633	-2.03704	3	11
GLUD1	higher in IAF and OAF	NP and NP/IAF	IAF and OAF	15	18	23.3835	26.5751	-3.19158	3	12
GPD1	higher in IAF and OAF	NP and NP/IAF	IAF and OAF	15	18	24.5463	26.6825	-2.13623	5	6
HBA1	higher in IAF and OAF	NP and NP/IAF	IAF and OAF	15	18	31.6869	34.2875	-2.60064	15	18
HIST1H1B	higher in IAF and OAF	NP and NP/IAF	IAF and OAF	15	18	25.109	27.3025	-2.19343	3	10
HNRNPA2B1	higher in IAF and OAF	NP and NP/IAF	IAF and OAF	15	18	25.0197	27.375	-2.35534	6	17
HNRNPK	higher in IAF and OAF	NP and NP/IAF	IAF and OAF	15	18	24.0689	27.2321	-3.16318	3	16
HSPA9	higher in IAF and OAF	NP and NP/IAF	IAF and OAF	15	18	23.1653	26.4191	-3.25376	3	14
HSPB1	higher in IAF and OAF	NP and NP/IAF	IAF and OAF	15	18	25.153	28.9508	-3.7978	5	16
IDH2	higher in IAF and OAF	NP and NP/IAF	IAF and OAF	15	18	22.4447	25.3116	-2.86695	3	11
LAMA4	higher in IAF and OAF	NP and NP/IAF	IAF and OAF	15	18	24.0959	27.0786	-2.98274	13	14
LAMB1	higher in IAF and OAF	NP and NP/IAF	IAF and OAF	15	18	24.744	27.0854	-2.34146	10	14
LAMB2	higher in IAF and OAF	NP and NP/IAF	IAF and OAF	15	18	24.4916	26.7424	-2.25082	14	18
LAMC1	higher in IAF and OAF	NP and NP/IAF	IAF and OAF	15	18	25.2048	28.0163	-2.8115	15	18
LDB3	higher in IAF and OAF	NP and NP/IAF	IAF and OAF	15	18	23.6989	25.8406	-2.14166	4	5
LGALS1	higher in IAF and OAF	NP and NP/IAF	IAF and OAF	15	18	24.998	28.3941	-3.39609	7	15
MAMDC2	higher in IAF and OAF	NP and NP/IAF	IAF and OAF	15	18	24.8453	27.166	-2.32064	9	15
MB	higher in IAF and OAF	NP and NP/IAF	IAF and OAF	15	18	25.4069	29.6196	-4.21264	5	16
MDH2	higher in IAF and OAF	NP and NP/IAF	IAF and OAF	15	18	23.3287	27.2313	-3.90258	3	13
MPO	higher in IAF and OAF	NP and NP/IAF	IAF and OAF	15	18	24.4836	27.2093	-2.72574	5	15
MYBPC2	higher in IAF and OAF	NP and NP/IAF	IAF and OAF	15	18	22.3846	25.0011	-2.61654	4	11
MYH1	higher in IAF and OAF	NP and NP/IAF	IAF and OAF	15	18	23.7697	26.9361	-3.16639	15	18
MYH10	higher in IAF and OAF	NP and NP/IAF	IAF and OAF	15	18	24.7897	26.941	-2.15133	8	14
MYH11	higher in IAF and OAF	NP and NP/IAF	IAF and OAF	15	18	23.4215	26.0972	-2.67564	14	16
MYH4	higher in IAF and OAF	NP and NP/IAF	IAF and OAF	15	18	24.7799	27.4044	-2.62448	4	6
MYL1	higher in IAF and OAF	NP and NP/IAF	IAF and OAF	15	18	24.8433	26.9847	-2.14146	11	17
MYL12A	higher in IAF and OAF	NP and NP/IAF	IAF and OAF	15	18	23.7766	26.4637	-2.68711	7	13
MYL3	higher in IAF and OAF	NP and NP/IAF	IAF and OAF	15	18	24.5723	27.2288	-2.65647	6	12
MYL6	higher in IAF and OAF	NP and NP/IAF	IAF and OAF	15	18	25.1538	27.6061	-2.45226	3	16
MYL6B	higher in IAF and OAF	NP and NP/IAF	IAF and OAF	15	18	23.8141	26.9761	-3.16205	8	13
MYLPF	higher in IAF and OAF	NP and NP/IAF	IAF and OAF	15	18	23.5946	27.0299	-3.43533	8	10
MYOM1	higher in IAF and OAF	NP and NP/IAF	IAF and OAF	15	18	21.8274	25.5561	-3.72863	5	6
MYOZ1	higher in IAF and OAF	NP and NP/IAF	IAF and OAF	15	18	24.04	27.2422	-3.20217	3	3
NID1	higher in IAF and OAF	NP and NP/IAF	IAF and OAF	15	18	25.1481	27.222	-2.07395	12	15
NME2	higher in IAF and OAF	NP and NP/IAF	IAF and OAF	15	18	24.0052	26.2301	-2.22486	4	13
OGDH	higher in IAF and OAF	NP and NP/IAF	IAF and OAF	15	18	23.9259	26.2959	-2.37002	1	6
PDLIM5	higher in IAF and OAF	NP and NP/IAF	IAF and OAF	15	18	23.9	26.7542	-2.85425	1	4
PFN1	higher in IAF and OAF	NP and NP/IAF	IAF and OAF	15	18	26.4008	28.6238	-2.22298	11	18
PLEC	higher in IAF and OAF	NP and NP/IAF	IAF and OAF	15	18	25.4363	28.6125	-3.1762	15	18
PLIN3	higher in IAF and OAF	NP and NP/IAF	IAF and OAF	15	18	23.8045	26.897	-3.09254	1	7
PLS3	higher in IAF and OAF	NP and NP/IAF	IAF and OAF	15	18	25.2611	27.5553	-2.29417	15	18
PTN	higher in IAF and OAF	NP and NP/IAF	IAF and OAF	15	18	26.624	28.7099	-2.08598	6	17
RAN	higher in IAF and OAF	NP and NP/IAF	IAF and OAF	15	18	24.4013	26.8344	-2.43305	3	15
RPL10	higher in IAF and OAF	NP and NP/IAF	IAF and OAF	15	18	23.7197	26.5438	-2.82415	1	4
RPL12	higher in IAF and OAF	NP and NP/IAF	IAF and OAF	15	18	24.0147	26.2399	-2.22526	3	14
RPL3	higher in IAF and OAF	NP and NP/IAF	IAF and OAF	15	18	24.2913	26.5443	-2.25297	2	12
RPL31	higher in IAF and OAF	NP and NP/IAF	IAF and OAF	15	18	24.0916	26.2868	-2.19524	2	7
RPL4	higher in IAF and OAF	NP and NP/IAF	IAF and OAF	15	18	24.3887	26.5576	-2.16893	2	13
RPLP2	higher in IAF and OAF	NP and NP/IAF	IAF and OAF	15	18	24.7941	27.3334	-2.53937	4	16
RPN2	higher in IAF and OAF	NP and NP/IAF	IAF and OAF	15	18	23.6742	25.6928	-2.01861	2	10
RPS11	higher in IAF and OAF	NP and NP/IAF	IAF and OAF	15	18	23.4758	26.2466	-2.77082	1	5
RPS16	higher in IAF and OAF	NP and NP/IAF	IAF and OAF	15	18	25.2838	27.3364	-2.05262	2	10
RPS18	higher in IAF and OAF	NP and NP/IAF	IAF and OAF	15	18	24.7371	26.993	-2.25588	3	12
RPS20	higher in IAF and OAF	NP and NP/IAF	IAF and OAF	15	18	23.883	26.5631	-2.68006	1	7
RPS26	higher in IAF and OAF	NP and NP/IAF	IAF and OAF	15	18	23.6699	26.3758	-2.70595	1	4
RPS3	higher in IAF and OAF	NP and NP/IAF	IAF and OAF	15	18	24.9185	27.4593	-2.54078	4	17
RPS9	higher in IAF and OAF	NP and NP/IAF	IAF and OAF	15	18	24.4383	26.8042	-2.3659	3	11
RRBP1	higher in IAF and OAF	NP and NP/IAF	IAF and OAF	15	18	24.5605	26.8792	-2.31863	12	15
SELENBP1	higher in IAF and OAF	NP and NP/IAF	IAF and OAF	15	18	24.3099	26.6535	-2.34365	7	16
SERPINB1	higher in IAF and OAF	NP and NP/IAF	IAF and OAF	15	18	24.2896	26.5463	-2.2567	5	14
SERPINH1	higher in IAF and OAF	NP and NP/IAF	IAF and OAF	15	18	24.5731	27.6727	-3.09958	12	15
SET	higher in IAF and OAF	NP and NP/IAF	IAF and OAF	15	18	25.9599	28.0204	-2.06046	2	11
SH3BGRL3	higher in IAF and OAF	NP and NP/IAF	IAF and OAF	15	18	23.6109	26.0315	-2.42065	1	12
SLC25A4	higher in IAF and OAF	NP and NP/IAF	IAF and OAF	15	18	23.0432	25.9426	-2.89944	1	5
SOD1	higher in IAF and OAF	NP and NP/IAF	IAF and OAF	15	18	25.9941	28.5564	-2.56232	10	17
SOD2	higher in IAF and OAF	NP and NP/IAF	IAF and OAF	15	18	24.7711	27.8104	-3.03933	7	16
SPON1	higher in IAF and OAF	NP and NP/IAF	IAF and OAF	15	18	23.4688	26.7462	-3.27738	4	15
SPTAN1	higher in IAF and OAF	NP and NP/IAF	IAF and OAF	15	18	25.1669	27.2248	-2.05783	14	18
SRSF7	higher in IAF and OAF	NP and NP/IAF	IAF and OAF	15	18	24.8467	27.2679	-2.42119	1	7
ST13	higher in IAF and OAF	NP and NP/IAF	IAF and OAF	15	18	24.2686	27.2385	-2.96985	1	10
STIP1	higher in IAF and OAF	NP and NP/IAF	IAF and OAF	15	18	23.8453	26.9895	-3.14417	2	6
TAGLN	higher in IAF and OAF	NP and NP/IAF	IAF and OAF	15	18	25.8858	28.1059	-2.22014	9	15
TAGLN2	higher in IAF and OAF	NP and NP/IAF	IAF and OAF	15	18	26.6488	28.7543	-2.10549	10	15
TLN1	higher in IAF and OAF	NP and NP/IAF	IAF and OAF	15	18	23.9043	26.889	-2.98471	9	17
TNC	higher in IAF and OAF	NP and NP/IAF	IAF and OAF	15	18	31.3784	33.6616	-2.28318	15	18
TNNC1	higher in IAF and OAF	NP and NP/IAF	IAF and OAF	15	18	24.6612	27.0138	-2.35257	3	12
TNNC2	higher in IAF and OAF	NP and NP/IAF	IAF and OAF	15	18	22.4044	26.2043	-3.79995	5	11
TNNI1	higher in IAF and OAF	NP and NP/IAF	IAF and OAF	15	18	24.3924	27.8356	-3.44329	2	5
TNNI2	higher in IAF and OAF	NP and NP/IAF	IAF and OAF	15	18	24.5116	29.2503	-4.7387	1	3
TNNT1	higher in IAF and OAF	NP and NP/IAF	IAF and OAF	15	18	22.834	27.2565	-4.42251	4	6
TNNT3	higher in IAF and OAF	NP and NP/IAF	IAF and OAF	15	18	21.8844	25.4338	-3.54939	8	15
TNXB	higher in IAF and OAF	NP and NP/IAF	IAF and OAF	15	18	27.9695	30.5036	-2.53407	15	18
TPM1	higher in IAF and OAF	NP and NP/IAF	IAF and OAF	15	18	24.8418	27.7444	-2.90252	6	16
TPM2	higher in IAF and OAF	NP and NP/IAF	IAF and OAF	15	18	26.293	28.9089	-2.61589	7	16
TPM4	higher in IAF and OAF	NP and NP/IAF	IAF and OAF	15	18	25.4509	28.4646	-3.01367	1	12
TPSAB1	higher in IAF and OAF	NP and NP/IAF	IAF and OAF	15	18	24.0741	27.2272	-3.15309	3	9
TPT1	higher in IAF and OAF	NP and NP/IAF	IAF and OAF	15	18	22.5425	25.5895	-3.04703	3	11
TUBB	higher in IAF and OAF	NP and NP/IAF	IAF and OAF	15	18	23.1436	27.0933	-3.94967	1	12
TXN	higher in IAF and OAF	NP and NP/IAF	IAF and OAF	15	18	24.2673	26.9903	-2.72302	2	14
UBA1	higher in IAF and OAF	NP and NP/IAF	IAF and OAF	15	18	25.2107	27.6128	-2.40202	7	17
UQCRC1	higher in IAF and OAF	NP and NP/IAF	IAF and OAF	15	18	22.7637	26.6442	-3.88048	1	6
VCL	higher in IAF and OAF	NP and NP/IAF	IAF and OAF	15	18	25.6778	28.0742	-2.39632	14	17
VDAC1	higher in IAF and OAF	NP and NP/IAF	IAF and OAF	15	18	23.9759	26.4393	-2.46341	3	11

## Sheet: Sheet5
gene	status	group1	group2	Num of samples in group1	Num of samples in group2	Num of valid values in group1	Num of valid values in group2
SEPT7	exclusive in IAF and OAF	NP and NP/IAF	IAF and OAF	15	18	0	11
AHCY	exclusive in IAF and OAF	NP and NP/IAF	IAF and OAF	15	18	0	10
ASAH1	exclusive in IAF and OAF	NP and NP/IAF	IAF and OAF	15	18	0	10
ENPP1	exclusive in IAF and OAF	NP and NP/IAF	IAF and OAF	15	18	0	13
H1FX	exclusive in IAF and OAF	NP and NP/IAF	IAF and OAF	15	18	0	11
HNRNPA3	exclusive in IAF and OAF	NP and NP/IAF	IAF and OAF	15	18	0	12
HNRNPD	exclusive in IAF and OAF	NP and NP/IAF	IAF and OAF	15	18	0	12
MDK	exclusive in IAF and OAF	NP and NP/IAF	IAF and OAF	15	18	0	14
MIF	exclusive in IAF and OAF	NP and NP/IAF	IAF and OAF	15	18	0	12
MYO1C	exclusive in IAF and OAF	NP and NP/IAF	IAF and OAF	15	18	0	13
NSFL1C	exclusive in IAF and OAF	NP and NP/IAF	IAF and OAF	15	18	0	10
OLFML3	exclusive in IAF and OAF	NP and NP/IAF	IAF and OAF	15	18	0	10
PLCD1	exclusive in IAF and OAF	NP and NP/IAF	IAF and OAF	15	18	0	12
PRTN3	exclusive in IAF and OAF	NP and NP/IAF	IAF and OAF	15	18	0	11
RPL9	exclusive in IAF and OAF	NP and NP/IAF	IAF and OAF	15	18	0	12
RPS5	exclusive in IAF and OAF	NP and NP/IAF	IAF and OAF	15	18	0	10
RRAS	exclusive in IAF and OAF	NP and NP/IAF	IAF and OAF	15	18	0	11
S100A8	exclusive in IAF and OAF	NP and NP/IAF	IAF and OAF	15	18	0	16
SH3BGRL	exclusive in IAF and OAF	NP and NP/IAF	IAF and OAF	15	18	0	10
SRPX	exclusive in IAF and OAF	NP and NP/IAF	IAF and OAF	15	18	0	12
TPPP3	exclusive in IAF and OAF	NP and NP/IAF	IAF and OAF	15	18	0	12

## Sheet: Sheet6
gene	status	group1	group2	Num of samples in group1	Num of samples in group2	average log2(LFQ) in group1	average log2(LFQ) in group2	log2(Fold change)	Num of valid values in group1	Num of valid values in group2	p-value
A2M	higher in NP and NP/IAF	NP and NP/IAF	IAF and OAF	15	18	35.9078	33.8393	2.06848	15	18	4.83378e-08
ACTG1	higher in IAF and OAF	NP and NP/IAF	IAF and OAF	15	18	30.4835	32.3005	-1.81702	15	18	9.14631e-06
ACTN4	higher in IAF and OAF	NP and NP/IAF	IAF and OAF	15	18	26.2271	28.9786	-2.75148	12	18	1.32471e-05
AHNAK	higher in IAF and OAF	NP and NP/IAF	IAF and OAF	15	18	26.4474	30.8767	-4.42929	15	18	1.53069e-07
ANXA1	higher in IAF and OAF	NP and NP/IAF	IAF and OAF	15	18	30.4946	31.9544	-1.4598	15	18	1.46435e-06
ANXA2	higher in IAF and OAF	NP and NP/IAF	IAF and OAF	15	18	30.8852	32.8369	-1.95166	15	18	2.78827e-06
ANXA4	higher in IAF and OAF	NP and NP/IAF	IAF and OAF	15	18	28.3774	30.4668	-2.0894	15	18	5.15237e-06
ANXA5	higher in IAF and OAF	NP and NP/IAF	IAF and OAF	15	18	30.699	31.8118	-1.11284	15	18	1.99377e-05
ANXA6	higher in IAF and OAF	NP and NP/IAF	IAF and OAF	15	18	27.5652	29.6735	-2.1083	15	18	1.07384e-06
ATP5A1	higher in IAF and OAF	NP and NP/IAF	IAF and OAF	15	18	24.6825	28.5533	-3.87079	14	17	1.30915e-06
ATP5B	higher in IAF and OAF	NP and NP/IAF	IAF and OAF	15	18	24.774	28.8322	-4.0582	14	17	1.82248e-06
ATRN	higher in NP and NP/IAF	NP and NP/IAF	IAF and OAF	15	18	27.611	26.0335	1.57748	14	12	6.61667e-05
BGN	higher in IAF and OAF	NP and NP/IAF	IAF and OAF	15	18	35.5762	37.0415	-1.46526	15	18	3.47046e-05
BLVRB	higher in IAF and OAF	NP and NP/IAF	IAF and OAF	15	18	25.4064	27.8072	-2.4008	11	17	1.28393e-05
CA1	higher in IAF and OAF	NP and NP/IAF	IAF and OAF	15	18	25.1913	28.9384	-3.74714	12	17	1.00215e-05
CAT	higher in IAF and OAF	NP and NP/IAF	IAF and OAF	15	18	24.8995	28.0574	-3.15791	12	16	4.71944e-05
CD5L	higher in NP and NP/IAF	NP and NP/IAF	IAF and OAF	15	18	30.22	27.6564	2.56362	10	17	9.89659e-05
CFD	higher in IAF and OAF	NP and NP/IAF	IAF and OAF	15	18	28.6739	29.649	-0.9751	15	18	6.58312e-05
CFL1	higher in IAF and OAF	NP and NP/IAF	IAF and OAF	15	18	26.1774	29.2163	-3.03894	13	17	6.68684e-07
CHI3L2	higher in NP and NP/IAF	NP and NP/IAF	IAF and OAF	15	18	28.2113	26.246	1.96528	15	12	5.68027e-06
COL1A1	higher in IAF and OAF	NP and NP/IAF	IAF and OAF	15	18	31.6557	33.7284	-2.0727	15	18	1.01037e-06
COL6A1	higher in IAF and OAF	NP and NP/IAF	IAF and OAF	15	18	33.5443	35.4489	-1.90463	15	18	2.76021e-06
COL6A2	higher in IAF and OAF	NP and NP/IAF	IAF and OAF	15	18	32.5288	34.5758	-2.04697	15	18	3.50502e-07
COL6A3	higher in IAF and OAF	NP and NP/IAF	IAF and OAF	15	18	34.9466	36.7216	-1.77501	15	18	4.16707e-06
CRTAC1	higher in NP and NP/IAF	NP and NP/IAF	IAF and OAF	15	18	31.4345	30.2331	1.20147	15	18	2.20623e-07
CTSB	higher in IAF and OAF	NP and NP/IAF	IAF and OAF	15	18	25.884	28.0482	-2.16425	12	17	5.08465e-05
CTSD	higher in IAF and OAF	NP and NP/IAF	IAF and OAF	15	18	27.7912	29.3238	-1.53259	15	18	3.12961e-05
ECM1	higher in NP and NP/IAF	NP and NP/IAF	IAF and OAF	15	18	30.7583	29.5834	1.1749	15	18	3.6901e-05
EEF1A1	higher in IAF and OAF	NP and NP/IAF	IAF and OAF	15	18	27.9936	29.6203	-1.6267	15	18	7.70773e-06
ENO1	higher in IAF and OAF	NP and NP/IAF	IAF and OAF	15	18	32.0034	33.1338	-1.13038	15	18	1.89629e-06
FBN1	higher in IAF and OAF	NP and NP/IAF	IAF and OAF	15	18	29.3738	30.912	-1.5382	15	18	1.73806e-05
FLNA	higher in IAF and OAF	NP and NP/IAF	IAF and OAF	15	18	25.4188	29.2892	-3.87042	14	18	3.1383e-05
FMOD	higher in IAF and OAF	NP and NP/IAF	IAF and OAF	15	18	35.0229	36.2863	-1.26342	15	18	5.65517e-05
FSCN1	higher in IAF and OAF	NP and NP/IAF	IAF and OAF	15	18	24.441	26.8846	-2.44361	8	18	5.58214e-05
GAPDH	higher in IAF and OAF	NP and NP/IAF	IAF and OAF	15	18	30.9082	32.2852	-1.37693	15	18	8.82492e-05
GPI	higher in IAF and OAF	NP and NP/IAF	IAF and OAF	15	18	25.7369	27.5916	-1.85469	13	16	8.90401e-06
GSTP1	higher in IAF and OAF	NP and NP/IAF	IAF and OAF	15	18	27.3253	29.1378	-1.81247	14	18	2.50368e-07
HBB	higher in IAF and OAF	NP and NP/IAF	IAF and OAF	15	18	33.2586	35.6875	-2.42892	15	18	5.78254e-05
HBD	higher in IAF and OAF	NP and NP/IAF	IAF and OAF	15	18	28.193	30.6267	-2.43371	14	18	1.08942e-05
HIST1H1C	higher in IAF and OAF	NP and NP/IAF	IAF and OAF	15	18	27.8944	30.3869	-2.49242	12	18	5.65815e-06
HIST1H2BL	higher in IAF and OAF	NP and NP/IAF	IAF and OAF	15	18	29.1107	31.3853	-2.27461	15	18	5.2412e-06
HIST1H4A	higher in IAF and OAF	NP and NP/IAF	IAF and OAF	15	18	29.3799	31.1752	-1.79531	15	18	7.12761e-05
HIST2H2AC	higher in IAF and OAF	NP and NP/IAF	IAF and OAF	15	18	27.0466	29.7284	-2.68176	15	18	1.71866e-07
HSP90AA1	higher in IAF and OAF	NP and NP/IAF	IAF and OAF	15	18	27.6023	29.7416	-2.13929	15	18	3.51137e-05
HSP90AB1	higher in IAF and OAF	NP and NP/IAF	IAF and OAF	15	18	25.2139	27.9251	-2.71118	11	18	1.39502e-06
HSP90B1	higher in IAF and OAF	NP and NP/IAF	IAF and OAF	15	18	28.8875	30.1464	-1.25894	15	18	4.53698e-05
HSPA1B	higher in IAF and OAF	NP and NP/IAF	IAF and OAF	15	18	27.0484	30.0713	-3.02295	15	18	4.32462e-07
HSPA8	higher in IAF and OAF	NP and NP/IAF	IAF and OAF	15	18	27.669	29.8505	-2.18157	15	18	1.69226e-05
HSPG2	higher in IAF and OAF	NP and NP/IAF	IAF and OAF	15	18	33.067	33.7221	-0.655069	15	18	4.52724e-05
IQGAP1	higher in IAF and OAF	NP and NP/IAF	IAF and OAF	15	18	26.9342	30.0056	-3.07142	15	17	1.50256e-07
LMNA	higher in IAF and OAF	NP and NP/IAF	IAF and OAF	15	18	28.5689	31.6121	-3.0432	15	18	2.4334e-05
LOX	higher in IAF and OAF	NP and NP/IAF	IAF and OAF	15	18	26.9298	28.8855	-1.9557	14	18	4.20642e-06
MATN2	higher in IAF and OAF	NP and NP/IAF	IAF and OAF	15	18	28.6854	30.1486	-1.46314	15	18	5.55807e-05
MYH9	higher in IAF and OAF	NP and NP/IAF	IAF and OAF	15	18	24.4068	29.4218	-5.01503	15	18	9.36236e-07
P4HB	higher in IAF and OAF	NP and NP/IAF	IAF and OAF	15	18	28.7482	29.9888	-1.24056	15	18	6.37596e-05
PARK7	higher in IAF and OAF	NP and NP/IAF	IAF and OAF	15	18	25.8439	28.2172	-2.3733	9	17	3.55426e-05
PEBP1	higher in IAF and OAF	NP and NP/IAF	IAF and OAF	15	18	27.2405	29.4987	-2.2582	15	17	2.75883e-06
PGK1	higher in IAF and OAF	NP and NP/IAF	IAF and OAF	15	18	30.6307	31.9283	-1.29757	15	18	8.57014e-06
PKM	higher in IAF and OAF	NP and NP/IAF	IAF and OAF	15	18	30.5856	32.2309	-1.6453	15	18	6.91646e-08
PPIA	higher in IAF and OAF	NP and NP/IAF	IAF and OAF	15	18	28.2701	30.3126	-2.0425	15	18	5.8228e-07
PRDX1	higher in IAF and OAF	NP and NP/IAF	IAF and OAF	15	18	28.5585	29.7347	-1.17618	15	18	8.81569e-05
PRDX2	higher in IAF and OAF	NP and NP/IAF	IAF and OAF	15	18	26.6869	28.7842	-2.09736	14	17	1.06904e-06
PRELP	higher in IAF and OAF	NP and NP/IAF	IAF and OAF	15	18	36.175	37.4632	-1.28822	15	18	6.31996e-06
PTRF	higher in IAF and OAF	NP and NP/IAF	IAF and OAF	15	18	25.9249	28.6988	-2.77393	11	16	3.73221e-05
RBP4	higher in NP and NP/IAF	NP and NP/IAF	IAF and OAF	15	18	29.9848	28.5717	1.41308	15	18	1.67426e-05
RNH1	higher in IAF and OAF	NP and NP/IAF	IAF and OAF	15	18	24.5537	27.4522	-2.89851	10	17	1.94194e-05
RPS27A	higher in IAF and OAF	NP and NP/IAF	IAF and OAF	15	18	26.6898	28.2294	-1.5396	12	16	6.95718e-05
RPS8	higher in IAF and OAF	NP and NP/IAF	IAF and OAF	15	18	24.5563	26.9604	-2.40414	9	17	7.40598e-05
S100A4	higher in IAF and OAF	NP and NP/IAF	IAF and OAF	15	18	27.5886	28.7771	-1.1885	14	17	2.19734e-05
S100A9	higher in IAF and OAF	NP and NP/IAF	IAF and OAF	15	18	24.7653	28.1749	-3.40958	10	16	1.95288e-06
SERPINE1	higher in NP and NP/IAF	NP and NP/IAF	IAF and OAF	15	18	29.5244	27.4424	2.08201	15	17	8.77442e-05
SERPING1	higher in NP and NP/IAF	NP and NP/IAF	IAF and OAF	15	18	32.3098	30.9109	1.39892	15	18	1.44014e-05
THBS1	higher in IAF and OAF	NP and NP/IAF	IAF and OAF	15	18	31.6979	34.6551	-2.95715	15	18	4.2822e-06
THBS4	higher in IAF and OAF	NP and NP/IAF	IAF and OAF	15	18	28.8635	30.6854	-1.82187	15	18	7.45663e-06
TKT	higher in IAF and OAF	NP and NP/IAF	IAF and OAF	15	18	24.893	27.5597	-2.66666	12	17	9.70506e-08
TPI1	higher in IAF and OAF	NP and NP/IAF	IAF and OAF	15	18	29.4427	30.983	-1.54034	15	18	5.61505e-06
TPM3	higher in IAF and OAF	NP and NP/IAF	IAF and OAF	15	18	26.7453	30.0818	-3.33657	15	17	6.1e-05
TUBA1B	higher in IAF and OAF	NP and NP/IAF	IAF and OAF	15	18	26.6324	29.0112	-2.37879	15	18	1.53265e-06
TUBB4B	higher in IAF and OAF	NP and NP/IAF	IAF and OAF	15	18	26.8779	29.5855	-2.70755	14	18	1.68243e-05
VCP	higher in IAF and OAF	NP and NP/IAF	IAF and OAF	15	18	24.616	28.0558	-3.4398	13	17	7.17543e-06
VIM	higher in IAF and OAF	NP and NP/IAF	IAF and OAF	15	18	31.745	34.3176	-2.57262	15	18	6.10754e-06
YWHAE	higher in IAF and OAF	NP and NP/IAF	IAF and OAF	15	18	27.6155	29.103	-1.48748	15	18	5.66817e-06
YWHAZ	higher in IAF and OAF	NP and NP/IAF	IAF and OAF	15	18	28.1769	29.4925	-1.31565	15	17	4.54258e-05

## Sheet: Sheet7
gene	status	group1	group2	Num of samples in group1	Num of samples in group2	average log2(LFQ) in group1	average log2(LFQ) in group2	log2(Fold change)	Num of valid values in group1	Num of valid values in group2
SEPT7	higher in NP, NP/IAF and OAF	NP, NP/IAF and OAF	IAF	27	6	27.3655	24.5365	2.829	9	2
ACADVL	higher in NP, NP/IAF and OAF	NP, NP/IAF and OAF	IAF	27	6	26.69165	24.6819	2.00975	16	2
ACO2	higher in NP, NP/IAF and OAF	NP, NP/IAF and OAF	IAF	27	6	25.2153142857143	23.1065666666667	2.10874761904762	14	3
ACTN3	higher in NP, NP/IAF and OAF	NP, NP/IAF and OAF	IAF	27	6	26.23491	23.6424333333333	2.59247666666667	20	3
ADH5	higher in NP, NP/IAF and OAF	NP, NP/IAF and OAF	IAF	27	6	27.1028785714286	24.5216666666667	2.5812119047619	14	3
ANKRD2	higher in NP, NP/IAF and OAF	NP, NP/IAF and OAF	IAF	27	6	28.1607666666667	25.32	2.84076666666667	3	1
ANP32A	higher in NP, NP/IAF and OAF	NP, NP/IAF and OAF	IAF	27	6	27.3208666666667	24.5824	2.73846666666667	6	1
AOC3	higher in NP, NP/IAF and OAF	NP, NP/IAF and OAF	IAF	27	6	26.80834	23.2751	3.53324	5	1
AP1B1	higher in NP, NP/IAF and OAF	NP, NP/IAF and OAF	IAF	27	6	26.0866181818182	24.0241	2.06251818181818	11	1
APOB	higher in NP, NP/IAF and OAF	NP, NP/IAF and OAF	IAF	27	6	31.8759666666667	29.8072166666667	2.06875	27	6
ARHGAP1	higher in NP, NP/IAF and OAF	NP, NP/IAF and OAF	IAF	27	6	26.3131571428571	23.3266	2.98655714285714	7	1
ARHGDIB	higher in NP, NP/IAF and OAF	NP, NP/IAF and OAF	IAF	27	6	27.1785	24.6636	2.5149	10	2
ARPC1B	higher in NP, NP/IAF and OAF	NP, NP/IAF and OAF	IAF	27	6	26.8722666666667	24.4517	2.42056666666667	6	1
ATP5H	higher in NP, NP/IAF and OAF	NP, NP/IAF and OAF	IAF	27	6	26.055275	24.0532	2.002075	8	1
CA2	higher in NP, NP/IAF and OAF	NP, NP/IAF and OAF	IAF	27	6	27.682	24.7655	2.9165	19	1
CA3	higher in NP, NP/IAF and OAF	NP, NP/IAF and OAF	IAF	27	6	27.89476875	25.651225	2.24354375	16	4
CANX	higher in NP, NP/IAF and OAF	NP, NP/IAF and OAF	IAF	27	6	26.8101692307692	23.209	3.60116923076923	13	1
CAPN1	higher in NP, NP/IAF and OAF	NP, NP/IAF and OAF	IAF	27	6	26.574	23.1286	3.4454	5	1
CAPZA1	higher in NP, NP/IAF and OAF	NP, NP/IAF and OAF	IAF	27	6	26.60731875	24.2561	2.35121875	16	2
CAPZA2	higher in NP, NP/IAF and OAF	NP, NP/IAF and OAF	IAF	27	6	27.2250230769231	24.8924333333333	2.33258974358974	13	3
CD163	higher in NP, NP/IAF and OAF	NP, NP/IAF and OAF	IAF	27	6	25.3097909090909	22.8139	2.49589090909091	11	1
CFL2	higher in NP, NP/IAF and OAF	NP, NP/IAF and OAF	IAF	27	6	26.9343166666667	23.7344	3.19991666666667	6	1
CKMT2	higher in NP, NP/IAF and OAF	NP, NP/IAF and OAF	IAF	27	6	25.1287	22.8119	2.3168	5	2
CNDP2	higher in NP, NP/IAF and OAF	NP, NP/IAF and OAF	IAF	27	6	26.1573769230769	23.2338	2.92357692307693	13	1
CNN1	higher in NP, NP/IAF and OAF	NP, NP/IAF and OAF	IAF	27	6	27.9175571428571	25.7009	2.21665714285714	7	1
COL4A1	higher in NP, NP/IAF and OAF	NP, NP/IAF and OAF	IAF	27	6	27.211725	24.4634	2.748325	8	1
COPB2	higher in NP, NP/IAF and OAF	NP, NP/IAF and OAF	IAF	27	6	25.7048428571429	23.3961	2.30874285714286	7	1
CYB5R3	higher in NP, NP/IAF and OAF	NP, NP/IAF and OAF	IAF	27	6	26.8984	24.6189	2.2795	10	2
DYNC1H1	higher in NP, NP/IAF and OAF	NP, NP/IAF and OAF	IAF	27	6	26.8582823529412	24.5999	2.25838235294118	17	2
EEF1A2	higher in NP, NP/IAF and OAF	NP, NP/IAF and OAF	IAF	27	6	28.1257	25.9665	2.1592	2	1
EIF2S1	higher in NP, NP/IAF and OAF	NP, NP/IAF and OAF	IAF	27	6	26.39765	23.69055	2.7071	6	2
EIF5A	higher in NP, NP/IAF and OAF	NP, NP/IAF and OAF	IAF	27	6	26.4584454545455	24.2806666666667	2.17777878787879	11	3
ENO3	higher in NP, NP/IAF and OAF	NP, NP/IAF and OAF	IAF	27	6	26.9499333333333	23.8865	3.06343333333333	6	3
ESD	higher in NP, NP/IAF and OAF	NP, NP/IAF and OAF	IAF	27	6	26.1344769230769	24.04165	2.09282692307692	13	2
FABP5	higher in NP, NP/IAF and OAF	NP, NP/IAF and OAF	IAF	27	6	27.3355923076923	25.116425	2.21916730769231	13	4
GLUD1	higher in NP, NP/IAF and OAF	NP, NP/IAF and OAF	IAF	27	6	26.4952666666667	23.7026	2.79266666666667	12	3
GPD1	higher in NP, NP/IAF and OAF	NP, NP/IAF and OAF	IAF	27	6	25.96499	23.177	2.78799	10	1
HADHB	higher in NP, NP/IAF and OAF	NP, NP/IAF and OAF	IAF	27	6	26.87006	23.1933	3.67676	10	1
HDGF	higher in NP, NP/IAF and OAF	NP, NP/IAF and OAF	IAF	27	6	26.7500615384615	23.5672	3.18286153846154	13	3
HDLBP	higher in NP, NP/IAF and OAF	NP, NP/IAF and OAF	IAF	27	6	25.5013	23.3648	2.1365	6	1
HINT1	higher in NP, NP/IAF and OAF	NP, NP/IAF and OAF	IAF	27	6	26.72442	24.3296	2.39482	5	1
HLA-DRB1	higher in NP, NP/IAF and OAF	NP, NP/IAF and OAF	IAF	27	6	26.8959125	24.8944	2.0015125	8	2
HNRNPA3	higher in NP, NP/IAF and OAF	NP, NP/IAF and OAF	IAF	27	6	27.4611	24.94335	2.51775	10	2
HNRNPL	higher in NP, NP/IAF and OAF	NP, NP/IAF and OAF	IAF	27	6	25.95562	22.8677	3.08792	5	1
HNRNPU	higher in NP, NP/IAF and OAF	NP, NP/IAF and OAF	IAF	27	6	27.02025	23.0347	3.98555	8	1
HSD17B10	higher in NP, NP/IAF and OAF	NP, NP/IAF and OAF	IAF	27	6	26.118775	23.3644	2.754375	4	1
HSPA2	higher in NP, NP/IAF and OAF	NP, NP/IAF and OAF	IAF	27	6	27.9007	25.67405	2.22665	9	2
KLHL41	higher in NP, NP/IAF and OAF	NP, NP/IAF and OAF	IAF	27	6	26.46895	22.72265	3.7463	4	2
LCP1	higher in NP, NP/IAF and OAF	NP, NP/IAF and OAF	IAF	27	6	26.846468	24.4526666666667	2.39380133333334	25	3
LDB3	higher in NP, NP/IAF and OAF	NP, NP/IAF and OAF	IAF	27	6	25.153975	22.7668	2.387175	8	1
LRRC59	higher in NP, NP/IAF and OAF	NP, NP/IAF and OAF	IAF	27	6	25.3478166666667	23.1677	2.18011666666667	6	1
MYDGF	higher in NP, NP/IAF and OAF	NP, NP/IAF and OAF	IAF	27	6	24.61392	22.5549	2.05902	5	1
MYH7	higher in NP, NP/IAF and OAF	NP, NP/IAF and OAF	IAF	27	6	29.8334592592593	27.4520666666667	2.38139259259259	27	6
MYL12A	higher in NP, NP/IAF and OAF	NP, NP/IAF and OAF	IAF	27	6	25.9575166666667	21.6147	4.34281666666667	18	2
MYL2	higher in NP, NP/IAF and OAF	NP, NP/IAF and OAF	IAF	27	6	26.9062	24.5795333333333	2.32666666666667	17	3
MYL6	higher in NP, NP/IAF and OAF	NP, NP/IAF and OAF	IAF	27	6	27.6795866666667	25.4913	2.18828666666666	15	4
MYLPF	higher in NP, NP/IAF and OAF	NP, NP/IAF and OAF	IAF	27	6	25.7401125	23.6067	2.1334125	16	2
MYOC	higher in NP, NP/IAF and OAF	NP, NP/IAF and OAF	IAF	27	6	25.275325	22.83435	2.440975	20	4
MYOF	higher in NP, NP/IAF and OAF	NP, NP/IAF and OAF	IAF	27	6	27.6618	25.14945	2.51235	11	2
MYOM1	higher in NP, NP/IAF and OAF	NP, NP/IAF and OAF	IAF	27	6	24.3239777777778	21.7789	2.54507777777778	9	2
NAP1L1	higher in NP, NP/IAF and OAF	NP, NP/IAF and OAF	IAF	27	6	26.0774833333333	23.908	2.16948333333333	6	1
OLFML1	higher in NP, NP/IAF and OAF	NP, NP/IAF and OAF	IAF	27	6	27.1474636363636	23.4678	3.67966363636364	11	2
PAICS	higher in NP, NP/IAF and OAF	NP, NP/IAF and OAF	IAF	27	6	24.29365	22.2583	2.03535	4	1
PDHA1	higher in NP, NP/IAF and OAF	NP, NP/IAF and OAF	IAF	27	6	25.9452666666667	22.4069	3.53836666666666	3	1
PEA15	higher in NP, NP/IAF and OAF	NP, NP/IAF and OAF	IAF	27	6	26.4861166666667	24.2905	2.19561666666667	6	1
PGD	higher in NP, NP/IAF and OAF	NP, NP/IAF and OAF	IAF	27	6	27.09945	24.7059333333333	2.39351666666667	14	3
PHB	higher in NP, NP/IAF and OAF	NP, NP/IAF and OAF	IAF	27	6	26.7344142857143	23.0044	3.73001428571429	7	1
PLEC	higher in NP, NP/IAF and OAF	NP, NP/IAF and OAF	IAF	27	6	27.5752518518519	25.3393833333333	2.23586851851852	27	6
POSTN	higher in NP, NP/IAF and OAF	NP, NP/IAF and OAF	IAF	27	6	30.235062962963	27.9836333333333	2.25142962962963	27	6
PRKCDBP	higher in NP, NP/IAF and OAF	NP, NP/IAF and OAF	IAF	27	6	26.6330333333333	24.1405	2.49253333333333	9	2
RAB7A	higher in NP, NP/IAF and OAF	NP, NP/IAF and OAF	IAF	27	6	26.6512214285714	24.4143	2.23692142857143	14	3
RPL13A	higher in NP, NP/IAF and OAF	NP, NP/IAF and OAF	IAF	27	6	25.7376666666667	23.3231	2.41456666666667	9	1
RPL27	higher in NP, NP/IAF and OAF	NP, NP/IAF and OAF	IAF	27	6	26.5458166666667	24.005	2.54081666666667	6	1
RPN1	higher in NP, NP/IAF and OAF	NP, NP/IAF and OAF	IAF	27	6	26.5074714285714	24.4765333333333	2.0309380952381	14	3
RPS15A	higher in NP, NP/IAF and OAF	NP, NP/IAF and OAF	IAF	27	6	25.833	23.2331	2.5999	3	1
RPSA	higher in NP, NP/IAF and OAF	NP, NP/IAF and OAF	IAF	27	6	26.7585692307692	24.384	2.37456923076923	13	2
RRBP1	higher in NP, NP/IAF and OAF	NP, NP/IAF and OAF	IAF	27	6	26.0909333333333	23.9106333333333	2.1803	24	3
SEC23A	higher in NP, NP/IAF and OAF	NP, NP/IAF and OAF	IAF	27	6	25.7407666666667	23.049	2.69176666666667	6	1
SERPINB1	higher in NP, NP/IAF and OAF	NP, NP/IAF and OAF	IAF	27	6	26.34465625	23.8603	2.48435625	16	3
SFPQ	higher in NP, NP/IAF and OAF	NP, NP/IAF and OAF	IAF	27	6	28.05015	25.05585	2.9943	8	2
SPON1	higher in NP, NP/IAF and OAF	NP, NP/IAF and OAF	IAF	27	6	26.6792785714286	24.31168	2.36759857142857	14	5
SPTAN1	higher in NP, NP/IAF and OAF	NP, NP/IAF and OAF	IAF	27	6	26.7107269230769	24.6507333333333	2.05999358974359	26	6
SRPX	higher in NP, NP/IAF and OAF	NP, NP/IAF and OAF	IAF	27	6	26.21896	24.17885	2.04011	10	2
ST13	higher in NP, NP/IAF and OAF	NP, NP/IAF and OAF	IAF	27	6	27.21132	24.5399	2.67142	10	1
SYNCRIP	higher in NP, NP/IAF and OAF	NP, NP/IAF and OAF	IAF	27	6	26.22859	22.62855	3.60004	10	2
TMOD4	higher in NP, NP/IAF and OAF	NP, NP/IAF and OAF	IAF	27	6	27.82315	24.5735	3.24965	2	1
TOR1B	higher in NP, NP/IAF and OAF	NP, NP/IAF and OAF	IAF	27	6	26.32558	22.824	3.50158	5	1
TPM1	higher in NP, NP/IAF and OAF	NP, NP/IAF and OAF	IAF	27	6	27.5188444444444	24.40535	3.11349444444445	18	4
TPM2	higher in NP, NP/IAF and OAF	NP, NP/IAF and OAF	IAF	27	6	28.5361157894737	26.1016	2.43451578947369	19	4
TPM4	higher in NP, NP/IAF and OAF	NP, NP/IAF and OAF	IAF	27	6	28.5668727272727	26.39505	2.17182272727273	11	2
TPSAB1	higher in NP, NP/IAF and OAF	NP, NP/IAF and OAF	IAF	27	6	26.7225272727273	23.3196	3.40292727272727	11	1
TUBB	higher in NP, NP/IAF and OAF	NP, NP/IAF and OAF	IAF	27	6	27.1892	24.5908	2.5984	11	2
VIT	higher in NP, NP/IAF and OAF	NP, NP/IAF and OAF	IAF	27	6	26.2275727272727	23.1402	3.08737272727273	11	1
XRCC6	higher in NP, NP/IAF and OAF	NP, NP/IAF and OAF	IAF	27	6	27.195996	24.7178	2.478196	25	4
C1QA	higher in IAF	NP, NP/IAF and OAF	IAF	27	6	26.85550625	29.85945	-3.00394375	16	2
F5	higher in IAF	NP, NP/IAF and OAF	IAF	27	6	26.1561166666667	28.3466	-2.19048333333333	18	2
FAM184B	higher in IAF	NP, NP/IAF and OAF	IAF	27	6	24.66208	27.4747	-2.81262	5	1
KRT5	higher in IAF	NP, NP/IAF and OAF	IAF	27	6	23.2715058823529	25.30545	-2.03394411764706	17	2
LGALS3BP	higher in IAF	NP, NP/IAF and OAF	IAF	27	6	27.5815909090909	30.1273	-2.54570909090909	22	2
SAA4	higher in IAF	NP, NP/IAF and OAF	IAF	27	6	29.0935588235294	31.32245	-2.22889117647059	17	2
THUMPD1	higher in IAF	NP, NP/IAF and OAF	IAF	27	6	23.0363	25.3924	-2.3561	1	1

## Sheet: Sheet8
gene	status	group1	group2	Num of samples in group1	Num of samples in group2	Num of valid values in group1	Num of valid values in group2
CRYZ	exclusive in NP, NP/IAF and OAF	NP, NP/IAF and OAF	IAF	27	6	15	0
EEF1B2	exclusive in NP, NP/IAF and OAF	NP, NP/IAF and OAF	IAF	27	6	16	0
GOT1	exclusive in NP, NP/IAF and OAF	NP, NP/IAF and OAF	IAF	27	6	16	0

## Sheet: Sheet9
gene	status	group1	group2	Num of samples in group1	Num of samples in group2	average log2(LFQ) in group1	average log2(LFQ) in group2	log2(Fold change)	Num of valid values in group1	Num of valid values in group2	p-value
A1BG	higher in L4/5	L5/S1	L4/5	11	11	28.0164909090909	31.5478818181818	-3.53139090909091	11	11	2.74741791533845e-05
ALB	higher in L4/5	L5/S1	L4/5	11	11	37.3750363636364	39.6372	-2.26216363636364	11	11	4.54961887274391e-07
APOA2	higher in L4/5	L5/S1	L4/5	11	11	28.4312666666667	32.4718545454545	-4.04058787878788	9	11	9.46237520794364e-05
APOB	higher in L4/5	L5/S1	L4/5	11	11	27.5055636363636	32.8884272727273	-5.38286363636363	11	11	7.77781278335345e-05
APOH	higher in L4/5	L5/S1	L4/5	11	11	31.1548181818182	33.2057181818182	-2.0509	11	11	3.11069712681277e-06
C8G	higher in L4/5	L5/S1	L4/5	11	11	27.7328818181818	30.6635545454545	-2.93067272727273	11	11	4.99741646128756e-05
CFH	higher in L4/5	L5/S1	L4/5	11	11	31.2894090909091	32.9258636363636	-1.63645454545454	11	11	7.70274193933396e-05
CFI	higher in L4/5	L5/S1	L4/5	11	11	27.4776727272727	30.1549090909091	-2.67723636363636	11	11	4.37584154854781e-05
F12	higher in L4/5	L5/S1	L4/5	11	11	26.2268125	29.5625727272727	-3.33576022727273	8	11	1.2223563482021e-06
F2	higher in L4/5	L5/S1	L4/5	11	11	27.7319181818182	31.1381090909091	-3.40619090909091	11	11	6.39609405035154e-06
GC	higher in L4/5	L5/S1	L4/5	11	11	30.9002818181818	33.2888636363636	-2.38858181818182	11	11	4.37086372444615e-06
HP	higher in L4/5	L5/S1	L4/5	11	11	31.6382727272727	34.3073727272727	-2.6691	11	11	1.45797453200156e-05
HPX	higher in L4/5	L5/S1	L4/5	11	11	31.4482727272727	34.2034909090909	-2.75521818181818	11	11	3.65859546444824e-06
IGK	higher in L4/5	L5/S1	L4/5	11	11	33.9616363636364	35.5560363636364	-1.5944	11	11	4.31775340131112e-05
ORM1	higher in L4/5	L5/S1	L4/5	11	11	32.0068181818182	34.2044	-2.19758181818182	11	11	2.99554979198647e-05
ORM2	higher in L4/5	L5/S1	L4/5	11	11	30.0634181818182	32.4444909090909	-2.38107272727273	11	11	7.15421189890874e-06

[truncated: 41 more sheets: Sheet10, Sheet11, Sheet12, Sheet13, Sheet14, Sheet15, Sheet16, Sheet17, Sheet18, Sheet19, Sheet20, Sheet21, Sheet22, Sheet23, Sheet24, Sheet25, Sheet26, Sheet27, Sheet28, Sheet29 …]
