# Supplementary material for: DIPPER, a spatiotemporal proteomics atlas of human intervertebral discs for exploring ageing and degeneration dynamics
Source: eLife. 2020 Dec 31;9:e64940. doi: 10.7554/eLife.64940 (PMC7857729; doi:10.7554/eLife.64940)
Supplement: Supplementary file 4. [file elife-64940-supp4.xlsx]

## Sheet: Summary of datasheets
Supplementary File 4 - Differentially Expressed Proteins (DEPs) detected among comparisons between the young and the aged discs
Comparison No.	Data-Sheet ID	Scope	Approach		Group1	Number of Samples in Group1	Group2	Number of Samples in Group 2	Num of DEPs
1	Sheet-1	young -vs- aged	Fold-change>2	1	All young	33	All aged	33	87
	Sheet-2	young -vs- aged	Exclusively detected in one group only	1	All young	33	All aged	33	5
	Sheet-3	young -vs- aged	Statistical	1	All young	33	All aged	33	171
2	Sheet-4	young -vs- aged	Fold-change>2	2	young OAF	12	aged OAF	12	140
	Sheet-5	young -vs- aged	Exclusively detected in one group only	2	young OAF	12	aged OAF	12	19
	Sheet-6	young -vs- aged	Statistical	2	young OAF	12	aged OAF	12	36
3	Sheet-7	young -vs- aged	Fold-change>2	3	young inner disc	21	aged inner disc	21	113
	Sheet-8	young -vs- aged	Exclusively detected in one group only	3	young inner disc	21	aged inner disc	21	29
	Sheet-9	young -vs- aged	Statistical	3	young inner disc	21	aged inner disc	21	212
4	Sheet-10	young -vs- aged	Fold-change>2	4	young NP	3	aged NP	3	231
	Sheet-11	young -vs- aged	Exclusively detected in one group only	4	young NP	3	aged NP	3	176
	N/A	young -vs- aged	Statistical	4	young NP	3	aged NP	3	0
5	Sheet-12	young -vs- aged	Fold-change>2	5	young IAF	6	aged IAF	6	158
	Sheet-13	young -vs- aged	Exclusively detected in one group only	5	young IAF	6	aged IAF	6	39
	Sheet-14	young -vs- aged	Statistical	5	young IAF	6	aged IAF	6	13
6	Sheet-15	young -vs- aged	Fold-change>2	6	young NP/IAF	12	aged NP/IAF	12	122
	Sheet-16	young -vs- aged	Exclusively detected in one group only	6	young NP/IAF	12	aged NP/IAF	12	49
	Sheet-17	young -vs- aged	Statistical	6	young NP/IAF	12	aged NP/IAF	12	162
7	Sheet-18	young -vs- aged	Fold-change>2	7	young Anterior & posterior @ NP/IAF	6	aged Anterior & posterior @ NP/IAF	6	173
	Sheet-19	young -vs- aged	Exclusively detected in one group only	7	young Anterior & posterior @ NP/IAF	6	aged Anterior & posterior @ NP/IAF	6	71
	Sheet-20	young -vs- aged	Statistical	7	young Anterior & posterior @ NP/IAF	6	aged Anterior & posterior @ NP/IAF	6	27
8	Sheet-21	young -vs- aged	Fold-change>2	8	young Left & right @ NP/IAF	6	aged Left & right @ NP/IAF	6	175
	Sheet-22	young -vs- aged	Exclusively detected in one group only	8	young Left & right @ NP/IAF	6	aged Left & right @ NP/IAF	6	65
	Sheet-23	young -vs- aged	Statistical	8	young Left & right @ NP/IAF	6	aged Left & right @ NP/IAF	6	53
9	Sheet-24	young -vs- aged	Fold-change>2	9	young Anterior & posterior @ OAF	6	aged Anterior & posterior @ OAF	6	164
	Sheet-25	young -vs- aged	Exclusively detected in one group only	9	young Anterior & posterior @ OAF	6	aged Anterior & posterior @ OAF	6	59
	Sheet-26	young -vs- aged	Statistical	9	young Anterior & posterior @ OAF	6	aged Anterior & posterior @ OAF	6	11
10	Sheet-27	young -vs- aged	Fold-change>2	10	young Left & right @ OAF	6	aged Left & right @ OAF	6	170
	Sheet-28	young -vs- aged	Exclusively detected in one group only	10	young Left & right @ OAF	6	aged Left & right @ OAF	6	70
	N/A	young -vs- aged	Statistical	10	young Left & right @ OAF	6	aged Left & right @ OAF	6	0
11	Sheet-29	young -vs- aged	Fold-change>2	24	young L3/4	11	aged L3/4	11	200
	Sheet-30	young -vs- aged	Exclusively detected in one group only	24	young L3/4	11	aged L3/4	11	36
	Sheet-31	young -vs- aged	Statistical	24	young L3/4	11	aged L3/4	11	88
12	Sheet-32	young -vs- aged	Fold-change>2	25	young L4/5	11	aged L4/5	11	133
	Sheet-33	young -vs- aged	Exclusively detected in one group only	25	young L4/5	11	aged L4/5	11	46
	Sheet-34	young -vs- aged	Statistical	25	young L4/5	11	aged L4/5	11	76
13	Sheet-35	young -vs- aged	Fold-change>2	26	young L5/S1	11	aged L5/S1	11	92
	Sheet-36	young -vs- aged	Exclusively detected in one group only	26	young L5/S1	11	aged L5/S1	11	15
	Sheet-37	young -vs- aged	Statistical	26	young L5/S1	11	aged L5/S1	11	36

## Sheet: Sheet1
gene	status	group1	group2	Num of samples in group1	Num of samples in group2	average log2(LFQ) in group1	average log2(LFQ) in group2	log2(Fold change)	Num of valid values in group1	Num of valid values in group2
B4GAT1	higher in all young	All young	All aged	33	33	25.4927	22.8677	2.62495	2	2
COL9A1	higher in all young	All young	All aged	33	33	29.9124	26.2873	3.62511	33	16
COL9A3	higher in all young	All young	All aged	33	33	27.7677	24.3437	3.42402	5	1
DDB1	higher in all young	All young	All aged	33	33	27.8574	25.8121	2.04536	4	5
FAM162A	higher in all young	All young	All aged	33	33	26.748	24.2034	2.54457	1	3
HRAS	higher in all young	All young	All aged	33	33	25.401	23.2151	2.1859	1	1
IGKV1-6	higher in all young	All young	All aged	33	33	26.4701	23.8352	2.63488	1	5
KAL1	higher in all young	All young	All aged	33	33	28.2828	25.8216	2.46119	31	6
LANCL1	higher in all young	All young	All aged	33	33	27.5829	24.6053	2.9776	1	1
LMAN2	higher in all young	All young	All aged	33	33	30.0741	27.8153	2.25878	3	4
MRC1	higher in all young	All young	All aged	33	33	27.9379	25.7139	2.22403	1	9
MYH1	higher in all young	All young	All aged	33	33	28.8698	25.4968	3.37298	33	33
PRKDC	higher in all young	All young	All aged	33	33	27.1161	23.822	3.29407	8	1
RNASET2	higher in all young	All young	All aged	33	33	27.1694	24.8624	2.30692	3	2
SELP	higher in all young	All young	All aged	33	33	26.1255	23.1631	2.9624	1	1
SLIT3	higher in all young	All young	All aged	33	33	27.0418	24.7174	2.32448	29	14
SPAG9	higher in all young	All young	All aged	33	33	27.9751	25.8453	2.12983	1	3
STXBP1	higher in all young	All young	All aged	33	33	25.2628	23.1172	2.1456	1	1
TNMD	higher in all young	All young	All aged	33	33	28.0323	25.4054	2.62689	9	6
VIT	higher in all young	All young	All aged	33	33	30.0381	25.9703	4.06785	33	12
SEPT11	higher in all aged	All young	All aged	33	33	25.8642	28.3071	-2.44295	10	6
A1BG	higher in all aged	All young	All aged	33	33	25.0366	30.6752	-5.6386	16	33
AHSG	higher in all aged	All young	All aged	33	33	27.2079	31.1907	-3.98281	14	33
AMBP	higher in all aged	All young	All aged	33	33	28.5014	31.0124	-2.51098	22	33
APCS	higher in all aged	All young	All aged	33	33	28.5744	32.3185	-3.74412	11	33
APOA2	higher in all aged	All young	All aged	33	33	27.4594	31.2342	-3.77474	8	31
APOC1	higher in all aged	All young	All aged	33	33	27.6207	30.4407	-2.82004	9	31
APOC2	higher in all aged	All young	All aged	33	33	23.8466	26.294	-2.44738	1	10
APOC3	higher in all aged	All young	All aged	33	33	26.3176	29.0143	-2.69679	9	29
APOM	higher in all aged	All young	All aged	33	33	25.5376	27.7227	-2.18506	9	24
BPIFB1	higher in all aged	All young	All aged	33	33	24.5291	27.7415	-3.2124	1	1
C1QBP	higher in all aged	All young	All aged	33	33	24.461	26.6134	-2.15239	7	6
C8G	higher in all aged	All young	All aged	33	33	25.6279	29.9419	-4.31407	16	33
CAPN1	higher in all aged	All young	All aged	33	33	23.7299	25.9998	-2.26983	5	6
CCT6A	higher in all aged	All young	All aged	33	33	24.1357	26.1553	-2.01964	4	7
CD14	higher in all aged	All young	All aged	33	33	25.4423	27.9266	-2.48424	7	30
CD5L	higher in all aged	All young	All aged	33	33	26.233	28.6059	-2.37292	7	27
CFHR1	higher in all aged	All young	All aged	33	33	25.5007	28.779	-3.27827	6	24
CPB2	higher in all aged	All young	All aged	33	33	24.7966	28.8773	-4.08076	9	25
CRLF1	higher in all aged	All young	All aged	33	33	24.9642	27.7404	-2.77619	8	31
CRP	higher in all aged	All young	All aged	33	33	27.3803	29.5647	-2.18437	3	22
EPYC	higher in all aged	All young	All aged	33	33	25.2752	28.563	-3.28785	15	30
ETFB	higher in all aged	All young	All aged	33	33	24.703	27.1757	-2.47266	5	4
F12	higher in all aged	All young	All aged	33	33	26.114	29.0318	-2.91772	7	30
FAM49B	higher in all aged	All young	All aged	33	33	28.7277	30.7579	-2.03025	2	3
FHL3	higher in all aged	All young	All aged	33	33	20.808	27.007	-6.199	1	1
GPLD1	higher in all aged	All young	All aged	33	33	24.5126	26.9437	-2.43113	3	25
HUWE1	higher in all aged	All young	All aged	33	33	27.4571	29.6834	-2.2263	3	2
IGFALS	higher in all aged	All young	All aged	33	33	24.2632	28.1961	-3.93292	11	26
IGHD	higher in all aged	All young	All aged	33	33	25.8974	28.6397	-2.74226	6	28
IGHG3	higher in all aged	All young	All aged	33	33	26.7896	31.1634	-4.37384	14	33
IGHG4	higher in all aged	All young	All aged	33	33	27.0606	30.03	-2.96933	8	29
IGHM	higher in all aged	All young	All aged	33	33	24.3916	33.2764	-8.88479	16	33
IGHV3-23	higher in all aged	All young	All aged	33	33	27.1733	29.5332	-2.35993	1	9
IGJ	higher in all aged	All young	All aged	33	33	27.415	29.7573	-2.34232	12	31
IGKV3-20	higher in all aged	All young	All aged	33	33	25.4355	29.6677	-4.23218	1	23
ITIH3	higher in all aged	All young	All aged	33	33	25.6486	28.2999	-2.65131	11	30
KLKB1	higher in all aged	All young	All aged	33	33	25.3936	28.3121	-2.91844	15	30
KNG1	higher in all aged	All young	All aged	33	33	27.9361	31.7028	-3.7667	13	33
LBP	higher in all aged	All young	All aged	33	33	25.6306	29.2059	-3.57533	12	31
LGALS3BP	higher in all aged	All young	All aged	33	33	25.4305	27.7937	-2.36322	14	24
LRG1	higher in all aged	All young	All aged	33	33	25.6898	29.3195	-3.62966	10	31
MANF	higher in all aged	All young	All aged	33	33	21.8785	25.5926	-3.71413	1	4
MT2A	higher in all aged	All young	All aged	33	33	19.8627	22.336	-2.4733	1	1
NAMPT	higher in all aged	All young	All aged	33	33	24.7756	27.0479	-2.27228	2	4
ORM2	higher in all aged	All young	All aged	33	33	28.4953	32.0612	-3.5659	15	33
P0DOX2	higher in all aged	All young	All aged	33	33	27.5739	30.1682	-2.59421	8	31
PADI2	higher in all aged	All young	All aged	33	33	24.3542	27.6393	-3.28505	1	2
PGLYRP2	higher in all aged	All young	All aged	33	33	24.8604	29.9518	-5.09144	16	31
PHPT1	higher in all aged	All young	All aged	33	33	22.9682	25.6246	-2.65643	6	6
PMM2	higher in all aged	All young	All aged	33	33	23.8617	26.5251	-2.66335	1	2
PODN	higher in all aged	All young	All aged	33	33	24.4925	27.0449	-2.55238	2	6
PON1	higher in all aged	All young	All aged	33	33	23.2977	29.3448	-6.04704	13	29
PROZ	higher in all aged	All young	All aged	33	33	23.9914	26.0772	-2.08578	1	10
ROCK1	higher in all aged	All young	All aged	33	33	25.3362	27.4638	-2.12758	2	3
RPS2	higher in all aged	All young	All aged	33	33	24.6018	26.6335	-2.03174	9	7
SAA4	higher in all aged	All young	All aged	33	33	25.4665	29.3282	-3.86171	3	19
SDHA	higher in all aged	All young	All aged	33	33	23.0509	26.4053	-3.35436	2	5
SEMA3A	higher in all aged	All young	All aged	33	33	26.8015	28.9732	-2.17172	14	31
SERPINA10	higher in all aged	All young	All aged	33	33	24.589	27.6794	-3.09036	5	25
SERPINA4	higher in all aged	All young	All aged	33	33	25.1252	29.6091	-4.48387	12	33
SERPINA6	higher in all aged	All young	All aged	33	33	25.5301	28.1694	-2.63925	14	32
TCAP	higher in all aged	All young	All aged	33	33	24.7599	27.28	-2.5201	1	2
TNFAIP6	higher in all aged	All young	All aged	33	33	26.658	29.5367	-2.87866	13	32
TNNI2	higher in all aged	All young	All aged	33	33	25.0835	28.0656	-2.98208	14	4
TPP1	higher in all aged	All young	All aged	33	33	25.0457	27.3012	-2.25552	2	9
XIRP1	higher in all aged	All young	All aged	33	33	25.4927	28.6441	-3.15145	1	18

## Sheet: Sheet2
gene	status	group1	group2	Num of samples in group1	Num of samples in group2	Num of valid values in group1	Num of valid values in group2
CLSTN2	exclusive in all young	All young	All aged	33	33	17	0
ARID1A	exclusive in all aged	All young	All aged	33	33	0	20
IGHV3-72	exclusive in all aged	All young	All aged	33	33	0	21
IGKV1D-13	exclusive in all aged	All young	All aged	33	33	0	19
IGHV3-7	exclusive in all aged	All young	All aged	33	33	0	17

## Sheet: Sheet3
gene	status	group1	group2	Num of samples in group1	Num of samples in group2	average log2(LFQ) in group1	average log2(LFQ) in group2	log2(Fold change)	Num of valid values in group1	Num of valid values in group2	p-value
A2M	higher in all aged	All young	All aged	33	33	32.0396	34.7796	-2.73994	33	33	9.62354e-12
ABI3BP	higher in all young	All young	All aged	33	33	37.3096	35.3134	1.99624	33	33	3.94905e-11
ACAN	higher in all young	All young	All aged	33	33	39.4891	38.1695	1.31967	33	33	6.77746e-06
AFM	higher in all aged	All young	All aged	33	33	25.2913	29.1305	-3.83923	18	33	1.43764e-08
ALB	higher in all aged	All young	All aged	33	33	35.097	38.9552	-3.85825	33	33	2.37228e-15
ANG	higher in all young	All young	All aged	33	33	33.6858	32.0079	1.67795	33	33	2.38976e-07
ANGPTL2	higher in all aged	All young	All aged	33	33	30.1744	31.1946	-1.02012	33	33	2.15088e-09
ANXA1	higher in all young	All young	All aged	33	33	32.8216	31.2909	1.53075	33	33	7.42606e-10
ANXA2	higher in all young	All young	All aged	33	33	33.537	31.9498	1.5872	33	33	2.78317e-07
ANXA4	higher in all young	All young	All aged	33	33	31.4765	29.5171	1.95948	33	33	7.64458e-09
ANXA5	higher in all young	All young	All aged	33	33	32.2921	31.306	0.986082	33	33	3.20198e-06
APOA1	higher in all aged	All young	All aged	33	33	28.7198	35.8976	-7.17782	33	33	2.0587e-17
APOA4	higher in all aged	All young	All aged	33	33	25.1515	33.7869	-8.63544	32	33	4.99423e-26
APOB	higher in all aged	All young	All aged	33	33	26.0687	31.4998	-5.43118	33	33	5.81448e-10
APOE	higher in all aged	All young	All aged	33	33	27.0996	31.9824	-4.88281	31	33	2.56851e-11
APOH	higher in all aged	All young	All aged	33	33	28.9618	32.6427	-3.68086	26	33	3.22234e-15
ATRN	higher in all young	All young	All aged	33	33	28.2796	26.8829	1.39672	31	26	6.93925e-06
AZGP1	higher in all aged	All young	All aged	33	33	27.4132	30.5284	-3.11525	28	33	6.16334e-11
BGN	higher in all young	All young	All aged	33	33	37.7677	36.3755	1.39226	33	33	2.18089e-07
C2	higher in all aged	All young	All aged	33	33	25.2616	28.6782	-3.41658	24	32	3.02743e-08
C3	higher in all aged	All young	All aged	33	33	33.4427	35.4699	-2.02715	33	33	6.13351e-11
C4B	higher in all aged	All young	All aged	33	33	30.9686	32.6411	-1.67247	33	33	8.86056e-07
C4BPA	higher in all aged	All young	All aged	33	33	24.8452	29.7138	-4.86864	20	32	9.80467e-10
C5	higher in all aged	All young	All aged	33	33	23.352	29.7366	-6.38463	29	33	1.62126e-10
C6	higher in all aged	All young	All aged	33	33	25.6804	30.2607	-4.58034	30	33	1.60542e-14
C7	higher in all aged	All young	All aged	33	33	25.9242	30.2546	-4.33038	19	33	1.69566e-08
C8A	higher in all aged	All young	All aged	33	33	23.546	29.5169	-5.97087	17	33	2.22911e-10
C8B	higher in all aged	All young	All aged	33	33	24.3876	30.268	-5.88046	26	33	2.06595e-14
C9	higher in all aged	All young	All aged	33	33	24.8087	32.4508	-7.64205	28	33	2.93995e-17
CALU	higher in all young	All young	All aged	33	33	29.6909	27.9231	1.76779	33	32	2.03924e-09
CAPS	higher in all young	All young	All aged	33	33	29.8405	28.2729	1.56762	33	33	3.59751e-09
CCL18	higher in all young	All young	All aged	33	33	29.2567	27.6935	1.56317	24	18	1.23587e-06
CD109	higher in all young	All young	All aged	33	33	31.9856	30.3126	1.67298	33	33	3.25901e-10
CD9	higher in all young	All young	All aged	33	33	27.5477	26.3866	1.16101	26	21	0.000106669
CFB	higher in all aged	All young	All aged	33	33	31.6301	32.9589	-1.32883	33	33	5.26573e-07
CFH	higher in all aged	All young	All aged	33	33	30.7074	32.8116	-2.10425	33	33	1.57956e-08
CFI	higher in all aged	All young	All aged	33	33	25.9117	29.5254	-3.61369	19	33	5.09491e-09
CHAD	higher in all young	All young	All aged	33	33	37.4844	35.5215	1.96282	33	33	7.30073e-07
CHRDL2	higher in all young	All young	All aged	33	33	30.3644	28.2301	2.13425	33	31	9.2696e-06
CILP2	higher in all young	All young	All aged	33	33	36	35.1615	0.838503	33	33	8.21224e-05
CKB	higher in all young	All young	All aged	33	33	28.6187	27.0584	1.56027	33	28	6.52863e-10
CKM	higher in all young	All young	All aged	33	33	31.3064	27.9359	3.37057	33	31	7.19682e-07
CLEC3A	higher in all young	All young	All aged	33	33	34.2126	30.7199	3.49268	33	33	4.99627e-11
CLSTN1	higher in all young	All young	All aged	33	33	28.4851	26.949	1.5361	32	29	7.10082e-06
CLU	higher in all aged	All young	All aged	33	33	36.3839	37.6603	-1.27647	33	33	2.18754e-08
COL11A1	higher in all young	All young	All aged	33	33	32.5598	30.014	2.54574	33	33	5.75779e-11
COL11A2	higher in all young	All young	All aged	33	33	35.4119	31.0072	4.40472	33	33	1.0307e-16
COL12A1	higher in all young	All young	All aged	33	33	33.285	30.9879	2.2971	33	33	8.79105e-05
COL14A1	higher in all young	All young	All aged	33	33	32.1662	29.1936	2.97261	33	33	4.14878e-05
COL15A1	higher in all young	All young	All aged	33	33	31.327	28.9353	2.39165	33	33	2.10621e-14
COL1A2	higher in all young	All young	All aged	33	33	37.345	35.6412	1.70388	33	33	1.41422e-14
COL2A1	higher in all young	All young	All aged	33	33	37.7588	34.6966	3.06227	33	33	9.94432e-12
COL3A1	higher in all young	All young	All aged	33	33	31.6258	29.5794	2.04647	33	33	1.0045e-10
COL5A1	higher in all young	All young	All aged	33	33	30.9494	28.8548	2.0946	33	33	2.3732e-13
COL5A2	higher in all young	All young	All aged	33	33	30.7658	27.7641	3.00175	33	32	2.84003e-17
COL6A1	higher in all young	All young	All aged	33	33	36.7368	34.5832	2.15364	33	33	1.3082e-09
COL6A2	higher in all young	All young	All aged	33	33	36.0371	33.6454	2.39171	33	33	2.18828e-11
COL6A3	higher in all young	All young	All aged	33	33	37.9936	35.9148	2.07874	33	33	1.3139e-10
COL8A1	higher in all young	All young	All aged	33	33	27.2555	25.6763	1.57915	30	19	2.27593e-07
CTSD	higher in all aged	All young	All aged	33	33	27.4006	28.6272	-1.22656	23	33	8.18604e-05
CYTL1	higher in all young	All young	All aged	33	33	30.6849	29.3154	1.36948	33	31	8.96823e-07
DSC3	higher in all young	All young	All aged	33	33	28.3272	26.9196	1.40762	26	22	3.22284e-05
ECM1	higher in all aged	All young	All aged	33	33	27.0206	30.1174	-3.09683	28	33	3.96558e-13
ECM2	higher in all young	All young	All aged	33	33	28.5762	27.2393	1.33681	33	33	4.24812e-08
EHD2	higher in all young	All young	All aged	33	33	28.7501	26.8111	1.93893	33	28	6.29117e-05
EMILIN1	higher in all young	All young	All aged	33	33	30.7556	29.8097	0.945912	33	33	1.08633e-07
EMILIN3	higher in all young	All young	All aged	33	33	30.0884	27.3591	2.72928	33	29	3.2219e-08
ENPP2	higher in all young	All young	All aged	33	33	29.2531	26.0664	3.18676	32	29	5.1708e-13
F13A1	higher in all aged	All young	All aged	33	33	27.4163	30.4544	-3.03811	33	33	2.92368e-12
F2	higher in all aged	All young	All aged	33	33	24.5994	30.5113	-5.9119	30	33	5.25926e-15
FBN1	higher in all young	All young	All aged	33	33	32.4547	30.2128	2.24198	33	33	1.85026e-13
FGA	higher in all aged	All young	All aged	33	33	26.924	33.6696	-6.7456	33	33	7.53405e-14
FGB	higher in all aged	All young	All aged	33	33	27.5903	34.2198	-6.62949	33	33	4.38491e-14
FGFBP2	higher in all young	All young	All aged	33	33	33.3235	31.8955	1.42796	33	33	8.9043e-05
FGG	higher in all aged	All young	All aged	33	33	27.5811	34.5309	-6.94975	32	33	6.18857e-14
FLT1	higher in all aged	All young	All aged	33	33	25.31	26.5323	-1.22228	20	31	6.82186e-05
FMOD	higher in all young	All young	All aged	33	33	36.7714	35.712	1.05932	33	33	1.92976e-05
FN1	higher in all aged	All young	All aged	33	33	38.2872	39.8196	-1.53242	33	33	3.10533e-07
FNDC1	higher in all young	All young	All aged	33	33	32.3687	30.0443	2.32434	33	33	3.11035e-15
FRZB	higher in all young	All young	All aged	33	33	30.4323	28.2716	2.16075	33	27	1.72848e-09
FTL	higher in all aged	All young	All aged	33	33	30.195	30.892	-0.696936	33	33	3.69941e-05
GC	higher in all aged	All young	All aged	33	33	27.5043	32.6459	-5.14155	20	33	1.71531e-06
GNAS	higher in all young	All young	All aged	33	33	26.7045	25.4289	1.27561	32	22	3.90035e-06
GNB1	higher in all young	All young	All aged	33	33	27.1745	25.9973	1.17723	28	26	0.000132544
GPC1	higher in all young	All young	All aged	33	33	27.2304	25.7965	1.43393	26	23	0.000147978
HAPLN1	higher in all young	All young	All aged	33	33	36.0709	34.5916	1.47932	33	33	1.55685e-06
HAPLN3	higher in all young	All young	All aged	33	33	31.0921	29.3313	1.76078	32	29	9.57645e-10
HHIPL2	higher in all young	All young	All aged	33	33	31.4195	28.3883	3.03114	33	33	3.28935e-14
HP	higher in all aged	All young	All aged	33	33	28.9921	33.8165	-4.82439	32	33	1.66746e-15
HPX	higher in all aged	All young	All aged	33	33	27.1119	33.5715	-6.45963	28	33	1.25472e-11
HRG	higher in all aged	All young	All aged	33	33	25.5779	31.0092	-5.43123	20	33	1.95699e-09
HSPG2	higher in all young	All young	All aged	33	33	34.662	33.4243	1.23766	33	33	8.17071e-17
HTRA1	higher in all aged	All young	All aged	33	33	32.4377	33.9068	-1.46914	33	33	1.16382e-07
IGFBP7	higher in all young	All young	All aged	33	33	29.9763	28.3743	1.60206	33	31	7.8006e-08
IGHA1	higher in all aged	All young	All aged	33	33	26.0008	31.8252	-5.82445	23	33	6.89477e-09
IGHG1	higher in all aged	All young	All aged	33	33	31.896	35.9376	-4.04155	33	33	8.70012e-16
IGHG2	higher in all aged	All young	All aged	33	33	27.6582	32.1701	-4.51196	23	33	1.22092e-10
IGK	higher in all aged	All young	All aged	33	33	31.5577	35.247	-3.68931	33	33	4.73282e-15
IGKC	higher in all aged	All young	All aged	33	33	28.6024	32.1843	-3.58192	29	33	1.21429e-14
IGLC6	higher in all aged	All young	All aged	33	33	27.7834	30.2283	-2.44495	21	33	1.86079e-07
IGLL5	higher in all aged	All young	All aged	33	33	28.7411	32.4182	-3.67718	21	33	1.03073e-11
IL17B	higher in all young	All young	All aged	33	33	30.7718	25.4144	5.35745	33	20	4.03766e-17
ITGAV	higher in all young	All young	All aged	33	33	27.7488	25.469	2.27985	23	21	3.28833e-06
ITIH1	higher in all aged	All young	All aged	33	33	26.094	30.987	-4.89302	22	33	6.30638e-06
ITIH2	higher in all aged	All young	All aged	33	33	25.4184	31.8439	-6.42541	27	32	8.42248e-12
ITIH4	higher in all aged	All young	All aged	33	33	25.8462	31.8009	-5.95468	30	33	1.01773e-14
ITIH5	higher in all young	All young	All aged	33	33	30.8189	29.0516	1.76727	33	33	2.60067e-11
KRT14	higher in all young	All young	All aged	33	33	28.7778	26.1328	2.64496	27	23	6.61145e-07
KRT19	higher in all young	All young	All aged	33	33	28.3899	24.0746	4.31536	32	23	1.65555e-07
KRT8	higher in all young	All young	All aged	33	33	29.0349	25.0984	3.93653	31	29	8.76972e-07
LAMA5	higher in all young	All young	All aged	33	33	28.0476	26.369	1.67855	31	30	9.62453e-07
LDHA	higher in all young	All young	All aged	33	33	31.9153	31.1821	0.733124	33	33	1.45944e-07
LECT1	higher in all young	All young	All aged	33	33	31.991	30.1494	1.84164	33	31	6.61546e-07
LECT2	higher in all young	All young	All aged	33	33	31.5247	28.914	2.6107	32	27	3.07034e-09
LGALS3	higher in all young	All young	All aged	33	33	28.1408	26.8838	1.25702	29	32	3.98887e-05
LOX	higher in all young	All young	All aged	33	33	30.2445	28.0299	2.21459	33	32	9.90372e-11
LOXL2	higher in all young	All young	All aged	33	33	30.3593	28.8092	1.55005	33	33	8.72956e-08
LOXL3	higher in all young	All young	All aged	33	33	30.2766	29.176	1.10057	33	33	3.4361e-05
LTBP4	higher in all young	All young	All aged	33	33	27.7026	26.5222	1.18039	29	30	4.51484e-05
LYZ	higher in all young	All young	All aged	33	33	34.7619	33.1681	1.59382	33	33	3.0053e-06
MATN2	higher in all young	All young	All aged	33	33	31.6694	29.4835	2.18592	33	33	1.60103e-12
MATN3	higher in all young	All young	All aged	33	33	30.5911	26.704	3.88705	33	33	3.22353e-15
MFI2	higher in all young	All young	All aged	33	33	31.0475	29.5086	1.53895	33	33	2.26659e-05
MMP2	higher in all aged	All young	All aged	33	33	25.344	28.5413	-3.19727	20	32	1.17443e-07
NID2	higher in all young	All young	All aged	33	33	30.7308	29.1427	1.58813	33	33	4.41683e-08
ORM1	higher in all aged	All young	All aged	33	33	29.2913	33.902	-4.61077	32	33	1.96266e-12
PCOLCE	higher in all young	All young	All aged	33	33	32.8977	31.8977	1.00005	33	33	4.74108e-09
PFKP	higher in all young	All young	All aged	33	33	28.099	26.9915	1.10751	32	30	8.12742e-06
PGAM1	higher in all young	All young	All aged	33	33	29.217	27.9722	1.24482	33	30	2.36876e-09
PGM1	higher in all young	All young	All aged	33	33	28.7713	28.0029	0.768461	33	33	7.10535e-05
PKM	higher in all young	All young	All aged	33	33	32.3696	31.483	0.886594	33	33	7.6301e-05
PLG	higher in all aged	All young	All aged	33	33	24.8314	32.3452	-7.51382	27	33	2.18033e-14
POSTN	higher in all aged	All young	All aged	33	33	25.9673	29.8257	-3.8584	27	33	5.91609e-08
PRDX1	higher in all young	All young	All aged	33	33	30.3916	29.2001	1.19152	33	33	6.99005e-08
PRG4	higher in all aged	All young	All aged	33	33	32.4963	35.2932	-2.79684	33	33	4.8534e-08
PTRF	higher in all young	All young	All aged	33	33	30.0712	27.5687	2.50254	33	27	1.26137e-06
PYGB	higher in all young	All young	All aged	33	33	27.1605	26.239	0.92144	33	31	9.01891e-09
RBP4	higher in all aged	All young	All aged	33	33	28.0977	29.214	-1.11628	31	33	1.60469e-05
RCN1	higher in all young	All young	All aged	33	33	27.8409	26.6596	1.18124	29	26	5.33663e-06
RCN3	higher in all young	All young	All aged	33	33	30.333	28.7671	1.56587	33	33	8.39829e-09
RNASE4	higher in all young	All young	All aged	33	33	32.7987	31.5084	1.29026	33	33	2.87392e-06
S100A1	higher in all young	All young	All aged	33	33	29.5848	27.621	1.9638	32	32	1.32664e-08
SCUBE1	higher in all young	All young	All aged	33	33	28.5709	25.9146	2.65632	32	23	1.11029e-11
SERPINA1	higher in all aged	All young	All aged	33	33	34.124	35.6886	-1.56465	33	33	2.40065e-08
SERPINA3	higher in all aged	All young	All aged	33	33	32.1618	33.4949	-1.33311	33	33	2.17186e-07
SERPINA5	higher in all young	All young	All aged	33	33	33.378	31.9174	1.46065	33	33	7.96796e-05
SERPINC1	higher in all aged	All young	All aged	33	33	26.4852	32.4056	-5.92036	24	33	3.29717e-09
SERPIND1	higher in all aged	All young	All aged	33	33	24.2519	29.642	-5.39007	17	33	1.00301e-10
SERPINF1	higher in all aged	All young	All aged	33	33	27.5902	31.6575	-4.06733	26	33	2.10132e-06
SERPINF2	higher in all aged	All young	All aged	33	33	23.9011	29.1542	-5.25313	17	33	1.34099e-08
SLPI	higher in all young	All young	All aged	33	33	32.4829	30.3763	2.10658	31	27	3.87969e-06
SPARC	higher in all young	All young	All aged	33	33	30.6408	29.0886	1.55223	33	33	1.03393e-07
SPP1	higher in all young	All young	All aged	33	33	27.6049	26.0535	1.5514	31	22	7.93832e-08
SSC5D	higher in all young	All young	All aged	33	33	29.9575	27.839	2.1185	33	32	2.56143e-08
TF	higher in all aged	All young	All aged	33	33	33.0527	36.5769	-3.52415	33	33	1.18693e-15
TGFBI	higher in all young	All young	All aged	33	33	33.6862	32.9778	0.708388	33	33	0.000120416
THBS3	higher in all young	All young	All aged	33	33	30.4335	28.2489	2.18461	33	32	4.73721e-14
TIMP3	higher in all aged	All young	All aged	33	33	28.434	30.7048	-2.2708	28	33	9.72226e-07
TNC	higher in all young	All young	All aged	33	33	34.9744	32.6238	2.35064	33	33	4.59489e-06
TNXB	higher in all young	All young	All aged	33	33	34.1346	29.3517	4.78289	33	33	5.06062e-13
TPI1	higher in all young	All young	All aged	33	33	31.4047	30.2829	1.12179	33	33	4.34412e-06
TTR	higher in all aged	All young	All aged	33	33	27.4001	32.7308	-5.33069	20	33	9.58325e-10
TUBA1B	higher in all young	All young	All aged	33	33	29.3777	27.93	1.44776	33	33	4.11883e-05
UGP2	higher in all young	All young	All aged	33	33	28.7354	27.1761	1.55929	33	28	2.54181e-06
VASN	higher in all young	All young	All aged	33	33	26.8699	25.684	1.18596	24	24	8.38453e-06
VCAN	higher in all young	All young	All aged	33	33	36.9439	34.8096	2.13424	33	33	2.97759e-11
VIM	higher in all young	All young	All aged	33	33	34.7585	33.1482	1.6103	33	33	3.12437e-05
VTN	higher in all aged	All young	All aged	33	33	27.1575	33.5233	-6.3658	22	33	2.32998e-08
VWA1	higher in all young	All young	All aged	33	33	28.0957	27.2626	0.833089	28	32	2.33139e-05
XYLT1	higher in all young	All young	All aged	33	33	31.0059	29.2179	1.78793	33	32	7.68286e-07
YWHAE	higher in all young	All young	All aged	33	33	29.4082	28.4269	0.981267	33	33	5.86079e-05

## Sheet: Sheet4
gene	status	group1	group2	Num of samples in group1	Num of samples in group2	average log2(LFQ) in group1	average log2(LFQ) in group2	log2(Fold change)	Num of valid values in group1	Num of valid values in group2
AOC2	higher in young_OAF	young_OAF	aged_OAF	12	12	28.5938	24.5657	4.02805	12	5
APOC4	higher in young_OAF	young_OAF	aged_OAF	12	12	26.3532	24.2831	2.07007	1	3
CHAD	higher in young_OAF	young_OAF	aged_OAF	12	12	37.4368	35.0671	2.36971	12	12
CKM	higher in young_OAF	young_OAF	aged_OAF	12	12	32.2132	29.8304	2.38282	12	12
CLEC3A	higher in young_OAF	young_OAF	aged_OAF	12	12	34.2134	30.9003	3.31318	12	12
COL11A1	higher in young_OAF	young_OAF	aged_OAF	12	12	31.643	29.346	2.29703	12	12
COL14A1	higher in young_OAF	young_OAF	aged_OAF	12	12	34.0505	31.9885	2.06199	12	12
COL2A1	higher in young_OAF	young_OAF	aged_OAF	12	12	37.2721	34.5278	2.74423	12	12
COL9A1	higher in young_OAF	young_OAF	aged_OAF	12	12	29.2985	25.9422	3.35639	12	9
CPN2	higher in young_OAF	young_OAF	aged_OAF	12	12	28.2328	25.8982	2.3346	1	6
EMILIN3	higher in young_OAF	young_OAF	aged_OAF	12	12	29.4269	27.3433	2.08363	12	12
ENPP2	higher in young_OAF	young_OAF	aged_OAF	12	12	28.0498	26.0419	2.00793	11	9
ERAP1	higher in young_OAF	young_OAF	aged_OAF	12	12	27.3537	24.378	2.9757	1	2
FAM162A	higher in young_OAF	young_OAF	aged_OAF	12	12	26.748	24.2034	2.54457	1	3
HABP2	higher in young_OAF	young_OAF	aged_OAF	12	12	28.0598	25.6892	2.37058	1	11
HHIPL2	higher in young_OAF	young_OAF	aged_OAF	12	12	30.9469	28.5513	2.39562	12	12
IGHV5-51	higher in young_OAF	young_OAF	aged_OAF	12	12	28.3971	25.8756	2.52146	1	7
IGKV1-6	higher in young_OAF	young_OAF	aged_OAF	12	12	26.4701	23.0698	3.4003	1	2
IGKV4-1	higher in young_OAF	young_OAF	aged_OAF	12	12	29.5359	27.1384	2.39753	1	7
ITGAV	higher in young_OAF	young_OAF	aged_OAF	12	12	27.3645	24.9483	2.41613	11	10
KERA	higher in young_OAF	young_OAF	aged_OAF	12	12	28.3494	26.2732	2.07621	11	7
KRT5	higher in young_OAF	young_OAF	aged_OAF	12	12	26.1046	22.8966	3.20797	5	9
KRT6C	higher in young_OAF	young_OAF	aged_OAF	12	12	27.4185	25.1325	2.28605	4	4
LAMB2	higher in young_OAF	young_OAF	aged_OAF	12	12	30.3322	27.9342	2.39801	12	12
LANCL1	higher in young_OAF	young_OAF	aged_OAF	12	12	27.5829	24.6053	2.9776	1	1
LECT2	higher in young_OAF	young_OAF	aged_OAF	12	12	31.045	28.9897	2.0553	12	10
LMAN1	higher in young_OAF	young_OAF	aged_OAF	12	12	28.0637	26.0349	2.02876	1	9
LMAN2	higher in young_OAF	young_OAF	aged_OAF	12	12	29.9474	27.8153	2.132	2	4
LOXL2	higher in young_OAF	young_OAF	aged_OAF	12	12	30.0326	27.8991	2.13346	12	12
MATN3	higher in young_OAF	young_OAF	aged_OAF	12	12	28.9487	26.372	2.57673	12	12
NES	higher in young_OAF	young_OAF	aged_OAF	12	12	30.577	28.3509	2.22609	10	11
PIGR	higher in young_OAF	young_OAF	aged_OAF	12	12	29.0116	26.1599	2.85178	2	6
ROCK2	higher in young_OAF	young_OAF	aged_OAF	12	12	27.2475	25.0958	2.1517	1	3
SBSPON	higher in young_OAF	young_OAF	aged_OAF	12	12	27.1507	25.0448	2.10587	10	5
SERPINA7	higher in young_OAF	young_OAF	aged_OAF	12	12	28.0741	25.9702	2.10395	1	8
STXBP1	higher in young_OAF	young_OAF	aged_OAF	12	12	25.2628	23.1172	2.1456	1	1
TNMD	higher in young_OAF	young_OAF	aged_OAF	12	12	28.0323	25.4054	2.62689	9	6
TNXB	higher in young_OAF	young_OAF	aged_OAF	12	12	34.0191	31.7533	2.2658	12	12
VIT	higher in young_OAF	young_OAF	aged_OAF	12	12	28.7466	26.0054	2.74115	12	5
SEPT11	higher in aged_OAF	young_OAF	aged_OAF	12	12	25.9341	28.3071	-2.37304	9	6
A1BG	higher in aged_OAF	young_OAF	aged_OAF	12	12	26.4797	30.0816	-3.60191	10	12
A2M	higher in aged_OAF	young_OAF	aged_OAF	12	12	31.2502	33.52	-2.26976	12	12
AGL	higher in aged_OAF	young_OAF	aged_OAF	12	12	26.8357	29.3781	-2.54238	3	2
AK3	higher in aged_OAF	young_OAF	aged_OAF	12	12	24.9718	26.9879	-2.0161	1	3
AKAP12	higher in aged_OAF	young_OAF	aged_OAF	12	12	24.6304	26.6784	-2.04791	6	7
ANPEP	higher in aged_OAF	young_OAF	aged_OAF	12	12	24.2194	26.4602	-2.24081	1	9
APOA1	higher in aged_OAF	young_OAF	aged_OAF	12	12	31.5221	35.3515	-3.82941	12	12
APOA2	higher in aged_OAF	young_OAF	aged_OAF	12	12	27.4594	30.3739	-2.91449	8	12
APOB	higher in aged_OAF	young_OAF	aged_OAF	12	12	27.0333	31.9763	-4.94294	12	12
BASP1	higher in aged_OAF	young_OAF	aged_OAF	12	12	25.9089	27.95	-2.04107	5	7
BCAM	higher in aged_OAF	young_OAF	aged_OAF	12	12	23.8921	26.0162	-2.12412	1	5
C1QBP	higher in aged_OAF	young_OAF	aged_OAF	12	12	24.461	26.6134	-2.15239	7	6
C2	higher in aged_OAF	young_OAF	aged_OAF	12	12	25.3359	28.0684	-2.73243	10	11
C4BPA	higher in aged_OAF	young_OAF	aged_OAF	12	12	25.9285	29.8838	-3.95528	10	12
C5	higher in aged_OAF	young_OAF	aged_OAF	12	12	24.193	29.1538	-4.96075	12	12
C7	higher in aged_OAF	young_OAF	aged_OAF	12	12	26.2673	29.3865	-3.11916	5	12
C8A	higher in aged_OAF	young_OAF	aged_OAF	12	12	24.9777	28.7179	-3.74028	9	12
C8B	higher in aged_OAF	young_OAF	aged_OAF	12	12	24.62	29.25	-4.63001	11	12
C8G	higher in aged_OAF	young_OAF	aged_OAF	12	12	26.6101	29.3619	-2.75179	10	12
CAPN1	higher in aged_OAF	young_OAF	aged_OAF	12	12	23.4438	26.574	-3.13022	4	5
CAST	higher in aged_OAF	young_OAF	aged_OAF	12	12	25.1241	27.2219	-2.09785	6	6
CAT	higher in aged_OAF	young_OAF	aged_OAF	12	12	26.3823	28.7121	-2.32989	11	12
CCT6A	higher in aged_OAF	young_OAF	aged_OAF	12	12	24.1357	26.5782	-2.44252	4	6
CD163	higher in aged_OAF	young_OAF	aged_OAF	12	12	23.7912	26.23	-2.43881	7	7
CFH	higher in aged_OAF	young_OAF	aged_OAF	12	12	30.1908	32.5648	-2.37405	12	12
CFI	higher in aged_OAF	young_OAF	aged_OAF	12	12	25.855	28.5258	-2.67074	9	12
CKMT2	higher in aged_OAF	young_OAF	aged_OAF	12	12	23.962	27.6168	-3.65473	5	3
CPB2	higher in aged_OAF	young_OAF	aged_OAF	12	12	24.9726	27.8929	-2.92026	5	10
CRLF1	higher in aged_OAF	young_OAF	aged_OAF	12	12	24.1302	27.2083	-3.07812	3	10
DMD	higher in aged_OAF	young_OAF	aged_OAF	12	12	24.282	26.976	-2.694	2	3
ECM1	higher in aged_OAF	young_OAF	aged_OAF	12	12	26.2338	29.3361	-3.10225	10	12
EEF1A2	higher in aged_OAF	young_OAF	aged_OAF	12	12	25.9097	28.1257	-2.216	1	2
EIF2S1	higher in aged_OAF	young_OAF	aged_OAF	12	12	24.3141	27.0173	-2.70322	8	5
EPHX1	higher in aged_OAF	young_OAF	aged_OAF	12	12	25.3065	28.0323	-2.7258	1	5
ETFB	higher in aged_OAF	young_OAF	aged_OAF	12	12	24.703	27.1757	-2.47266	5	4
F12	higher in aged_OAF	young_OAF	aged_OAF	12	12	26.1359	28.2228	-2.08693	4	11
F2	higher in aged_OAF	young_OAF	aged_OAF	12	12	26.1509	30.0103	-3.8594	12	12
FABP4	higher in aged_OAF	young_OAF	aged_OAF	12	12	27.3615	29.991	-2.62948	10	11
FAM49B	higher in aged_OAF	young_OAF	aged_OAF	12	12	28.3745	30.7579	-2.3834	1	3
FGA	higher in aged_OAF	young_OAF	aged_OAF	12	12	29.7421	34.0245	-4.28238	12	12
FGB	higher in aged_OAF	young_OAF	aged_OAF	12	12	30.467	34.4891	-4.0221	12	12
FGG	higher in aged_OAF	young_OAF	aged_OAF	12	12	30.3768	34.668	-4.29126	12	12
FLNB	higher in aged_OAF	young_OAF	aged_OAF	12	12	26.3129	28.459	-2.14612	12	11
GC	higher in aged_OAF	young_OAF	aged_OAF	12	12	29.8114	31.9658	-2.1544	11	12
H3F3A	higher in aged_OAF	young_OAF	aged_OAF	12	12	27.0303	29.2597	-2.22941	5	9
HLA-DRA	higher in aged_OAF	young_OAF	aged_OAF	12	12	24.355	26.4687	-2.11367	4	9
HP	higher in aged_OAF	young_OAF	aged_OAF	12	12	29.812	33.4258	-3.61375	12	12
HPX	higher in aged_OAF	young_OAF	aged_OAF	12	12	30.1311	32.9776	-2.84648	12	12
HRG	higher in aged_OAF	young_OAF	aged_OAF	12	12	27.4966	30.2752	-2.77857	10	12
IGFALS	higher in aged_OAF	young_OAF	aged_OAF	12	12	24.1623	26.9188	-2.75654	5	11
IGHA1	higher in aged_OAF	young_OAF	aged_OAF	12	12	28.3714	31.2939	-2.92255	12	12
IGHG2	higher in aged_OAF	young_OAF	aged_OAF	12	12	29.0199	31.2042	-2.18433	12	12
IGHG3	higher in aged_OAF	young_OAF	aged_OAF	12	12	27.9973	30.1752	-2.17787	8	12
IGHG4	higher in aged_OAF	young_OAF	aged_OAF	12	12	27.2535	29.8094	-2.55588	7	10
IGLL5	higher in aged_OAF	young_OAF	aged_OAF	12	12	29.4647	31.6552	-2.19051	10	12
ITIH1	higher in aged_OAF	young_OAF	aged_OAF	12	12	28.9573	31.3971	-2.43982	12	12
ITIH2	higher in aged_OAF	young_OAF	aged_OAF	12	12	27.791	31.9992	-4.20823	11	12
ITIH3	higher in aged_OAF	young_OAF	aged_OAF	12	12	26.103	28.972	-2.86899	6	11
KLHL41	higher in aged_OAF	young_OAF	aged_OAF	12	12	23.5695	27.0761	-3.50658	4	3
KNG1	higher in aged_OAF	young_OAF	aged_OAF	12	12	28.2797	30.7848	-2.50506	11	12
LBP	higher in aged_OAF	young_OAF	aged_OAF	12	12	25.9211	28.6455	-2.72439	9	12
LMNB1	higher in aged_OAF	young_OAF	aged_OAF	12	12	23.9068	26.2774	-2.3706	4	8
LRG1	higher in aged_OAF	young_OAF	aged_OAF	12	12	26.1183	28.799	-2.68076	8	12
MYBPC2	higher in aged_OAF	young_OAF	aged_OAF	12	12	23.8435	26.0098	-2.16632	9	7
MYH4	higher in aged_OAF	young_OAF	aged_OAF	12	12	26.3012	29.702	-3.40081	5	3
MYOF	higher in aged_OAF	young_OAF	aged_OAF	12	12	26.353	28.6578	-2.3048	3	7
MYOM1	higher in aged_OAF	young_OAF	aged_OAF	12	12	22.3228	27.4446	-5.12181	7	4
MYOM3	higher in aged_OAF	young_OAF	aged_OAF	12	12	24.7448	26.7754	-2.03064	8	6
NAMPT	higher in aged_OAF	young_OAF	aged_OAF	12	12	24.7756	27.0479	-2.27228	2	4
OGDH	higher in aged_OAF	young_OAF	aged_OAF	12	12	23.8356	26.3404	-2.50475	3	5
ORM1	higher in aged_OAF	young_OAF	aged_OAF	12	12	31.5825	33.8003	-2.21775	12	12
ORM2	higher in aged_OAF	young_OAF	aged_OAF	12	12	29.2452	31.7212	-2.47608	11	12
PADI2	higher in aged_OAF	young_OAF	aged_OAF	12	12	24.3542	27.6393	-3.28505	1	2
PDHA1	higher in aged_OAF	young_OAF	aged_OAF	12	12	23.8052	25.9453	-2.14007	2	3
PGLYRP2	higher in aged_OAF	young_OAF	aged_OAF	12	12	25.8899	29.2641	-3.3742	7	12
PHPT1	higher in aged_OAF	young_OAF	aged_OAF	12	12	23.4586	25.9473	-2.48867	2	5
PLTP	higher in aged_OAF	young_OAF	aged_OAF	12	12	25.9876	28.4269	-2.43928	10	11
PODN	higher in aged_OAF	young_OAF	aged_OAF	12	12	24.4925	27.0449	-2.55238	2	6
PON1	higher in aged_OAF	young_OAF	aged_OAF	12	12	23.7654	28.2141	-4.44873	7	12
ROCK1	higher in aged_OAF	young_OAF	aged_OAF	12	12	25.3362	27.4638	-2.12758	2	3
S100A9	higher in aged_OAF	young_OAF	aged_OAF	12	12	26.5765	28.7504	-2.17389	11	12
SAA4	higher in aged_OAF	young_OAF	aged_OAF	12	12	25.7334	28.3046	-2.5712	1	8
SDHA	higher in aged_OAF	young_OAF	aged_OAF	12	12	24.4046	26.4053	-2.00066	1	5
SERPINA10	higher in aged_OAF	young_OAF	aged_OAF	12	12	24.3434	26.8729	-2.52954	4	11
SERPINA4	higher in aged_OAF	young_OAF	aged_OAF	12	12	25.5521	28.1033	-2.55119	8	12
SERPINC1	higher in aged_OAF	young_OAF	aged_OAF	12	12	29.0507	31.4145	-2.36384	12	12
SERPIND1	higher in aged_OAF	young_OAF	aged_OAF	12	12	24.4855	28.4668	-3.98131	7	12
SERPINF2	higher in aged_OAF	young_OAF	aged_OAF	12	12	24.3649	28.1231	-3.75823	9	12
SPON1	higher in aged_OAF	young_OAF	aged_OAF	12	12	24.6088	27.9635	-3.35468	6	10
SRL	higher in aged_OAF	young_OAF	aged_OAF	12	12	23.5125	26.3927	-2.8802	2	4
STIP1	higher in aged_OAF	young_OAF	aged_OAF	12	12	24.8051	26.9895	-2.18432	7	6
TCAP	higher in aged_OAF	young_OAF	aged_OAF	12	12	24.7599	27.28	-2.5201	1	2
TIMP3	higher in aged_OAF	young_OAF	aged_OAF	12	12	26.5446	29.3466	-2.80201	7	12
TMOD4	higher in aged_OAF	young_OAF	aged_OAF	12	12	24.758	27.8231	-3.06517	4	2
TNNI2	higher in aged_OAF	young_OAF	aged_OAF	12	12	25.1176	29.2503	-4.13267	7	3
TPSAB1	higher in aged_OAF	young_OAF	aged_OAF	12	12	25.162	27.7157	-2.55368	2	8
TTR	higher in aged_OAF	young_OAF	aged_OAF	12	12	29.1736	31.7457	-2.57211	11	12
UBXN10	higher in aged_OAF	young_OAF	aged_OAF	12	12	26.4043	28.5651	-2.16078	2	6
UQCRC1	higher in aged_OAF	young_OAF	aged_OAF	12	12	24.3729	26.6442	-2.27125	6	6
XIRP1	higher in aged_OAF	young_OAF	aged_OAF	12	12	25.4927	28.2783	-2.78556	1	8

## Sheet: Sheet5
gene	status	group1	group2	Num of samples in group1	Num of samples in group2	Num of valid values in group1	Num of valid values in group2
KAL1	exclusive in young_OAF	young_OAF	aged_OAF	12	12	10	0
SCUBE3	exclusive in young_OAF	young_OAF	aged_OAF	12	12	8	0
ATP6V1A	exclusive in aged_OAF	young_OAF	aged_OAF	12	12	0	7
BMP1	exclusive in aged_OAF	young_OAF	aged_OAF	12	12	0	8
GDF10	exclusive in aged_OAF	young_OAF	aged_OAF	12	12	0	10
HARS	exclusive in aged_OAF	young_OAF	aged_OAF	12	12	0	7
IGHV3-72	exclusive in aged_OAF	young_OAF	aged_OAF	12	12	0	7
IGKV1D-13	exclusive in aged_OAF	young_OAF	aged_OAF	12	12	0	8
IGKV3-20	exclusive in aged_OAF	young_OAF	aged_OAF	12	12	0	7
NTN1	exclusive in aged_OAF	young_OAF	aged_OAF	12	12	0	9
PPT1	exclusive in aged_OAF	young_OAF	aged_OAF	12	12	0	8
RNASE2	exclusive in aged_OAF	young_OAF	aged_OAF	12	12	0	8
S100A6	exclusive in aged_OAF	young_OAF	aged_OAF	12	12	0	9
SPP2	exclusive in aged_OAF	young_OAF	aged_OAF	12	12	0	8
SULF2	exclusive in aged_OAF	young_OAF	aged_OAF	12	12	0	10
TMEM198	exclusive in aged_OAF	young_OAF	aged_OAF	12	12	0	7
TPP1	exclusive in aged_OAF	young_OAF	aged_OAF	12	12	0	8
UNC80	exclusive in aged_OAF	young_OAF	aged_OAF	12	12	0	7
VDAC2	exclusive in aged_OAF	young_OAF	aged_OAF	12	12	0	7

## Sheet: Sheet6
gene	status	group1	group2	Num of samples in group1	Num of samples in group2	average log2(LFQ) in group1	average log2(LFQ) in group2	log2(Fold change)	Num of valid values in group1	Num of valid values in group2	p-value
ABI3BP	higher in young_OAF	young_OAF	aged_OAF	12	12	37.3776	34.7963	2.58129	12	12	4.3818e-05
AHSG	higher in aged_OAF	young_OAF	aged_OAF	12	12	27.6543	30.394	-2.7397	10	12	6.34197e-05
ANXA1	higher in young_OAF	young_OAF	aged_OAF	12	12	33.3966	32.2814	1.11518	12	12	1.86529e-06
ANXA4	higher in young_OAF	young_OAF	aged_OAF	12	12	32.2608	30.8371	1.42362	12	12	1.11527e-07
ANXA5	higher in young_OAF	young_OAF	aged_OAF	12	12	33.0915	32.0596	1.03186	12	12	8.41097e-06
APCS	higher in aged_OAF	young_OAF	aged_OAF	12	12	28.8972	32.6928	-3.7956	9	12	7.83619e-05
APOA4	higher in aged_OAF	young_OAF	aged_OAF	12	12	26.404	33.5094	-7.10538	12	12	3.01367e-07
APOE	higher in aged_OAF	young_OAF	aged_OAF	12	12	27.0932	32.3854	-5.29221	11	12	1.06376e-05
APOH	higher in aged_OAF	young_OAF	aged_OAF	12	12	29.8728	32.109	-2.23616	11	12	4.57965e-07
BGN	higher in young_OAF	young_OAF	aged_OAF	12	12	38.6915	37.1027	1.58874	12	12	2.19081e-08
C6	higher in aged_OAF	young_OAF	aged_OAF	12	12	25.4282	29.5048	-4.0766	12	12	6.53548e-06
C9	higher in aged_OAF	young_OAF	aged_OAF	12	12	26.9886	32.1515	-5.16284	11	12	2.1206e-05
COL11A2	higher in young_OAF	young_OAF	aged_OAF	12	12	34.6665	30.1173	4.5492	12	12	3.99974e-05
COL15A1	higher in young_OAF	young_OAF	aged_OAF	12	12	31.5408	29.7577	1.78312	12	12	1.04874e-06
COL1A1	higher in young_OAF	young_OAF	aged_OAF	12	12	35.6107	33.9685	1.64213	12	12	1.53706e-06
COL1A2	higher in young_OAF	young_OAF	aged_OAF	12	12	37.5814	36.0737	1.50768	12	12	8.57463e-07
COL5A2	higher in young_OAF	young_OAF	aged_OAF	12	12	29.6529	28.009	1.64394	12	11	1.71819e-05
COL6A1	higher in young_OAF	young_OAF	aged_OAF	12	12	38.0328	35.9503	2.08247	12	12	7.68973e-06
COL6A2	higher in young_OAF	young_OAF	aged_OAF	12	12	37.0675	35.1129	1.95456	12	12	1.88847e-06
COL6A3	higher in young_OAF	young_OAF	aged_OAF	12	12	39.0221	37.2571	1.76499	12	12	2.75054e-05
CTSD	higher in aged_OAF	young_OAF	aged_OAF	12	12	28.1855	29.8849	-1.69942	11	12	1.08802e-05
F13A1	higher in aged_OAF	young_OAF	aged_OAF	12	12	28.4404	30.6189	-2.17854	12	12	1.33088e-05
FBN1	higher in young_OAF	young_OAF	aged_OAF	12	12	33.0382	31.2999	1.73834	12	12	2.21825e-08
HAPLN3	higher in young_OAF	young_OAF	aged_OAF	12	12	31.5175	29.8359	1.68156	12	12	2.35138e-05
HSPG2	higher in young_OAF	young_OAF	aged_OAF	12	12	34.6688	33.8553	0.813475	12	12	2.49044e-05
IGHM	higher in aged_OAF	young_OAF	aged_OAF	12	12	25.3562	33.099	-7.74275	10	12	6.67286e-05
IL17B	higher in young_OAF	young_OAF	aged_OAF	12	12	28.8319	24.3309	4.50101	12	7	6.72605e-06
ITIH4	higher in aged_OAF	young_OAF	aged_OAF	12	12	25.7183	31.1185	-5.40014	11	12	7.28293e-05
LOX	higher in young_OAF	young_OAF	aged_OAF	12	12	30.9394	29.2499	1.68953	12	12	7.18156e-07
MMP2	higher in aged_OAF	young_OAF	aged_OAF	12	12	25.0242	29.1378	-4.11359	10	12	1.75132e-06
PLG	higher in aged_OAF	young_OAF	aged_OAF	12	12	26.425	32.2267	-5.80173	12	12	6.15548e-05
POSTN	higher in aged_OAF	young_OAF	aged_OAF	12	12	26.1605	31.2459	-5.0854	11	12	3.32816e-05
SPARC	higher in young_OAF	young_OAF	aged_OAF	12	12	31.2844	28.4954	2.78901	12	12	3.46608e-06
VCAN	higher in young_OAF	young_OAF	aged_OAF	12	12	36.6961	34.3141	2.38203	12	12	9.47198e-06
VTN	higher in aged_OAF	young_OAF	aged_OAF	12	12	29.9819	34.4534	-4.47147	12	12	7.07282e-06
VWA1	higher in young_OAF	young_OAF	aged_OAF	12	12	28.7237	27.6092	1.11444	12	12	2.87214e-06

## Sheet: Sheet7
gene	status	group1	group2	Num of samples in group1	Num of samples in group2	average log2(LFQ) in group1	average log2(LFQ) in group2	log2(Fold change)	Num of valid values in group1	Num of valid values in group2
ADD3	higher in young inner disc	young inner disc	aged inner disc	21	21	27.1455	24.9512	2.19427	3	3
ALDOC	higher in young inner disc	young inner disc	aged inner disc	21	21	28.2298	26.2286	2.00119	20	8
ANP32A	higher in young inner disc	young inner disc	aged inner disc	21	21	26.8539	24.5824	2.27145	2	1
ARHGDIB	higher in young inner disc	young inner disc	aged inner disc	21	21	26.6323	24.1308	2.50152	2	3
CA3	higher in young inner disc	young inner disc	aged inner disc	21	21	27.8919	24.4479	3.44402	20	10
CASQ1	higher in young inner disc	young inner disc	aged inner disc	21	21	26.7659	24.2343	2.53164	8	2
CCT4	higher in young inner disc	young inner disc	aged inner disc	21	21	25.9618	23.827	2.13474	3	4
COL8A1	higher in young inner disc	young inner disc	aged inner disc	21	21	27.4892	25.4243	2.06497	19	10
COL9A1	higher in young inner disc	young inner disc	aged inner disc	21	21	30.2632	26.731	3.53215	21	7
COL9A3	higher in young inner disc	young inner disc	aged inner disc	21	21	27.943	24.3437	3.59927	3	1
DSP	higher in young inner disc	young inner disc	aged inner disc	21	21	32.1436	28.9667	3.1769	1	1
ENO3	higher in young inner disc	young inner disc	aged inner disc	21	21	26.4604	23.3596	3.10072	19	4
FAM129B	higher in young inner disc	young inner disc	aged inner disc	21	21	26.8466	24.5162	2.33042	1	4
HIST1H1B	higher in young inner disc	young inner disc	aged inner disc	21	21	27.9747	25.5953	2.37934	18	5
HK1	higher in young inner disc	young inner disc	aged inner disc	21	21	29.3699	27.2977	2.0722	1	1
HNRNPU	higher in young inner disc	young inner disc	aged inner disc	21	21	25.6453	23.0347	2.61063	4	1
HYAL1	higher in young inner disc	young inner disc	aged inner disc	21	21	27.4571	25.2747	2.18239	1	7
IGLV6-57	higher in young inner disc	young inner disc	aged inner disc	21	21	29.138	26.685	2.45302	1	12
ITGAV	higher in young inner disc	young inner disc	aged inner disc	21	21	28.1012	25.9423	2.15886	12	11
KAL1	higher in young inner disc	young inner disc	aged inner disc	21	21	28.8522	25.8216	3.03068	21	6
LCP1	higher in young inner disc	young inner disc	aged inner disc	21	21	27.9044	25.7041	2.20031	3	16
LPL	higher in young inner disc	young inner disc	aged inner disc	21	21	28.2337	26.165	2.06874	21	8
MB	higher in young inner disc	young inner disc	aged inner disc	21	21	29.3754	26.4235	2.95183	19	10
MDH2	higher in young inner disc	young inner disc	aged inner disc	21	21	26.1004	24.0758	2.02463	14	5
MECP2	higher in young inner disc	young inner disc	aged inner disc	21	21	28.8251	25.7614	3.06367	1	4
MRC1	higher in young inner disc	young inner disc	aged inner disc	21	21	27.9379	25.4261	2.51176	1	5
MYH2	higher in young inner disc	young inner disc	aged inner disc	21	21	26.3071	23.3644	2.94268	21	20
MYL2	higher in young inner disc	young inner disc	aged inner disc	21	21	27.665	25.3153	2.34966	18	9
MYL3	higher in young inner disc	young inner disc	aged inner disc	21	21	27.9151	24.6133	3.30179	12	9
MYLPF	higher in young inner disc	young inner disc	aged inner disc	21	21	26.876	23.597	3.27903	17	10
MYOZ1	higher in young inner disc	young inner disc	aged inner disc	21	21	26.2913	24.04	2.2513	3	3
PDLIM5	higher in young inner disc	young inner disc	aged inner disc	21	21	26.101	23.9	2.201	3	1
PHB	higher in young inner disc	young inner disc	aged inner disc	21	21	25.5081	23.0044	2.50367	3	1
RPS11	higher in young inner disc	young inner disc	aged inner disc	21	21	26.3284	23.4758	2.85257	3	1
RPS19	higher in young inner disc	young inner disc	aged inner disc	21	21	27.7729	25.543	2.22989	7	5
SLC25A4	higher in young inner disc	young inner disc	aged inner disc	21	21	25.1806	23.0432	2.13735	4	1
SLIT3	higher in young inner disc	young inner disc	aged inner disc	21	21	28.002	24.9034	3.0986	21	7
SRPX	higher in young inner disc	young inner disc	aged inner disc	21	21	27.6174	24.1789	3.43858	20	2
SYNCRIP	higher in young inner disc	young inner disc	aged inner disc	21	21	25.6291	23.3496	2.27948	3	4
TNNC1	higher in young inner disc	young inner disc	aged inner disc	21	21	27.1272	25.0885	2.03871	12	4
TNNC2	higher in young inner disc	young inner disc	aged inner disc	21	21	26.162	23.3091	2.85286	15	8
TNNT1	higher in young inner disc	young inner disc	aged inner disc	21	21	25.4697	23.2337	2.23596	6	5
TNNT3	higher in young inner disc	young inner disc	aged inner disc	21	21	25.2431	22.4711	2.77195	14	13
TPM1	higher in young inner disc	young inner disc	aged inner disc	21	21	27.3071	24.6672	2.63987	15	10
VIT	higher in young inner disc	young inner disc	aged inner disc	21	21	30.7762	25.9452	4.83099	21	7
A1BG	higher in aged inner disc	young inner disc	aged inner disc	21	21	22.6314	31.0143	-8.38298	6	21
AHSG	higher in aged inner disc	young inner disc	aged inner disc	21	21	26.0918	31.6459	-5.55413	4	21
AKR1C1	higher in aged inner disc	young inner disc	aged inner disc	21	21	25.4713	27.5851	-2.1138	1	2
AKR1C3	higher in aged inner disc	young inner disc	aged inner disc	21	21	24.106	26.8606	-2.75465	2	2
AMBP	higher in aged inner disc	young inner disc	aged inner disc	21	21	25.4269	30.8429	-5.41601	10	21
APCS	higher in aged inner disc	young inner disc	aged inner disc	21	21	27.1217	32.1046	-4.98284	2	21
APOC1	higher in aged inner disc	young inner disc	aged inner disc	21	21	26.0861	30.6542	-4.56803	4	19
APOC2	higher in aged inner disc	young inner disc	aged inner disc	21	21	23.8466	26.2905	-2.44394	1	5
APOC3	higher in aged inner disc	young inner disc	aged inner disc	21	21	24.5883	29.4899	-4.90152	2	17
APOM	higher in aged inner disc	young inner disc	aged inner disc	21	21	26.391	28.569	-2.178	2	14
BPIFB1	higher in aged inner disc	young inner disc	aged inner disc	21	21	24.5291	27.7415	-3.2124	1	1
BTD	higher in aged inner disc	young inner disc	aged inner disc	21	21	25.507	27.7881	-2.28104	8	14
C1QB	higher in aged inner disc	young inner disc	aged inner disc	21	21	25.7001	28.0854	-2.38534	1	14
C4A	higher in aged inner disc	young inner disc	aged inner disc	21	21	27.4091	30.1053	-2.69621	1	12
C4BPA	higher in aged inner disc	young inner disc	aged inner disc	21	21	23.7619	29.6119	-5.84997	10	20
C8A	higher in aged inner disc	young inner disc	aged inner disc	21	21	21.9354	29.9734	-8.03803	8	21
C8G	higher in aged inner disc	young inner disc	aged inner disc	21	21	23.9908	30.2734	-6.28258	6	21
CD14	higher in aged inner disc	young inner disc	aged inner disc	21	21	24.9571	28.1468	-3.18968	2	19
CD5L	higher in aged inner disc	young inner disc	aged inner disc	21	21	25.887	29.5687	-3.68164	6	15
CFHR1	higher in aged inner disc	young inner disc	aged inner disc	21	21	25.2154	29.2245	-4.00906	4	16
CFI	higher in aged inner disc	young inner disc	aged inner disc	21	21	25.9626	30.0965	-4.1339	10	21
CPB2	higher in aged inner disc	young inner disc	aged inner disc	21	21	24.5766	29.5337	-4.9571	4	15
CRLF1	higher in aged inner disc	young inner disc	aged inner disc	21	21	25.4646	27.9937	-2.52916	5	21
CRP	higher in aged inner disc	young inner disc	aged inner disc	21	21	24.4352	30.1285	-5.69327	1	12
EPYC	higher in aged inner disc	young inner disc	aged inner disc	21	21	25.3029	29.5587	-4.25583	8	21
F11	higher in aged inner disc	young inner disc	aged inner disc	21	21	24.5935	26.6704	-2.07692	1	13
F12	higher in aged inner disc	young inner disc	aged inner disc	21	21	26.0849	29.5001	-3.41519	3	19
GC	higher in aged inner disc	young inner disc	aged inner disc	21	21	24.6845	33.0345	-8.34995	9	21
GPLD1	higher in aged inner disc	young inner disc	aged inner disc	21	21	23.9157	27.5396	-3.62395	2	17
HPR	higher in aged inner disc	young inner disc	aged inner disc	21	21	25.5005	28.2796	-2.77917	4	17
HRG	higher in aged inner disc	young inner disc	aged inner disc	21	21	23.6592	31.4286	-7.76934	10	21
HUWE1	higher in aged inner disc	young inner disc	aged inner disc	21	21	27.4571	29.538	-2.0809	3	1
IGFALS	higher in aged inner disc	young inner disc	aged inner disc	21	21	24.3473	29.1328	-4.7855	6	15
IGFBP6	higher in aged inner disc	young inner disc	aged inner disc	21	21	23.2088	25.2802	-2.07138	1	8
IGHD	higher in aged inner disc	young inner disc	aged inner disc	21	21	25.635	29.4612	-3.82618	4	17
IGHG3	higher in aged inner disc	young inner disc	aged inner disc	21	21	25.1793	31.7281	-6.54886	6	21
IGHG4	higher in aged inner disc	young inner disc	aged inner disc	21	21	25.7105	30.1461	-4.43557	1	19
IGHM	higher in aged inner disc	young inner disc	aged inner disc	21	21	22.7839	33.3777	-10.5939	6	21
IGJ	higher in aged inner disc	young inner disc	aged inner disc	21	21	26.8956	30.0018	-3.10621	7	19
IGKV3-20	higher in aged inner disc	young inner disc	aged inner disc	21	21	25.4355	30.2328	-4.79733	1	16
IGKV4-1	higher in aged inner disc	young inner disc	aged inner disc	21	21	26.0807	29.4142	-3.33351	1	11
ITIH1	higher in aged inner disc	young inner disc	aged inner disc	21	21	22.6581	30.7527	-8.09461	10	21
ITIH3	higher in aged inner disc	young inner disc	aged inner disc	21	21	25.1034	27.9109	-2.80746	5	19
KLKB1	higher in aged inner disc	young inner disc	aged inner disc	21	21	24.945	28.9579	-4.0129	10	18
KNG1	higher in aged inner disc	young inner disc	aged inner disc	21	21	26.0464	32.2274	-6.18109	2	21
LBP	higher in aged inner disc	young inner disc	aged inner disc	21	21	24.7591	29.5599	-4.80077	3	19
LGALS3BP	higher in aged inner disc	young inner disc	aged inner disc	21	21	24.8495	29.1684	-4.31883	6	12
LRG1	higher in aged inner disc	young inner disc	aged inner disc	21	21	23.976	29.6482	-5.67221	2	19
MMP2	higher in aged inner disc	young inner disc	aged inner disc	21	21	25.6639	28.1834	-2.51955	10	20
MST1	higher in aged inner disc	young inner disc	aged inner disc	21	21	24.9428	27.0917	-2.14885	2	13
ORM2	higher in aged inner disc	young inner disc	aged inner disc	21	21	26.4333	32.2555	-5.8222	4	21
P0DOX2	higher in aged inner disc	young inner disc	aged inner disc	21	21	26.7924	30.758	-3.96559	3	19
PAPOLA	higher in aged inner disc	young inner disc	aged inner disc	21	21	30.6979	32.9635	-2.26562	13	21
PGLYRP2	higher in aged inner disc	young inner disc	aged inner disc	21	21	24.0596	30.3861	-6.32653	9	19
PON1	higher in aged inner disc	young inner disc	aged inner disc	21	21	22.7521	30.1429	-7.39076	6	17
RPL11	higher in aged inner disc	young inner disc	aged inner disc	21	21	22.759	25.3065	-2.5475	1	5
SAA4	higher in aged inner disc	young inner disc	aged inner disc	21	21	25.333	30.0726	-4.7396	2	11
SEMA3A	higher in aged inner disc	young inner disc	aged inner disc	21	21	26.4979	29.3666	-2.86869	7	21
SERPINA10	higher in aged inner disc	young inner disc	aged inner disc	21	21	25.5716	28.3131	-2.74145	1	14
SERPINA4	higher in aged inner disc	young inner disc	aged inner disc	21	21	24.2713	30.4695	-6.19816	4	21
SERPINA6	higher in aged inner disc	young inner disc	aged inner disc	21	21	25.7589	28.9618	-3.20284	9	20
SERPINA7	higher in aged inner disc	young inner disc	aged inner disc	21	21	24.8669	28.1842	-3.3173	1	14
SERPIND1	higher in aged inner disc	young inner disc	aged inner disc	21	21	24.0885	30.3136	-6.22509	10	21
SERPINF2	higher in aged inner disc	young inner disc	aged inner disc	21	21	23.3793	29.7434	-6.36411	8	21
SHBG	higher in aged inner disc	young inner disc	aged inner disc	21	21	24.8759	27.4537	-2.57781	1	16
TNFAIP6	higher in aged inner disc	young inner disc	aged inner disc	21	21	26.6859	30.6125	-3.92663	9	21
TTR	higher in aged inner disc	young inner disc	aged inner disc	21	21	25.2325	33.2937	-8.06123	9	21
VTN	higher in aged inner disc	young inner disc	aged inner disc	21	21	23.7683	32.9919	-9.22358	10	21

## Sheet: Sheet8
gene	status	group1	group2	Num of samples in group1	Num of samples in group2	Num of valid values in group1	Num of valid values in group2
BMP3	exclusive in young inner disc	young inner disc	aged inner disc	21	21	17	0
CLSTN2	exclusive in young inner disc	young inner disc	aged inner disc	21	21	16	0
ANPEP	exclusive in aged inner disc	young inner disc	aged inner disc	21	21	0	12
APOA2	exclusive in aged inner disc	young inner disc	aged inner disc	21	21	0	19
ARID1A	exclusive in aged inner disc	young inner disc	aged inner disc	21	21	0	18
C1QA	exclusive in aged inner disc	young inner disc	aged inner disc	21	21	0	11
CFHR2	exclusive in aged inner disc	young inner disc	aged inner disc	21	21	0	13
CFP	exclusive in aged inner disc	young inner disc	aged inner disc	21	21	0	11
DEFA3	exclusive in aged inner disc	young inner disc	aged inner disc	21	21	0	11
F13B	exclusive in aged inner disc	young inner disc	aged inner disc	21	21	0	16
F9	exclusive in aged inner disc	young inner disc	aged inner disc	21	21	0	15
FAP	exclusive in aged inner disc	young inner disc	aged inner disc	21	21	0	14
GALNT16	exclusive in aged inner disc	young inner disc	aged inner disc	21	21	0	13
HABP2	exclusive in aged inner disc	young inner disc	aged inner disc	21	21	0	16
HGFAC	exclusive in aged inner disc	young inner disc	aged inner disc	21	21	0	11
HOXD1	exclusive in aged inner disc	young inner disc	aged inner disc	21	21	0	14
IGHV1-2	exclusive in aged inner disc	young inner disc	aged inner disc	21	21	0	13
IGHV3-72	exclusive in aged inner disc	young inner disc	aged inner disc	21	21	0	14
IGHV4-61	exclusive in aged inner disc	young inner disc	aged inner disc	21	21	0	15
IGKV1-33	exclusive in aged inner disc	young inner disc	aged inner disc	21	21	0	11
IGKV1D-13	exclusive in aged inner disc	young inner disc	aged inner disc	21	21	0	11
IL1RAP	exclusive in aged inner disc	young inner disc	aged inner disc	21	21	0	13
LTBP1	exclusive in aged inner disc	young inner disc	aged inner disc	21	21	0	20
MASP2	exclusive in aged inner disc	young inner disc	aged inner disc	21	21	0	11
MFAP4	exclusive in aged inner disc	young inner disc	aged inner disc	21	21	0	11
PTGDS	exclusive in aged inner disc	young inner disc	aged inner disc	21	21	0	11
UBXN10	exclusive in aged inner disc	young inner disc	aged inner disc	21	21	0	13
IGHV3-7	exclusive in aged inner disc	young inner disc	aged inner disc	21	21	0	13
IGLV3-21	exclusive in aged inner disc	young inner disc	aged inner disc	21	21	0	13

## Sheet: Sheet9
gene	status	group1	group2	Num of samples in group1	Num of samples in group2	average log2(LFQ) in group1	average log2(LFQ) in group2	log2(Fold change)	Num of valid values in group1	Num of valid values in group2	p-value
A2M	higher in aged inner disc	young inner disc	aged inner disc	21	21	32.4907	35.4993	-3.00862	21	21	3.28973e-13
ABI3BP	higher in young inner disc	young inner disc	aged inner disc	21	21	37.2708	35.6088	1.66192	21	21	1.06701e-07
ACAN	higher in young inner disc	young inner disc	aged inner disc	21	21	39.6037	38.3939	1.20977	21	21	4.56038e-05
ACTA2	higher in young inner disc	young inner disc	aged inner disc	21	21	32.0178	30.3345	1.68335	21	21	3.17028e-08
ACTN1	higher in young inner disc	young inner disc	aged inner disc	21	21	26.2669	24.7579	1.50898	18	17	0.000201226
AFM	higher in aged inner disc	young inner disc	aged inner disc	21	21	24.7829	29.8003	-5.01738	11	21	3.60254e-09
AGT	higher in aged inner disc	young inner disc	aged inner disc	21	21	29.3323	30.5889	-1.2566	21	21	0.000185632
AHNAK	higher in young inner disc	young inner disc	aged inner disc	21	21	28.9838	26.9642	2.0196	21	21	3.63132e-06
ALB	higher in aged inner disc	young inner disc	aged inner disc	21	21	34.0834	39.1956	-5.11221	21	21	1.91845e-14
ALDOA	higher in young inner disc	young inner disc	aged inner disc	21	21	29.9328	28.1461	1.78663	21	21	1.08315e-07
ANG	higher in young inner disc	young inner disc	aged inner disc	21	21	33.8839	32.197	1.68688	21	21	5.55762e-07
ANGPTL2	higher in aged inner disc	young inner disc	aged inner disc	21	21	30.3585	31.2704	-0.911867	21	21	3.19376e-08
ANXA1	higher in young inner disc	young inner disc	aged inner disc	21	21	32.4931	30.7249	1.76821	21	21	1.15576e-10
ANXA2	higher in young inner disc	young inner disc	aged inner disc	21	21	33.2206	31.0836	2.13692	21	21	6.14923e-14
ANXA4	higher in young inner disc	young inner disc	aged inner disc	21	21	31.0284	28.7627	2.26568	21	21	1.89391e-08
ANXA5	higher in young inner disc	young inner disc	aged inner disc	21	21	31.8352	30.8753	0.959924	21	21	2.681e-06
ANXA6	higher in young inner disc	young inner disc	aged inner disc	21	21	29.1339	27.7797	1.35421	21	21	8.49981e-07
APOA1	higher in aged inner disc	young inner disc	aged inner disc	21	21	27.1185	36.2097	-9.0912	21	21	4.76873e-16
APOA4	higher in aged inner disc	young inner disc	aged inner disc	21	21	24.4	33.9455	-9.54555	20	21	7.52526e-20
APOB	higher in aged inner disc	young inner disc	aged inner disc	21	21	25.5174	31.2276	-5.71017	21	21	3.92651e-06
APOD	higher in young inner disc	young inner disc	aged inner disc	21	21	33.9873	33.0571	0.930143	21	21	9.6517e-05
APOE	higher in aged inner disc	young inner disc	aged inner disc	21	21	27.103	31.7521	-4.64901	20	21	1.01517e-06
APOH	higher in aged inner disc	young inner disc	aged inner disc	21	21	28.2938	32.9477	-4.6539	15	21	6.99349e-12
ASPN	higher in young inner disc	young inner disc	aged inner disc	21	21	31.6851	29.7961	1.88904	21	21	4.52501e-11
ATP5A1	higher in young inner disc	young inner disc	aged inner disc	21	21	27.167	25.2591	1.90789	16	19	0.000241231
ATRN	higher in young inner disc	young inner disc	aged inner disc	21	21	28.8181	27.4634	1.35465	21	18	1.63692e-08
AZGP1	higher in aged inner disc	young inner disc	aged inner disc	21	21	26.5809	30.9153	-4.33447	17	21	1.51651e-11
BGN	higher in young inner disc	young inner disc	aged inner disc	21	21	37.2399	35.9599	1.27999	21	21	3.52966e-05
C2	higher in aged inner disc	young inner disc	aged inner disc	21	21	25.2086	28.9977	-3.7891	14	21	7.84675e-07
C3	higher in aged inner disc	young inner disc	aged inner disc	21	21	33.3842	35.9283	-2.54406	21	21	1.17755e-09
C4B	higher in aged inner disc	young inner disc	aged inner disc	21	21	31.0723	33.0058	-1.9335	21	21	5.48765e-05
C5	higher in aged inner disc	young inner disc	aged inner disc	21	21	22.7582	30.0696	-7.31136	17	21	1.81168e-07
C6	higher in aged inner disc	young inner disc	aged inner disc	21	21	25.8485	30.6927	-4.84417	18	21	2.37661e-09
C7	higher in aged inner disc	young inner disc	aged inner disc	21	21	25.8017	30.7507	-4.94898	14	21	1.18302e-07
C8B	higher in aged inner disc	young inner disc	aged inner disc	21	21	24.2171	30.8497	-6.63263	15	21	3.09397e-11
C9	higher in aged inner disc	young inner disc	aged inner disc	21	21	23.3982	32.6218	-9.22361	17	21	8.60608e-16
CALM3	higher in young inner disc	young inner disc	aged inner disc	21	21	29.3054	27.9346	1.37087	19	18	1.98267e-07
CALU	higher in young inner disc	young inner disc	aged inner disc	21	21	29.7745	27.4502	2.32432	21	20	4.49562e-09
CAPS	higher in young inner disc	young inner disc	aged inner disc	21	21	29.9512	28.446	1.50519	21	21	4.95522e-06
CCDC80	higher in aged inner disc	young inner disc	aged inner disc	21	21	32.5221	33.5075	-0.985405	21	21	6.04517e-07
CCL18	higher in young inner disc	young inner disc	aged inner disc	21	21	29.5147	27.6422	1.8725	21	13	5.24449e-07
CD109	higher in young inner disc	young inner disc	aged inner disc	21	21	32.5806	30.4517	2.12893	21	21	3.16709e-13
CDH1	higher in young inner disc	young inner disc	aged inner disc	21	21	30.0057	28.6927	1.31306	21	21	8.39258e-05
CFB	higher in aged inner disc	young inner disc	aged inner disc	21	21	32.008	33.3511	-1.34315	21	21	4.04718e-05
CFD	higher in aged inner disc	young inner disc	aged inner disc	21	21	27.5555	28.9181	-1.36265	19	21	3.00857e-06
CFH	higher in aged inner disc	young inner disc	aged inner disc	21	21	31.0026	32.9527	-1.95008	21	21	2.84304e-05
CHAD	higher in young inner disc	young inner disc	aged inner disc	21	21	37.5115	35.7812	1.73032	21	21	3.33266e-07
CHADL	higher in young inner disc	young inner disc	aged inner disc	21	21	28.3652	27.2101	1.15511	21	21	4.67543e-08
CHRDL2	higher in young inner disc	young inner disc	aged inner disc	21	21	31.1839	28.432	2.75183	21	21	1.45621e-06
CHST14	higher in young inner disc	young inner disc	aged inner disc	21	21	26.9841	25.8015	1.18261	16	18	3.86823e-06
CKB	higher in young inner disc	young inner disc	aged inner disc	21	21	28.8339	26.9466	1.88731	21	16	6.93734e-07
CKM	higher in young inner disc	young inner disc	aged inner disc	21	21	30.7883	26.7393	4.04895	21	19	1.4103e-11
CLEC11A	higher in aged inner disc	young inner disc	aged inner disc	21	21	29.8292	30.693	-0.8638	21	21	9.87989e-05
CLEC3A	higher in young inner disc	young inner disc	aged inner disc	21	21	34.2121	30.6168	3.59526	21	21	2.06005e-09
CLEC3B	higher in young inner disc	young inner disc	aged inner disc	21	21	31.2601	30.0746	1.18558	21	21	2.20072e-05
CLSTN1	higher in young inner disc	young inner disc	aged inner disc	21	21	29.1871	27.4963	1.69083	21	19	2.27553e-07
CLU	higher in aged inner disc	young inner disc	aged inner disc	21	21	36.3309	37.8826	-1.5517	21	21	4.77144e-15
COL11A1	higher in young inner disc	young inner disc	aged inner disc	21	21	33.0836	30.3958	2.68786	21	21	1.93421e-12
COL11A2	higher in young inner disc	young inner disc	aged inner disc	21	21	35.8379	31.5157	4.32217	21	21	4.17604e-17
COL12A1	higher in young inner disc	young inner disc	aged inner disc	21	21	32.2895	29.4571	2.83247	21	21	1.33805e-09
COL14A1	higher in young inner disc	young inner disc	aged inner disc	21	21	31.0895	27.5966	3.49297	21	21	4.77061e-08
COL15A1	higher in young inner disc	young inner disc	aged inner disc	21	21	31.2048	28.4654	2.73938	21	21	2.26268e-11
COL1A2	higher in young inner disc	young inner disc	aged inner disc	21	21	37.21	35.394	1.816	21	21	2.69823e-10
COL2A1	higher in young inner disc	young inner disc	aged inner disc	21	21	38.037	34.793	3.244	21	21	6.1525e-10
COL3A1	higher in young inner disc	young inner disc	aged inner disc	21	21	32.1897	29.2172	2.97248	21	21	9.56702e-13
COL5A1	higher in young inner disc	young inner disc	aged inner disc	21	21	31.671	28.9765	2.69454	21	21	4.853e-15
COL5A2	higher in young inner disc	young inner disc	aged inner disc	21	21	31.4018	27.6358	3.76598	21	21	1.20842e-13
COL6A1	higher in young inner disc	young inner disc	aged inner disc	21	21	35.9962	33.8019	2.19431	21	21	2.42208e-13
COL6A2	higher in young inner disc	young inner disc	aged inner disc	21	21	35.4483	32.8068	2.6415	21	21	1.19805e-14
COL6A3	higher in young inner disc	young inner disc	aged inner disc	21	21	37.4058	35.1478	2.25802	21	21	9.93044e-17
CRYAB	higher in young inner disc	young inner disc	aged inner disc	21	21	28.7555	27.2008	1.55463	20	21	2.13525e-06
CSPG4	higher in young inner disc	young inner disc	aged inner disc	21	21	32.0948	30.9914	1.10348	21	21	6.42241e-07
CTSD	higher in aged inner disc	young inner disc	aged inner disc	21	21	26.6812	27.9085	-1.22731	12	21	5.4904e-05
CXCL12	higher in young inner disc	young inner disc	aged inner disc	21	21	29.8784	27.9982	1.88019	21	19	1.63024e-08
CYTL1	higher in young inner disc	young inner disc	aged inner disc	21	21	31.1668	29.4589	1.7079	21	21	7.40832e-10
DKK3	higher in young inner disc	young inner disc	aged inner disc	21	21	29.2389	27.9325	1.30637	21	20	3.77117e-06
DPYSL2	higher in young inner disc	young inner disc	aged inner disc	21	21	26.5074	24.6015	1.90582	19	16	8.53818e-06
DSC3	higher in young inner disc	young inner disc	aged inner disc	21	21	28.7376	26.7589	1.97866	20	17	2.08412e-07
DSTN	higher in young inner disc	young inner disc	aged inner disc	21	21	27.7342	26.2952	1.43895	21	14	0.000183067
ECM1	higher in aged inner disc	young inner disc	aged inner disc	21	21	27.4577	30.5639	-3.10623	18	21	1.59686e-11
ECM2	higher in young inner disc	young inner disc	aged inner disc	21	21	28.8185	27.2653	1.55319	21	21	3.62935e-09
EDIL3	higher in young inner disc	young inner disc	aged inner disc	21	21	31.8043	30.7764	1.02788	21	21	2.45604e-06
EEF1A1	higher in young inner disc	young inner disc	aged inner disc	21	21	29.4816	28.1966	1.28499	21	21	2.01333e-06
EHD2	higher in young inner disc	young inner disc	aged inner disc	21	21	28.2551	25.6453	2.60974	21	16	4.9691e-06
EMILIN1	higher in young inner disc	young inner disc	aged inner disc	21	21	31.1212	29.8314	1.28985	21	21	1.04438e-08
EMILIN3	higher in young inner disc	young inner disc	aged inner disc	21	21	30.4664	27.3703	3.0961	21	17	1.47874e-06
ENO1	higher in young inner disc	young inner disc	aged inner disc	21	21	33.0285	32.2173	0.811129	21	21	9.94575e-06
ENPP2	higher in young inner disc	young inner disc	aged inner disc	21	21	29.8835	26.0774	3.80605	21	20	1.37733e-12
F13A1	higher in aged inner disc	young inner disc	aged inner disc	21	21	26.8312	30.3605	-3.5293	21	21	3.24739e-09
F2	higher in aged inner disc	young inner disc	aged inner disc	21	21	23.5651	30.7976	-7.23252	18	21	2.39796e-12
FABP3	higher in young inner disc	young inner disc	aged inner disc	21	21	28.0443	26.0402	2.00407	12	13	3.2455e-05
FBN1	higher in young inner disc	young inner disc	aged inner disc	21	21	32.1213	29.5916	2.52977	21	21	3.43384e-12
FGA	higher in aged inner disc	young inner disc	aged inner disc	21	21	25.3137	33.4668	-8.15315	21	21	4.68857e-11
FGB	higher in aged inner disc	young inner disc	aged inner disc	21	21	25.9464	34.0659	-8.11943	21	21	1.10964e-11
FGFBP2	higher in young inner disc	young inner disc	aged inner disc	21	21	33.5001	32.3947	1.10542	21	21	0.000109848
FGG	higher in aged inner disc	young inner disc	aged inner disc	21	21	25.9037	34.4525	-8.54876	20	21	1.44083e-13
FHL1	higher in young inner disc	young inner disc	aged inner disc	21	21	29.1612	26.7895	2.37169	21	14	6.17237e-06
FN1	higher in aged inner disc	young inner disc	aged inner disc	21	21	38.7192	40.3412	-1.62201	21	21	2.1117e-11
FNDC1	higher in young inner disc	young inner disc	aged inner disc	21	21	32.6411	30.0473	2.59378	21	21	6.32228e-15
FRZB	higher in young inner disc	young inner disc	aged inner disc	21	21	31.1158	28.2627	2.85307	21	16	6.14998e-09
GAPDH	higher in young inner disc	young inner disc	aged inner disc	21	21	32.086	31.0627	1.02332	21	21	1.91486e-06
GNB1	higher in young inner disc	young inner disc	aged inner disc	21	21	27.005	25.3669	1.63803	16	14	9.10995e-06
HAPLN1	higher in young inner disc	young inner disc	aged inner disc	21	21	35.9234	34.5494	1.37399	21	21	7.46033e-06
HAPLN3	higher in young inner disc	young inner disc	aged inner disc	21	21	30.8368	28.9751	1.86174	20	17	1.37644e-06
HHIPL2	higher in young inner disc	young inner disc	aged inner disc	21	21	31.6895	28.2952	3.39429	21	21	2.43089e-13
HIST1H1C	higher in young inner disc	young inner disc	aged inner disc	21	21	29.9226	28.3836	1.53901	21	18	9.36252e-05
HNRNPA2B1	higher in young inner disc	young inner disc	aged inner disc	21	21	26.7383	25.3466	1.39175	15	11	3.91906e-06
HP	higher in aged inner disc	young inner disc	aged inner disc	21	21	28.5001	34.0397	-5.5396	20	21	2.34259e-11
HPX	higher in aged inner disc	young inner disc	aged inner disc	21	21	24.8474	33.9108	-9.06344	16	21	5.50482e-17
HSP90AA1	higher in young inner disc	young inner disc	aged inner disc	21	21	28.8567	27.7277	1.12899	21	21	3.69552e-05
HSPA1B	higher in young inner disc	young inner disc	aged inner disc	21	21	29.1349	27.419	1.71595	21	21	5.93195e-07
HSPA5	higher in young inner disc	young inner disc	aged inner disc	21	21	29.7082	28.9681	0.74011	21	21	4.59922e-05
HSPA8	higher in young inner disc	young inner disc	aged inner disc	21	21	28.771	27.9034	0.867595	21	21	0.000170793
HSPG2	higher in young inner disc	young inner disc	aged inner disc	21	21	34.6581	33.178	1.48005	21	21	2.23043e-15
HTRA1	higher in aged inner disc	young inner disc	aged inner disc	21	21	32.5531	34.3274	-1.77432	21	21	1.98564e-14
HTRA3	higher in aged inner disc	young inner disc	aged inner disc	21	21	29.5882	31.1759	-1.5877	21	21	3.87313e-07
IGFBP7	higher in young inner disc	young inner disc	aged inner disc	21	21	30.3444	28.6164	1.72797	21	20	5.41457e-06
IGHA1	higher in aged inner disc	young inner disc	aged inner disc	21	21	23.4146	32.1288	-8.71417	11	21	7.54522e-10
IGHG1	higher in aged inner disc	young inner disc	aged inner disc	21	21	31.1254	36.373	-5.24764	21	21	1.52093e-15
IGHG2	higher in aged inner disc	young inner disc	aged inner disc	21	21	26.1727	32.7221	-6.5494	11	21	1.22161e-15
IGK	higher in aged inner disc	young inner disc	aged inner disc	21	21	30.8639	35.5371	-4.67324	21	21	2.44085e-15
IGKC	higher in aged inner disc	young inner disc	aged inner disc	21	21	28.2262	32.8437	-4.61748	18	21	6.1692e-13
IGLC6	higher in aged inner disc	young inner disc	aged inner disc	21	21	27.2545	30.6455	-3.39098	12	21	1.07452e-06
IGLL5	higher in aged inner disc	young inner disc	aged inner disc	21	21	28.0832	32.8543	-4.77106	11	21	4.85135e-12
IL17B	higher in young inner disc	young inner disc	aged inner disc	21	21	31.8804	25.9978	5.88256	21	13	1.2538e-14
IQGAP1	higher in young inner disc	young inner disc	aged inner disc	21	21	29.1991	27.2744	1.92469	21	20	1.50926e-05
ITIH2	higher in aged inner disc	young inner disc	aged inner disc	21	21	23.7873	31.7506	-7.96332	16	20	1.33755e-10
ITIH4	higher in aged inner disc	young inner disc	aged inner disc	21	21	25.9203	32.1909	-6.2706	19	21	1.23624e-10
ITIH5	higher in young inner disc	young inner disc	aged inner disc	21	21	31.2375	29.3316	1.90592	21	21	5.44382e-14
KRT14	higher in young inner disc	young inner disc	aged inner disc	21	21	29.1168	26.2126	2.90416	20	15	6.03979e-06
KRT19	higher in young inner disc	young inner disc	aged inner disc	21	21	30.1155	24.4811	5.63441	21	13	4.43541e-08
KRT8	higher in young inner disc	young inner disc	aged inner disc	21	21	30.8661	25.6607	5.20546	21	18	3.76992e-09
LAMA5	higher in young inner disc	young inner disc	aged inner disc	21	21	27.6232	25.6324	1.99077	20	18	1.50692e-08
LDHA	higher in young inner disc	young inner disc	aged inner disc	21	21	31.8073	30.9624	0.844876	21	21	1.20496e-06
LECT1	higher in young inner disc	young inner disc	aged inner disc	21	21	32.2378	30.1946	2.04319	21	21	2.50632e-07
LECT2	higher in young inner disc	young inner disc	aged inner disc	21	21	31.8126	28.8695	2.94305	20	17	4.49456e-07
LGALS3	higher in young inner disc	young inner disc	aged inner disc	21	21	28.4634	26.6005	1.86294	20	20	1.95608e-06
LMNA	higher in young inner disc	young inner disc	aged inner disc	21	21	30.7257	28.8091	1.9166	21	21	3.85228e-07
LOX	higher in young inner disc	young inner disc	aged inner disc	21	21	29.8474	27.298	2.54948	21	20	5.15177e-10
LOXL2	higher in young inner disc	young inner disc	aged inner disc	21	21	30.546	29.3293	1.21667	21	21	4.66456e-07
LTBP4	higher in young inner disc	young inner disc	aged inner disc	21	21	27.5317	26.1021	1.42956	17	20	0.000111473
LYZ	higher in young inner disc	young inner disc	aged inner disc	21	21	35.0372	33.5654	1.47184	21	21	4.57154e-07
MATN2	higher in young inner disc	young inner disc	aged inner disc	21	21	31.3331	28.8922	2.44087	21	21	2.79997e-14
MATN3	higher in young inner disc	young inner disc	aged inner disc	21	21	31.5295	26.8937	4.63581	21	21	1.2917e-16
MDH1	higher in young inner disc	young inner disc	aged inner disc	21	21	27.661	25.7776	1.88332	19	16	1.28368e-05
MFI2	higher in young inner disc	young inner disc	aged inner disc	21	21	31.6322	30.0139	1.61831	21	21	1.66706e-07
MXRA5	higher in young inner disc	young inner disc	aged inner disc	21	21	31.4317	30.3386	1.09312	21	21	7.35107e-07
MYH1	higher in young inner disc	young inner disc	aged inner disc	21	21	28.7991	24.0286	4.7705	21	21	2.30134e-06
MYL1	higher in young inner disc	young inner disc	aged inner disc	21	21	27.7326	24.7846	2.94799	19	16	0.000118729
NID2	higher in young inner disc	young inner disc	aged inner disc	21	21	30.4929	28.46	2.0329	21	21	1.7134e-12
ORM1	higher in aged inner disc	young inner disc	aged inner disc	21	21	27.9165	33.9602	-6.04368	20	21	8.80879e-15
P4HA1	higher in young inner disc	young inner disc	aged inner disc	21	21	27.2915	25.8529	1.43863	12	12	0.000102318
PCOLCE	higher in young inner disc	young inner disc	aged inner disc	21	21	33.2	31.8738	1.3262	21	21	2.18745e-09
PCOLCE2	higher in young inner disc	young inner disc	aged inner disc	21	21	32.5029	31.7544	0.748481	21	21	3.78328e-05
PDGFRL	higher in young inner disc	young inner disc	aged inner disc	21	21	29.957	29.3452	0.611762	21	21	0.000199793
PEBP1	higher in young inner disc	young inner disc	aged inner disc	21	21	28.6782	27.4644	1.21375	21	20	1.0089e-07
PFKP	higher in young inner disc	young inner disc	aged inner disc	21	21	27.8431	26.5937	1.24941	20	18	0.000240781
PGAM1	higher in young inner disc	young inner disc	aged inner disc	21	21	29.1363	27.5762	1.56011	21	18	4.63803e-08
PGK1	higher in young inner disc	young inner disc	aged inner disc	21	21	31.8582	30.846	1.01221	21	21	3.94965e-06
PGM1	higher in young inner disc	young inner disc	aged inner disc	21	21	28.5943	27.6426	0.951748	21	21	6.10052e-05
PKM	higher in young inner disc	young inner disc	aged inner disc	21	21	32.1328	30.8154	1.31738	21	21	4.85833e-09
PLG	higher in aged inner disc	young inner disc	aged inner disc	21	21	23.5565	32.4129	-8.85641	15	21	1.72444e-12
POSTN	higher in aged inner disc	young inner disc	aged inner disc	21	21	25.8345	29.0142	-3.17968	16	21	0.000255057
PPIA	higher in young inner disc	young inner disc	aged inner disc	21	21	29.6856	28.5622	1.12339	21	21	6.6597e-06
PPIB	higher in young inner disc	young inner disc	aged inner disc	21	21	30.3084	28.9086	1.39989	21	21	2.03095e-06
PRDX1	higher in young inner disc	young inner disc	aged inner disc	21	21	30.2483	28.6094	1.6389	21	21	7.49407e-14
PRDX6	higher in young inner disc	young inner disc	aged inner disc	21	21	29.1212	27.8683	1.25294	21	21	8.41722e-06
PRG4	higher in aged inner disc	young inner disc	aged inner disc	21	21	33.1033	36.3602	-3.25692	21	21	3.72861e-13
PTRF	higher in young inner disc	young inner disc	aged inner disc	21	21	29.708	26.1738	3.53421	21	15	3.8946e-13
PXYLP1	higher in young inner disc	young inner disc	aged inner disc	21	21	28.763	27.9164	0.846567	21	21	2.96662e-05
PYGB	higher in young inner disc	young inner disc	aged inner disc	21	21	27.0887	26.1259	0.962791	21	19	6.7103e-06
PYGM	higher in young inner disc	young inner disc	aged inner disc	21	21	27.7507	25.9044	1.84635	21	17	2.96995e-05
QSOX1	higher in young inner disc	young inner disc	aged inner disc	21	21	32.2672	31.6586	0.608586	21	21	1.02991e-07
RBP4	higher in aged inner disc	young inner disc	aged inner disc	21	21	28.4375	29.8038	-1.36636	20	21	9.3521e-09
RCN1	higher in young inner disc	young inner disc	aged inner disc	21	21	27.7218	26.301	1.42084	18	15	3.73407e-05
RCN3	higher in young inner disc	young inner disc	aged inner disc	21	21	30.1466	28.4391	1.70751	21	21	1.94429e-06
RNASE3	higher in young inner disc	young inner disc	aged inner disc	21	21	28.9133	26.4119	2.5014	17	11	2.5802e-05
RNASE4	higher in young inner disc	young inner disc	aged inner disc	21	21	33.2103	31.691	1.51924	21	21	9.50507e-10
RPS27A	higher in young inner disc	young inner disc	aged inner disc	21	21	28.0811	26.809	1.2721	15	16	2.22384e-05
S100A1	higher in young inner disc	young inner disc	aged inner disc	21	21	29.495	27.5106	1.98442	20	20	1.7097e-06
SCUBE1	higher in young inner disc	young inner disc	aged inner disc	21	21	29.1443	26.0564	3.08796	21	16	1.43071e-10
SERPINA1	higher in aged inner disc	young inner disc	aged inner disc	21	21	34.393	36.0877	-1.69467	21	21	2.35271e-06
SERPINA3	higher in aged inner disc	young inner disc	aged inner disc	21	21	32.5227	33.9494	-1.42664	21	21	1.3258e-06
SERPINA5	higher in young inner disc	young inner disc	aged inner disc	21	21	34.084	32.6027	1.48125	21	21	2.3329e-09
SERPINC1	higher in aged inner disc	young inner disc	aged inner disc	21	21	23.9197	32.9719	-9.05216	12	21	2.10593e-12
SERPINE1	higher in aged inner disc	young inner disc	aged inner disc	21	21	28.092	29.2496	-1.15761	21	21	4.63153e-06
SERPINF1	higher in aged inner disc	young inner disc	aged inner disc	21	21	24.9606	31.532	-6.57145	15	21	5.58459e-14
SLPI	higher in young inner disc	young inner disc	aged inner disc	21	21	33.0631	30.5425	2.52055	21	19	5.7179e-07
SMOC2	higher in young inner disc	young inner disc	aged inner disc	21	21	30.8074	29.9883	0.819162	21	21	5.54631e-06
SOD1	higher in young inner disc	young inner disc	aged inner disc	21	21	28.5648	26.3305	2.23436	18	15	6.33568e-05
SPP1	higher in young inner disc	young inner disc	aged inner disc	21	21	27.8559	26.1284	1.72745	21	16	1.37054e-07
SSC5D	higher in young inner disc	young inner disc	aged inner disc	21	21	30.0881	27.2781	2.81006	21	21	2.58269e-08
TF	higher in aged inner disc	young inner disc	aged inner disc	21	21	32.502	37.0649	-4.56288	21	21	5.62047e-12
TGFBI	higher in young inner disc	young inner disc	aged inner disc	21	21	33.3788	32.7603	0.618471	21	21	5.94892e-05
THBS3	higher in young inner disc	young inner disc	aged inner disc	21	21	30.7881	28.0433	2.74482	21	21	8.57917e-16
THBS4	higher in young inner disc	young inner disc	aged inner disc	21	21	30.2589	29.0589	1.20009	21	21	2.26998e-07
TIMP1	higher in aged inner disc	young inner disc	aged inner disc	21	21	30.965	31.8692	-0.904167	21	21	1.27274e-05
TIMP3	higher in aged inner disc	young inner disc	aged inner disc	21	21	29.0638	31.481	-2.41713	21	21	3.61092e-11
TKT	higher in young inner disc	young inner disc	aged inner disc	21	21	26.9928	25.3037	1.68909	18	17	1.00366e-05
TNC	higher in young inner disc	young inner disc	aged inner disc	21	21	34.6481	31.3916	3.25645	21	21	1.60692e-10
TNFRSF11B	higher in young inner disc	young inner disc	aged inner disc	21	21	32.0485	30.3519	1.6966	21	21	6.62087e-08
TNXB	higher in young inner disc	young inner disc	aged inner disc	21	21	34.2006	27.9794	6.22122	21	21	1.98213e-17
TPI1	higher in young inner disc	young inner disc	aged inner disc	21	21	31.2557	29.6563	1.59941	21	21	6.19895e-10
TUBA1B	higher in young inner disc	young inner disc	aged inner disc	21	21	28.9665	26.9291	2.03746	21	21	3.74782e-09
TUBB4B	higher in young inner disc	young inner disc	aged inner disc	21	21	29.3216	27.2209	2.10072	21	20	2.42193e-06
UGP2	higher in young inner disc	young inner disc	aged inner disc	21	21	29.1438	26.4174	2.72634	21	16	3.34681e-10
VASN	higher in young inner disc	young inner disc	aged inner disc	21	21	27.0692	26.0186	1.0506	18	17	9.75288e-05
VCAN	higher in young inner disc	young inner disc	aged inner disc	21	21	37.0854	35.0928	1.99264	21	21	5.04767e-07
VIM	higher in young inner disc	young inner disc	aged inner disc	21	21	34.6169	32.0233	2.59357	21	21	6.13854e-14
XYLT1	higher in young inner disc	young inner disc	aged inner disc	21	21	31.7575	29.8017	1.95582	21	21	2.82086e-11
YWHAE	higher in young inner disc	young inner disc	aged inner disc	21	21	29.0233	27.7376	1.28567	21	21	6.12336e-09
YWHAZ	higher in young inner disc	young inner disc	aged inner disc	21	21	29.0755	28.2817	0.793717	21	20	0.000162814

[truncated: 28 more sheets: Sheet10, Sheet11, Sheet12, Sheet13, Sheet14, Sheet15, Sheet16, Sheet17, Sheet18, Sheet19, Sheet20, Sheet21, Sheet22, Sheet23, Sheet24, Sheet25, Sheet26, Sheet27, Sheet28, Sheet29 …]
