# Supplementary figures and images for: DIPPER, a spatiotemporal proteomics atlas of human intervertebral discs for exploring ageing and degeneration dynamics
Source: eLife journal article supplement (doi:10.7554/elife.64940), 2020-12-31

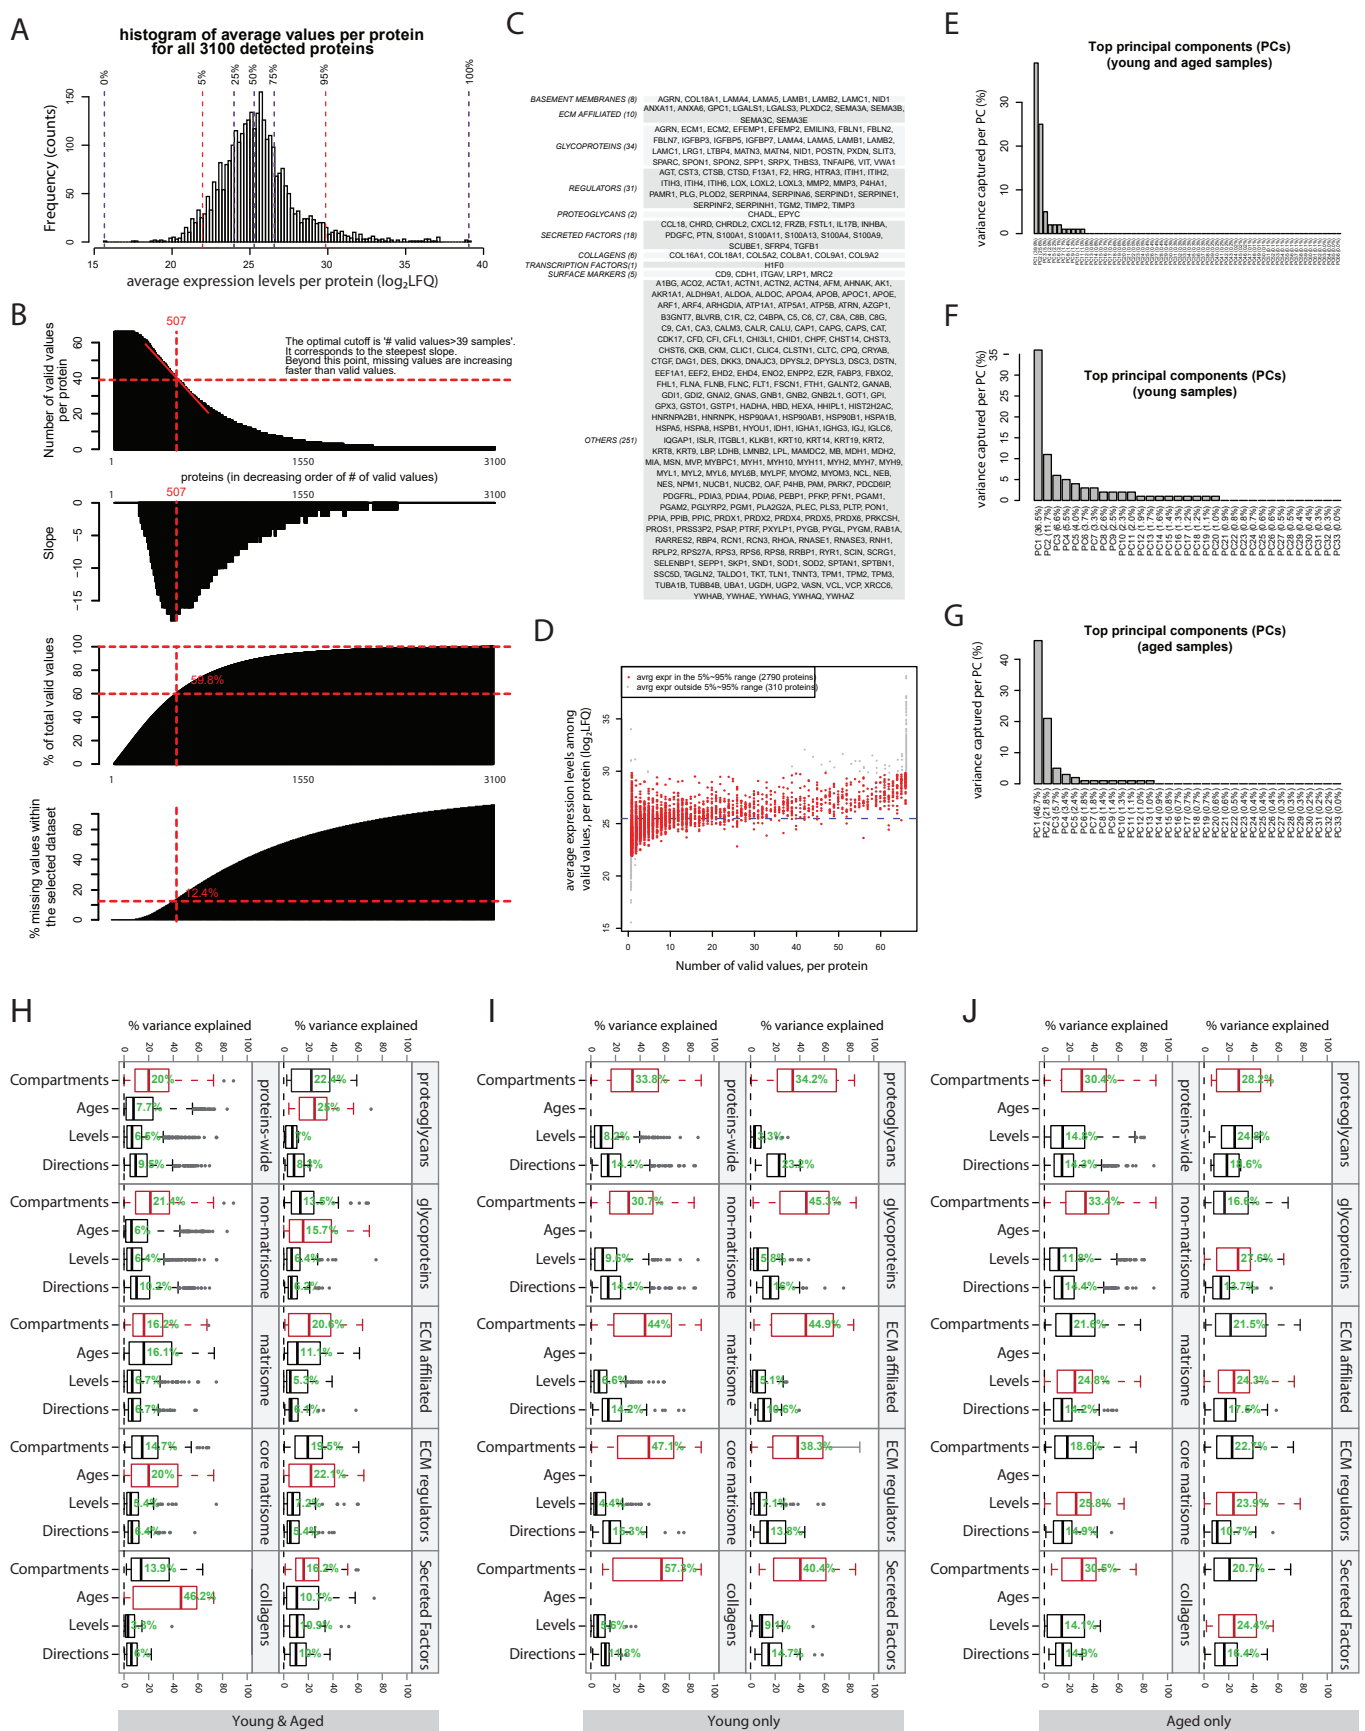

Supplement: supp [file elife_poa_e64940_Figure_2_figure_supplement_1.pdf › elife_poa_e64940_Figure_2_figure_supplement_1.pdf]

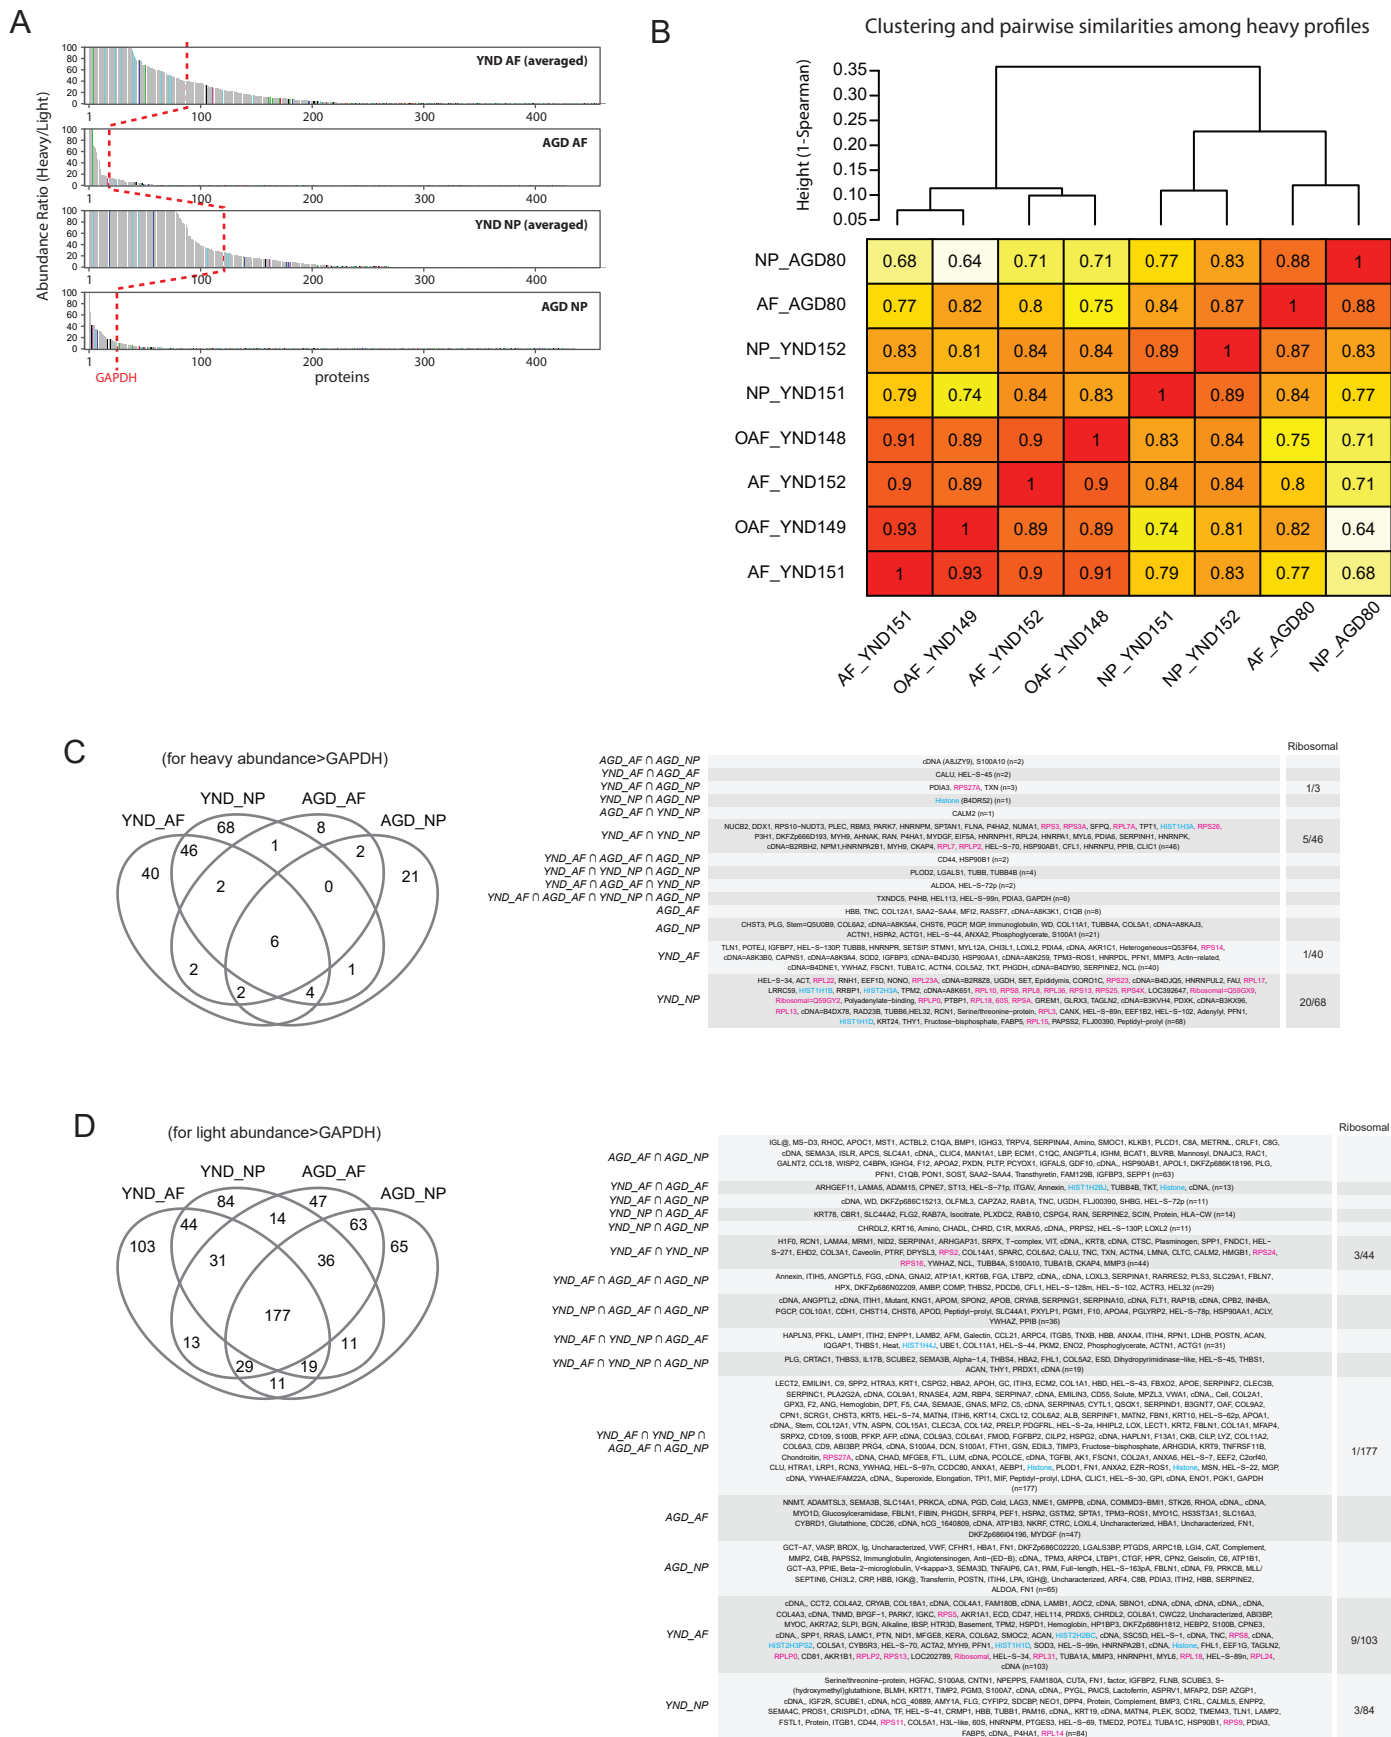

Supplement: supp [file elife_poa_e64940_Figure_7_figure_supplement_1.pdf › elife_poa_e64940_Figure_7_figure_supplement_1.pdf]
